# Supplementary material for: Exploration of High-Grade Transformation and Postoperative Radiotherapy on Prognostic Analysis for Primary Adenoid Cystic Carcinoma of the Head and Neck
Source: Frontiers journal article supplement (doi:10.3389/fonc.2021.647172), 2021-04-09
Supplement: Table_2.XLS [file Table_2.XLS]

## Sheet: 打印
序号	大类	病理号		序号	大类	病理号		序号	大类	病理号
1	Re	498757		50	P	629464		99	P	784392
2	Re	500317		51	P	630334		100	P	785096
3	P	503592		52	P	631111		101	P	787297
4	P	504458		53	P	634434		102	RR陈常梅	789704
5	P	516975		54	P	635698		删除64、70，实为100例
6	P	518891		55	P	637111
7	P	524519		56	P	640698
8	R张伟	525012		57	P	644772		易远转，尤其肺转移，手术首选，术后局部复发放疗，化疗不敏感，可试试靶向阿帕替尼。。。
9	P	526015		58	P赵大芬	656430
10	Re	526900		59	P	660956		气管ADCC术后5年OS 50-90%
11	Re	531053		60	P	662822
12	P	533747		61	P	664823
13	P	534878		62	R陈常梅	670684
14	P	535433		64	P	675818
15	P	536083		65	P	681042
16	P	539308		66	P	681169
17	P	542114		67	R冯照花	683580
18	P	543148		68	P	684583
19	P	547096		70	P	686090
20	P	548003		71	P	694556
21	P	551287		72	P	699978
22	Re	553547		73	Re	700733
23	Re	557517		74	P	706368
24	P	558332		75	Re	711604
25	Re	558393		76	Re	711803
26	Re	561587		77	P	714087
27	P	564137		78	P	715308
28	P	564808		79	Re	716648
29	P	565078		80	P	716763
30	Re	565397		81	P	723871
31	Re	572619		82	Re	724756
32	P	575225		83	Re	725547
33	P	576315		84	P	725998
34	P	579394		85	Re	729568
35	P	583707		86	P	731979
36	P	588154		87	R赵大芬	734215
37	P	594300		88	RR张伟	745989
38	P	594530		89	P	754646
39	P	599800		90	P	755024
40	Re	600838		91	Re	761375
41	Re	602858		92	P	765133
42	P	604277		93	Re	766750
43	Re	605149		94	Re	772140
44	P	605476		95	P	774095
45	P	609615		96	P	775047
46	Re	610392		97	Re	782143
47	Re	611712		98	P	783854
48	P	618539
49	P	627768

## Sheet: 总100例做IHC-含术前转移和疑似活检
大类	核分裂/2mm=13HPF/2	病理号（705213之后在麦迪库）	备注	筛选蜡块号	组织分型(优势型50%以上，混合型两种达到30%，混合29例，B为主8例,C为主18例，G为主16例，S为主29例)	TYPE(1G2C3S4B5M)	G-管状	C-筛状	S-实性	B-基底样	分级新加-30%S	sum	本次手术年龄	病案号（1057077及以前不全）	姓名	性别：男1女2	年龄分组	申请科室	诊断结论	手术日期	诊断时间	大体描述	部位	部位大组（1头颈2非）	部位分组	部位分号	手术1/活检2/细胞学3	切缘阳性	R0切除（是0否1）	原发1/复发2/转移3	复发时限	病灶个数	肿瘤最大径	T分期	神经侵犯（0未见1可见包括炎症包围神经）	脉管瘤栓	N分期	淋巴结转移（0无1有2未扫）	累及临近器官	有无远处转移	转移部位	转移序号	有无放/化疗史	治疗后反应	第二原发癌	免疫组化	项目	备注	末次随访
Re-0		498757		2	S	3		20	50	30	3	100	50	1160797	李建立	1	1		“左上颚、上颌骨腺样囊性癌二次术后” （右中颅底肿瘤） 结合病史及形态，符合腺样囊性癌（实体型），可见脉管瘤栓。 免疫组化:P63(1+),CK5/6(2+),CK34bE12(2+)。 特殊染色:粘卡(+),AB/PAS(+)。 注：必要时可借原病理切片对比观察。	2014-04-14	2014-04-24 08:43:00	破碎灰黄质韧组织，总大小5×4×3cm。	右上腭，上颌骨，右中颅底	1	口腔（上腭）应为右中颅底	5	1		1	2	2011-6右上腭部手术，2013-1复发手术颌下腺淋巴结转移，2014-2头痛，3-20外院CT复发7cm			4b-再核实原发部位	0	有	x	2		无	0	0	无	未报		有	P63(1+),CK5/6(2+),CK34bE12(2+)。		2014-04-29
Re		500317		4	G	1	60	30	10		2	100	37	1163046	齐君龙	1	1		“腺样囊性癌术后” （右鼻腔-前颅底沟通肿物） 腺样囊性癌。	2014-04-24	2014-04-29 10:57:00	灰黄组织一堆总大小4×4×1.5cm。	右鼻腔-前颅底沟通	1	鼻腔鼻窦颅底	4	1		1	2	可算			4b	0	不确定	x	2		无	0	0	无	未报		无		2005年外院右鼻腔手术及扩大手术后放化疗，2013-6起症状重现，	2019/1/10，电话？
P		503592		4	GC	5	60	40			1	100	51	1166825	王柱良	1	2	头颈外科1	(2)（部分舌） 横纹肌组织中可见腺样囊性癌浸润，侧切缘及基底切缘未见癌。	2014-05-16	2014-05-21 20:19:00	（2）部分舌切除标本，大小4×2×2cm，上附缝线，切面灰褐未见明显异常。另见小块灰褐组织，大小1.3×0.6×0.5cm，书页状切开，可见灰黄质硬区，大小1.0×0.5×0.5cm，全取材。	舌肌内	1	舌	10	1	R1，镜下延伸烧灼处	1	1				需核实切片肿瘤大小	1	不确定	x	2		无	0	0	无	未报		无		发现舌肿物5月就诊，术后未治疗随诊	2019-09-03
P		504458		4	B	4	10			90	2	100	58	1167157	高翠萍	2	2		（1）（舌肿物）冰、（2）（部分舌） 舌腺样囊性癌，可见神经侵犯，肿瘤大小4×3.5×2.5cm，侵及舌肌，未累及舌粘膜，舌切缘未见癌。 （3）（右颌下清扫） 淋巴结未见转移癌（0/7）。 pTNM分期：pT2N0	2014-05-23	2014-05-29 14:14:00	（2）部分舌切除标本2块，大者大小6.5×4×0.5-2.5cm，局部见一缺损区（冰冻），大小4.5×2×2cm，未见明确肿物残存。小者大小2.5×1.5×1cm，（3）颌下腺大小4×3.5×1.5cm，被膜光滑，切面灰黄分叶状，周围脂肪大小4×2.5×1.5cm，找到结节数枚，直径0.5-1.0cm。	舌	1	舌	10	1	R1，镜下延伸烧灼处	1	1				需核实切片深度	1	不确定	0	0		无	0	0	无	未报		无		术后未治疗	2019/9/4电话13810439680子
P		516975		7	S	3	10		90		3	100	27	1183703	相立芳	2	1		（1）（左侧眶内肿瘤）冰1、（2）（颅眶沟通肿瘤） 腺样囊性癌，可见多处神经侵犯。肿瘤累及周围纤维脂肪及横纹肌组织，并侵犯骨质。 免疫组化结果显示:AE1/AE3(3+),CK18(3+),CK7(3+),CK34βE12(3+),CK5/6(2+),CD56(1+),S100(1+),Bcl2(3+),Syno(-),ChrA（-),P63(-),Calponin(-),SMA(-),Ki67(+60%)。 说明：此例已充分取材，未见角化区域。	2014-08-13	2014-08-20 09:46:00	（2）灰白灰褐破碎不整形组织一堆，大小4.5×3.5×1.5cm，切面灰白质糟脆，其中见部分破碎骨质，大小1.5×1.0×1.0cm，可疑肿瘤侵犯。	左侧眶内，颅眶沟通）	1	泪腺/颅眶沟通	19	1	缓解神经压迫，未摘除眼球	1	1	ki-67达60%			根据影像和术中核实分期	1	不确定	x	2	骨	无	0	0	无	未报		有	AE1/AE3(3+),CK18(3+),CK7(3+),CK34βE12(3+),CK5/6(2+),CD56(1+),S100(1+),Bcl2(3+),Syno(-),ChrA（-),P63(-),Calponin(-),SMA(-),Ki67(+60%)	左额疼痛4月，左眼球突出1.5月就诊，核磁6-24显示左颅眶沟通病变累及骨质和海绵窦，术后放疗	2015/6/4电话13676389396和13969553228
P0		518891		7	B	4	15	5		80	2	100	73	1186185	杨先秀	2	2		（3）（口底肿瘤） 口底腺样囊性癌，可见脉管瘤栓，未见肯定神经侵犯；肿瘤累及口底粘膜及小涎腺，未累及横纹肌；距离基底<2mm。 淋巴结转移性癌 （1/18） （1）（左颈1区淋巴结） 0/8，另见涎腺组织； （2）（左颈2区淋巴结） 1/10	2014-08-25	2014-08-28 13:59:00	（1）脂肪及涎腺，涎腺大小4.0×3.0×2.0cm，切面灰黄分叶状，未见异常。脂肪内找到淋巴结数枚，直径0.3-0.6cm。（2）结节数枚，直径0.3-0.8cm。（3）灰红不整形组织，局部附粘膜，面积4.5×1.0cm，组织大小5.5×4.5×3.5cm；切面见一灰白灰黄界清结节，有包膜，大小3.5×3.5×2.0cm，切面灰黄有坏死性囊腔形成，直径0.2-0.6cm。周围少量脂肪及肌肉，脂肪内找到结节数枚，直径0.5-1.2cm。	口底	1	舌下腺	2	1	根治术，R1（基底<2mm）,淋巴结转移1/18	1	1				切片看分期和LNM	1	有	1	1		无	0	0	无	未报		无			2014-09-22
P0		524519		7	C	2		80	20		2	100	49	1194168	梁作军	1	1	头颈外科1	（13）（左侧部分上颌骨及左面部皮下肿物）、 腺样囊性癌，肿瘤大小4×4.5×2cm，浸润横纹肌、上颌骨及皮下组织，可见神经浸润，未累及皮肤；（5）（颞下窝）及（14）（鼻中隔深面组织）局灶纤维组织内可见癌浸润。 （6）（牙龈）冰 （病理号524412） 鳞状上皮粘膜组织及横纹肌组织，石蜡制片中组织周边见小灶异型上皮细胞团伴钙化，考虑为癌。 （8）（鼻中隔切缘）冰 （病理号524415） 纤维组织中见腺样囊性癌浸润。 （1）（筛窦）、（2）（中鼻甲）、（3）（眶组织）冰、（4）（颞下窝）冰、（7）（颊粘膜）冰、（9）（外侧皮下组织）冰、（10）（内侧皮下组织）冰、（11）（上策皮下组织）冰、（12）（下侧皮下组织）冰及（15）（鼻中隔切缘2）均未见癌。 （病理号524404、411、413、424、426、428、430、476） 上述送检组织内均未见癌累及。	2014-09-29	2014-10-09 18:27:00	（1）灰白破碎组织一堆，总大小1×1×0.3cm，质软。（2）灰红色不整形组织一块，大小3×2×0.5cm，多切面切开切面灰褐局灶质硬含骨组织。（5）灰白破碎不整形组织一堆，总大小2×1×0.6cm，质中偏韧。（13）不整形骨组织及周围软组织，总大小7×4×3.5cm，一侧面附皮肤，面积3×2cm，皮肤表面未见特殊，另一侧面见质软肿物，大小4×4.5×2cm，肿物切面灰白质软，累及骨组织及周围软组织，未侵及皮肤。（14）灰褐破碎不整形组织一堆，大小1.5×1.5×0.4cm。	上颌窦	1	鼻腔鼻窦颅底	4	1	根治术，上颌窦前壁至皮下组织，鼻中隔、牙龈，颞下窝有癌	1	1				4a	1	不确定	x	2	面部	无	0	0	无	未报		无		术后放疗	2015-02-13
R张伟		525012		1	GC	5	40	50	10		2	100	50	976220	张伟	1	1		“腮腺腺样囊性癌外院术后3年余” （2）（右腮腺深叶及肿物）冰及冰余 腮腺腺样囊性癌，大小2.5×2×2cm，可见神经侵犯。 （1）（右腮腺浅叶）未见癌累及。 淋巴结未见转移癌（0/16） （1）（右腮腺浅叶）周围淋巴结 0/1 （3）（右上颈清扫）淋巴结 0/15 rpTNM:rpT2	2014-10-09	2014-10-13 09:06:00	（1）灰黄不整形组织大小4×3.2×1cm。（3）结节数枚，直径0.2-0.8cm。	右腮腺	1	腮腺	1	1	R1，镜下延伸烧灼处	1	2	第一次术后3年余			2	1	不确定	0	0		无	0	0	无	未报		无		2011年4月外院腮腺ADCC切除，口角歪斜，未放疗，2014-5复发，9-23明显复发，手术及颈清扫（阴性）	2017-09-19
P0		526015		4	S	3	10		70	20	3	100	38	1195013	陈军	1	1	胸外科4	（8）（左肺上叶袖状切除标本）、（9）（左肺下叶） 左肺上叶腺样囊性癌。肿瘤主要位于上叶叶支气管腔内，侵透支气管壁达管壁周围纤维脂肪组织，累及主支气管及上叶肺段支气管，未累及下叶支气管及肺实质，（6）（下叶支气管切缘）冰、（7）（左主支气管切缘）冰及未见癌，上叶周围肺可见阻塞性肺炎及粘液栓形成，下叶周围肺未见明显病变。 淋巴结未见转移性癌（0/20） 上叶肺外淋巴结 0/1 上叶肺内淋巴结 0/1 下叶肺外淋巴结 0/2 下叶肺内淋巴结 0/1 （1）（肺门淋巴结） 0/2 （2）（5区及6区淋巴结） 0/2 （3）（下肺静脉旁淋巴结） 0/3 （4）（隆突下淋巴结） 0/3 （5）（下叶支气管旁淋巴结）0/5 免疫组化结果显示:CK7(2+),CD117(2+),TTF1(-),P63(-)。 pTNM分期：pT2aN0（请结合临床）	2014-10-14	2014-10-22 09:07:00	（8）左肺上叶袖状切除标本，大小14×10×8cm，主支气管长1.5cm，宽2cm，沿支气管剖开肺，于左肺上叶叶支气管内可见一肿物，大小3×1×1cm，灰白、质硬、界不清，累及主支气管，距主支气管切缘1.0cm，肺内外找到结节数枚，直径0.5-1cm，周围肺灰黄、质软，部分可见粘液栓。（9)左肺下叶切除标本，大小17×11×8cm，沿支气管剖开肺，未找到明确肿物及质硬区，支气管处可见缝线，肺内外找到结节数枚，直径0.3-0.5cm，周围肺灰红、质软。(1)炭黑结节2枚，直径0.5及1cm。(2)炭黑结节2枚，直径0.8及2cm。(3)炭黑结节1枚，直径1cm。(4)炭黑结节数枚，直径0.5-1cm。(5)炭黑结节数枚枚，直径0.4-0.8cm。	上叶支气管	2	气管支气管	6	1	R0	0	1	LN阴性			2a	1	不确定	0	0		无	0	0	无	未报		有			2014-11-20
Re-0		526900		5	S	3			100		3	100	46	1199338	高桂玲	2	1	头颈外科1	“左颌下腺癌外院术后1年余” (1)（咽旁肿物）冰、（4）（左咽旁肿物） 涎腺来源分化差的癌，伴大量神经侵犯，考虑为实体型腺样囊性癌，建议借阅原手术切片进一步对比。 淋巴结转移癌（3/7）。 （2）（左颈2区淋巴结）2/3 （3）（左颈2区淋巴结）1/4 pTNM分期：ypTxN2 （参考病理号：526858）	2014-10-20	2014-10-23 16:42:00	（2）结节数枚，直径0.2-0.8cm。（3）结节数枚，直径0.2-大小1.5×1×0.2cm。（4）灰黄质韧不整形组织一块，大小2×1.5×1cm，切面灰黄质韧结节状。	左颌下腺	1	颌下腺	3	1	R1，镜下延伸烧灼处	1	2	1年余			3	1	不确定	2-lnm切片核实	1		无	0	0	无	未报		无		2013-6外院左颌下腺术后为低分化腺癌，本次手术有LNM	2014-12-10
Re		531053		2	GC	5	40	40		20	2	100	63	552694	杨素文	2	2		“颌下腺癌术后20余年” （1）（口底复发肿物） 纤维脂肪组织中见大量腺样囊性癌浸润，侵犯血管壁、神经及周围横纹肌组织，并侵犯周围淋巴结（1/1）。 （2）（舌下神经） 神经及神经周围纤维结缔组织均见癌浸润。 （3）（舌下神经近端） 神经周围纤维结缔组织见癌浸润。	2014-11-17	2014-11-23 08:33:00	（1）不整形灰白灰黄组织一堆，大小4.5×4×2.5cm，切面部分区灰白质硬。（2）灰白组织，大小1.5×0.3×0.2cm。（3）灰白组织一粒，直径0.3cm。	颌下腺	1	颌下腺	3	1	有	1	2	20余年			3-核实面神经是否受累	1	血管壁侵犯	0	0		无	0	0	无	未报		无		1993-5-17外院左颌下腺adcc切除，7-2我院左颈及颌下LN清扫（0/16），后续放疗	2017-11-18
P		533747		4	C	2	20	80			1	100	33	1208248	张驰	1	1	胸外科1	（6）（右肺中下叶） 支气管腺样囊性癌，肿瘤主要位于右肺中间段支气管壁，累及下叶及中叶支气管开口处，可见脉管瘤栓及神经侵犯。肿瘤未累及中叶及下叶脏层胸膜，中叶及下叶周围肺组织局灶呈阻塞性肺气肿改变。（4）（支气管切缘）冰可见癌浸润，（8）（支气管切缘2）冰未见癌。 淋巴结转移性癌（3/20） 下叶肺外淋巴结 1/1 下叶肺内淋巴结 1/7 中叶肺外淋巴结 0/1 中叶肺内淋巴结 0/2 （1）（8区淋巴结） 0/1 （2）（7区淋巴结） 1/3 （3）（中间段支气管旁淋巴结）0/2 （5）（肺门淋巴结） 0/1 （7）（右上纵隔淋巴结） 0/2 （参见533572、533580）	2014-12-01	2014-12-05 16:15:00	（6）右肺中下叶；中叶大小10.5×5.3×2.8cm，下叶大小14×8.5×5cm，中间段支气管腔内管壁粗糙，粗糙区范围2.6×1.3×0.5cm，累及中间段支气管及下叶支气管开口处，似未累及中叶叶段支气管，中、下叶周围肺灰红质软，局灶灰红海绵样。中叶肺内、外找到淋巴结数枚，直径0.5-0.6cm，下叶肺内、外找到炭黑结节数枚，直径0.3-1cm。（1）炭黑结节1枚，直径0.4cm。（2）炭黑组织一块，直径1.5cm。（3）炭黑结节1枚，大小1.2×0.5×0.3cm。（5）炭黑结节2枚，直径0.3-0.5cm。（7）炭黑结节2枚，直径0.6-1.1cm。	支气管	2	气管支气管	6	1	R0	0	1				1c	1	有	2	1		无	0	0	无	未报		无		局切后扩切，有LNM，2015-1-5开始化疗4周期	2019-07-24
P		534878		1	BC原0-30-20-50	5	10	40	20	30	2	100	39	1205573	王海霞	2	1	胸外科4	（3）（气管肿瘤+舌骨） 气管腺样囊性癌，侵达气管外膜，未累及舌骨。未见脉管瘤栓及侵犯神经。癌组织距环周切缘（基底切缘）<0.1cm，（1）（气管下切缘）冰（病理号：534788）及（2）（气管上切缘）冰（病理号：534789）均未见癌。	2014-12-08	2014-12-11 11:35:00	气管一段，长4cm，直径2.5cm，气管腔面局灶灰黄隆起，范围3×2.3×1.5cm，切面灰黄质硬细颗粒状。另见完整舌骨。	气管	2	气管支气管	6	1	基底<1mm	1	1				3	1	无	x	2		无	0	0	无	未报		无			2018-04-17
P		535433		4	C	2	20	80			1	100	50	1208614	尉青霞	2	1		“外阴肿物外院活检术后” （4）（外阴及肿物） 腺样囊性癌。肿瘤大小2.5×1.5×1.5cm，浸润皮肤真皮、皮下纤维脂肪及周围横纹肌组织，可见神经浸润，未累及表皮，局灶表皮基底细胞伴有增生，皮肤切缘及另送（5）（外阴肿物基底切缘）均未见癌累及。 淋巴结未见转移性癌（0/21） （1）（右腹股沟淋巴结） 0/16 （2）（左腹股沟淋巴结1）冰 0/1 （3）（左腹股沟淋巴结2） 0/4	2014-12-10	2014-12-16 14:20:00	（4）灰红不整形组织，结构不清，总大小7×3.5×2cm，皮肤面积5×2cm，皮肤表面灰褐色尚光，多切面切开局部灰白质稍硬，质硬区范围2.5×1.5×1.5cm，界不清。（1）触及结节数枚，直径0.3-0.8cm。（3）结节数枚，直径0.3-0.8cm。（5）灰褐组织1粒，直径0.3cm。	外阴	2	外阴	11	1	R1，镜下延伸烧灼处	1	1				1b	1	不确定	0	0		无	0	0	无	未报	2006年右手背高分化鳞癌外院术后	无		2009年起外阴肿物，逐渐长大，5cm外院局切后扩切，位于偏右侧	2017/12/18，电话查
P		536083		2	S	3		20	50	30	3	100	55	1207718	姬秀敏	2	2	胸外科4	（3）（右肺上叶） 肺腺样囊性癌，肿瘤累及段支气管，未累及脏层胸膜。未见脉管瘤栓及侵犯神经。周围肺局部呈阻塞性机化性肺炎。（4）（支气管切缘）冰未见癌。 淋巴结未见转移性癌（0/19） 肺外淋巴结 0/3 肺内淋巴结 0/3，肿瘤临近但未明显累及1枚肺内淋巴结 （1）（叶间淋巴结（11区）） 0/2 （2）（上叶支气管旁淋巴结） 0/1 （5）（3区淋巴结） 0/4 （6）（隆突下淋巴结（7区）） 0/6 （见病理号：535996） pTNM分期：pT1bN0	2014-12-15	2014-12-18 18:54:00	（3）肺叶切除标本，大小13×8×5cm，肺膜完整尚光，沿支气管剖开，于段支气管管腔见肿物，大小2.5×2×1cm，累及段支气管及肺，距支气管切缘0.5cm，未累及脏层胸膜，周围肺支气管内见粘液栓，局部海绵样。肺内、外找到淋巴结数枚，直径0.8-1cm。（1）炭黑结节一枚，直径0.8cm。（2）炭黑结节一枚，直径0.8cm。（5）炭黑结节数枚，直径0.3-0.6cm。（6）炭黑结节数枚，直径0.5cm-大小2×1.5×0.4cm。	段支气管	2	气管支气管	6	1	R0	0	1				1c	0	无	0	0		无	0	0	无	未报		无			2019/9/4建议放疗
P		539308		1	S	3	10	15	70	5	3	100	42	1214121	顾海侨	2	1	胸外科3	（5）（右全肺及部分气管下段左主支气管隆突及奇静脉弓）（参见539253、539254） 腺样囊性癌，局部分化较差，伴坏死，可见神经侵犯，未见明确脉管瘤栓。肿瘤广泛累及气管、左主支气管、隆突、右主支气管、肺叶、段支气管、奇静脉弓、肺组织及脏层胸膜。上叶局部见肉芽肿性病变，考虑为结核，请待抗酸染色结果。上叶周围肺呈肺水肿改变，下叶周围肺呈轻度肺气肿，局灶伴肺水肿。（7）（上切缘）冰 气管壁组织中见肿瘤浸润。（8）（下切缘）冰 冰冻切片中左主支气管壁组织未见癌，石蜡连续切片后，可见小灶癌浸润，考虑肿瘤紧邻切缘。 淋巴结转移性癌（5/33） 上叶肺外淋巴结 0/3 上叶肺内淋巴结 2/2 下叶肺内淋巴结 1/3 肺门淋巴结 1/1 （1）（7区淋巴结） 0/4 （2）（4R淋巴结） 0/6 （3）（2R淋巴结） 1/9 （4）（3P淋巴结） 0/3 （6）（5区淋巴结） 0/1 （9）（8区淋…	2015-01-04	2015-01-09 10:29:00	（5）右全肺切除标本，下叶大小14×10×6cm，上叶大小13×7×7cm，未见中叶，叶间裂发育良好，上叶局部肺膜略灰白，范围1.5×2cm，主支气管直径3cm，中间段支气管直径1.5cm，距主支气管切缘1cm处，肺门根部见一肿物，大小4×3×4cm，肿物累及右主支气管及中间段支气管及上下叶叶段支气管及奇静脉弓，累及上下叶及叶间裂，未累及脏层胸膜，肺内外找到结节数枚，直径0.3-1.5cm，上叶局灶可见一质硬区，大小0.8×0.5×0.4cm，紧邻脏层胸膜，上下叶周围肺灰红质软。（1）炭黑结节数枚，直径0.4-1cm。（2）炭黑结节数枚，直径0.5-1.5cm。（3）炭黑结节数枚，直径0.6-1.3cm。（4）炭黑结节数枚，直径0.3-1cm。（6）炭黑结节一枚，直径1cm。（9）炭黑结节一枚，直径1cm。	右肺门	2	气管支气管	6	1	R1	1	1				2b	1	无	2	1		无	0	0	无	未报	2016-1-12胃壁间质瘤后切除	无		侵犯肺膜LNM,放疗3-12中出现多量心包积液，细胞学报可见非典型细胞，但病例写有腺癌细胞？加心包内注射白介素	2019-10-21
P		542114		5	S	3	10		90		3	100	64	1217618	赵萍	2	2	胸外科1	（5）（气管肿物） 气管粘膜下腺体来源的恶性肿瘤，结合形态及免疫组化结果考虑为腺样囊性癌，主要呈实性型结构。肿瘤侵犯气管全层，可见神经侵犯。（4）（支气管下切缘）冰局灶粘膜上皮内见少许肿瘤细胞浸润。（3）（切缘）冰可见肿瘤浸润。 淋巴结转移性癌（2/5） （1）（2R区淋巴结） 2/4 （2）（4R区淋巴结） 0/1 （参见542036、542080） 免疫组化结果显示:CK7(3+),Vimentin(1+),CD117(2+)；CK5/6、P63、Calponin、S100及SMA均显示肌上皮(+)；Actin(-)。	2015-01-20	2015-01-27 08:59:00	（1）结节数枚，直径0.3-0.8cm。（2）炭黑结节1枚，直径0.6cm。（5）气管一段，长1.8cm，直径1.9cm，距离一侧切缘0.5cm，粘膜表面呈结节状隆起，大小1.4×1×0.9cm，肿物临近另一侧切缘。	气管	2	气管支气管	6	1	R1	1	1				3	1	不确定	1	1		无	0	0	无	未报		有	CK7(3+),Vimentin(1+),CD117(2+)；CK5/6、P63、Calponin、S100及SMA均显示肌上皮(+)；Actin(-)。	有LNM,术后放疗	2016-10-09
P		543148		1	BC	5		40		60	2	100	65	1219221	耿喜娥	2	2	头颈外科1	（1）（鼻侧壁及后鼻孔肿物） 鼻侧壁及后鼻孔腺样囊性癌，（11）（上颌窦粘膜）、（12）（颞腭窝肿物）、（14）（左鼻中隔）、（15）（筛窦）、（16）（鼻咽顶）、（2）（上颌窦内侧壁切缘）冰、（3）（上颌窦底壁切缘）冰、（4）（翼腭窝肿物）冰、（5）（咽侧壁切缘）冰、（8）（中鼻甲后端切缘）冰、（9）（鼻咽顶切缘）冰、（10）（鼻泪管切缘）冰 可见癌组织浸润，其中（3）（上颌窦底壁切缘）冰 可见侵犯骨组织；（4）（翼腭窝肿物）冰 可见侵犯神经纤维。 （17）（上鼻甲）、（18）（鼻泪管）、（6）（鼻后孔内侧切缘）冰、（13）（咽侧壁切缘2）冰未见癌。（7）（鼻后孔底壁切缘）冰冻切片未见癌，石蜡切片中可见小灶癌组织浸润。 （病理号543098-100、543115-120、543134）	2015-01-26	2015-01-30 09:12:00	（1）不整形肿物、鼻甲及骨组织，其中肿物直径1.5cm，切面灰黄颗粒状，鼻甲粘膜光滑，总大小3×3.5×1.5cm，与肿物无明显粘连。（11）灰粉粘膜组织，光滑，面积3×3×0.4cm。（12）不整形灰黄组织3块，总直径1.5cm。（14）灰黄片状组织，大小2.5×1.5×0.3cm。（15）破碎的灰白粘膜及骨组织，粘膜光滑，总大小2.5×2.5×0.4cm。（16）灰粉不整形组织一块，大小1×0.4×0.2cm。（17）灰黄不整形组织2块，直径0.5cm。（18）灰白组织一块，直径0.5cm。	鼻侧壁及后鼻孔	1	鼻腔鼻窦颅底	4	1	扩切，冰冻切缘+后再扩大范围	1	1				3	1	不确定	x	2	骨	无	0	0	无	未报		无		鼻衄鼻堵3月，外院鼻腔肿物2.3cm切除，术后放疗	2017-01-06
P卓	3.5，直径100/100/150/170i-100/200p，ki20%	547096		2	G	1	70	30			1	100	67	1221337	石瑞霞	2	2		（1）（右乳改良根治标本） 乳腺腺样囊性癌，合并少许导管原位癌成分。肿瘤位于乳腺内下象限，大小2.2×1.8×1.0cm，累及皮肤真皮浅层，乳头未见Paget's病，未累及胸肌筋膜。周围乳腺呈萎缩性改变。 淋巴结未见转移癌（0/7） 腋窝淋巴结 0/6 （2）（右腋窝淋巴结） 0/1 免疫组化结果显示:ER(+1-10%弱阳（浸润癌）；导管内+＞90%强阳),PR(-（浸润癌）；导管内+＞90%强阳),HER2(-),CK5/6(2+),EGFR(2+),P63(2+),Calponin(-),CD10(-),CK14(2+),SMA(1+),S100(1+),Ki67(+局部20%)。	2015-02-25	2015-03-01 09:12:00	（1）右乳改良根治标本，大小23×18×3cm，附梭形皮肤，面积11×6cm，乳头无内陷、糜烂、结痂,于内下象限皮肤表面见一皱缩区，面积1.5×1.5cm，书页状切开乳腺，于皮肤皱缩区下见一肿物，大小2.2×1.8×1cm，切面灰白质硬，距胸肌筋膜0.5cm，紧邻皮肤，周围乳腺灰白灰黄质韧，腋窝脂肪大小5×4×1.5cm，经多人反复寻找找到结节数枚，直径0.2-2cm。（2）结节1枚，直径1cm。	右乳	2	乳腺	7	1	R0	0	1		1	2.2cm	2	1	无	0	0		无	0	0	无	未报		有		LN无转移，术后阿那曲唑内分泌治疗	2019-06-17
P		548003		15	G	1	80	20			1	100	47	1176284	程克华	2	1	头颈外科2	（4）（全喉气管及肿瘤）、（3）（食管壁及肿瘤）（参见547891-892） 气管腺样囊性癌，可见脉管瘤栓及神经侵犯。肿瘤浸润气管壁全层，累及声门下、左侧声门旁间隙、左侧声带肌、环状软骨、双侧甲状腺、颈前软组织、肌肉组织及食管壁纤维膜及肌层。舌骨、会厌及舌根切缘、双侧声门粘膜、双侧杓会皱襞及切缘、甲状软骨板、左侧甲状旁腺未见癌累及。（1）（左侧气管下切缘）冰、（2）（右侧气管下切缘）冰 气管壁组织内见癌累及。 甲状腺呈桥本氏甲状腺炎。 pTNM分期：pT4	2015-03-02	2015-03-08 13:46:00	（4）全喉双侧甲状腺切除标本，总大小9×4.5×2.8cm，舌骨完整大小4×4.5×1.5cm，会厌双侧声门及声门下粘膜光滑，气管壁及环状软骨处明显增厚质硬，切面灰黄质地细腻。增厚处总大小5×1.5×4cm与甲状腺紧密粘连，左侧甲状腺3×2×1.5cm，右侧4.5×2.5×2cm，左侧甲状腺旁见结节两枚，直径均0.6cm。（3）不规则灰黄灰粉组织一块，大小2.5×1.5×1cm，切面为灰黄肿瘤组织。	气管	1	气管支气管	6	1	送检切缘+	1	1				4	1	有	x	2	候，双侧甲状腺，食管壁	无	0	0	无	未报		无		累及声门下、食管肌层、颈部软组织	2019-11-15
P		551287		9	G	1	70	30			1	100	46	1228900	聂进	1	1	胸外科1	（7）（左全肺） 肺腺样囊性癌，可见脉管瘤栓及大量神经侵犯。肿瘤累及主支气管及上叶叶、段支气管、肺组织和脏层胸膜，侵犯肺门血管壁外膜及局部心包壁，未累及下叶肺组织。主支气管切缘可见癌。周围肺呈肺气肿改变。 淋巴结转移性癌（2/19） 上叶肺外淋巴结 0/1 上叶肺内淋巴结 2/2 下叶肺内淋巴结 0/4 (1)（隆突下淋巴结（7区）） 0/4 (2)（右主支气管旁淋巴结） 0/1 (3)（上叶支气管旁淋巴结（11区）） 0/1 (4)（4L区淋巴结） 0，纤维脂肪组织。 (5)（上纵隔淋巴结） 0/6 （6）（胸膜结节） 纤维脂肪组织伴出血。 pTNM分期：pT3N1(请结合临床)	2015-03-20	2015-03-26 09:55:00	（7）左全肺，上叶大小18.5×8.7×6.5cm，下叶大小13.5×8.7×6.5cm，支气管切缘直径2cm，肺膜表面光滑，于上叶支气管根部见一粘连片状软组织，面积1.7×1.2cm，疑为心包，沿支气管剖开肺，距支气管切缘1cm上叶肺内见一肿物，大小4×3.2×1.7cm，肿物累及主支气管及上叶叶段支气管，紧邻脏层胸膜。下叶叶段支气管粘膜光滑。肺内外找到结节数枚，直径0.7-1.3cm。多切面切开周围肺，上叶呈海绵状，下叶周围肺灰红质软，未见明显异常。（1）结节数枚，直径0.7-1.2cm。（2）结节1枚，直径0.3cm。（3）结节1枚，直径1cm。（4）可疑结节1枚，直径0.6cm。（5）结节数枚，直径0.2-0.5cm。（6）结节1枚，直径1cm。	左肺门	2	气管支气管	6	1	R1伴LNM和侵犯心包	1	1				3	1	有	1	1	心包	无	0	0	无	未报		无		术后外院放疗	2017-09-27
Re		553547		2	G	1	80	20			1	100	49	741874	王焕香	2	1	头颈外科1	“头皮腺样囊性癌外院术后” （2）（头皮肿物）、（1）（头皮骨膜）冰 真皮及皮下组织中见涎腺型癌浸润，结合病史及形态，符合腺样囊性癌。肿瘤延伸至皮下组织断端，未累及表皮。 （参见553461）	2015-04-01	2015-04-09 10:52:00	头皮组织，大小3.5×1.5×1cm，皮肤表面见一陈旧瘢痕长约2.8cm。	头皮	1	头皮	16	1	有	1	2	10年				1	不确定	x	2		无	0	0	无	未报		无		2004年外院局切，2005年复发3-20外院局切切缘不净至我院2005-4-5第一次扩切，2014-4-10术区触及结节，2015-3-18颅CT提示复发	2018-12-24
Re-0		557517		5	G	1	100				1	100	51	1236407	李玉梅	2	2		“外阴病损外院切除术后” （2）（部分右外阴组织及结节） 外阴组织内可见肿瘤组织，形态符合腺样囊性癌，间质中可见异物（缝线）及炎细胞浸润，符合术后复发。皮肤切缘及（1）（外阴肿物基底切缘）冰1未见癌。	2015-04-24	2015-04-30 14:59:00	（2）不整形皮肤及皮下组织，局灶区有色素沉着，总大小6×4×2cm，长缝线处可见灰白质硬区。大小1.5×1.2×1cm。短缝线处粘膜色素似有沉着，未见其他异常。	外阴	2	外阴	11	1	距烧灼处<0.5mm	1	2				1b	1	不确定	x	2		无	0	0	无	未报		无		2014-12发现外阴肿物，2015-3外院切除，本次大概还有1cm	2015-05-04
P		558332		7	S	3		30	70		3	100	51	1234628	张素娟	2	1		（1）（上唇肿物） 上唇腺样囊性癌，伴纤维化及胶原变性，可见神经侵犯，肿瘤累及表皮、横纹肌及局灶软组织断端。（2）（内切缘）冰1、（3）（上切缘）冰2、（4）（外切缘）冰3及（5）（牙龈切缘）冰4均未见癌累及。 pTNM分期：pT1	2015-04-29	2015-05-08 14:31:00	（1）粘膜组织一块，大小2.5×2×1.5cm，中央见一灰白隆起区，范围2×1cm，距侧切缘最近0.1cm。	上唇	1	唇	8	1	R1，镜下延伸烧灼处	1	1					1	不确定	x	2		无	0	0	无	未报		无		2cm，未扫淋巴结	2019-11-13
Re-0		558393		2	C	2		90	10	核分裂较多	2	100	45	1233679	贺丽	2	1		“左侧腭部腺样囊性癌术后” （1）（颅底肿瘤）冰、（2）（颅底肿瘤） 腺样囊性癌。	2015-04-30	2015-05-06 14:24:00	（2）破碎肿瘤组织及膜状组织，总大小4.5×3×0.5-1.5cm。	左前颅底-颅鼻沟通	1	口腔（上腭），复发为鼻腔鼻窦颅底	5	1	左鼻腔-上颌窦-翼颚窝-左海绵窦5cm减症状，术后影像仍有残留R2	1	2				4	0	不确定	x	2		无	0	0	无	未报		无		2008-8-18外院左上颌窦术后行放疗,本次术后天坛行伽马刀3次治疗	2019-6-3复发广泛有压迫，电话18235421332和13283666879可能去世？
Re-0-M缺片？	神	561587		4	SC	5		60	40		3	100	48	1241519	吕华伟	1	1	头颈外科1	“左腭腺样囊性癌术后” （1）（左侧部分上颌骨） 硬腭粘膜下及上颌窦内见腺样囊性癌浸润，肿物局灶累及骨质，未累及（2）（左上鼻甲）及（3）（上颌窦顶部粘膜）。牙龈切缘、中线粘膜切缘及左后粘膜切缘均未见癌。	2015-05-18	2015-05-21 14:48:00	（1）部分上颌骨及破碎的上颌窦组织，总大小6.5×5.5×2.5cm，上颌骨附牙齿三颗。硬腭粘膜后方及上颌窦内见灰白灰粉质地糟脆肿物。肿物总范围约2×2×1cm。（2）片状组织大小3×1.2×1.3cm，粘膜尚光滑。（3）灰黄碎组织一堆，直径1cm。	左腭，上颌窦	1	口腔（上腭）	5	1	复发灶切除，较广泛，不保证R0	1	2				4a	不确定	不确定	x	2	骨	无	0	0	无	未报		无		三年前外院左腭部ADCC术后，复发术后2015-5-27发现双肺多发小结节，考虑转移	2015-06-04
P		564137		5	BC	5		50	核分裂多	50	2	100	50	1245894	弓合心	1	1	头颈外科1	（2）（左侧咽旁肿瘤）冰及冰余 上皮肌上皮源性肿瘤，符合腺样囊性癌，部分间质玻璃样变，可见神经侵犯。 （1）（左颈2区淋巴结） 淋巴结未见转移癌（0/5），另见涎腺组织	2015-05-29	2015-06-04 09:34:00	结节数枚，直径0.8-1.3cm。	左侧咽旁翼腭窝	1	咽旁间隙	21	1	口咽鼻咽旁占位4cm，边缘<1mm	1	1	只看冰冻号			口咽分期？大小查	1	不确定	0	0		无	0	0	无	未报		无		术后放疗，治疗效果不好顾虑多慎电话，本人13753123899和妻18626863486	2017-09-22
PM卓	20，ki25%	564808		9	S	3	20	30	50		3	100	62	1246265	金桂芹	2	2	桓兴医院	（4）（左乳单纯切除标本） 乳腺腺样囊性癌。肿瘤位于乳腺外上象限，大小1.2×1.2×1.0cm，未累及乳头皮肤及胸肌筋膜。周围乳腺呈萎缩性改变。 淋巴结未见转移癌（0/3） （1）（前哨淋巴结1）冰1 0/1 （2）（前哨淋巴结1）冰2 0/1 （3）（前哨淋巴结1）冰3 0/1 pTNM分期：pT1N0（sn） 免疫组化结果显示:ER(-),PR(-),HER2(-),P53(散1+),Top2A(1+),CK5/6(3+),EGFR(1+),E-cad(3+),Ki-67(+30%)。	2015-06-02	2015-06-12 16:13:00	（4）左乳单纯切除标本，大小22×15.5×3.5cm，梭皮面积16×8cm，皮肤表面未见桔皮样征、陈旧瘢痕、新鲜切口，乳头未见内陷、糜烂、结痂，书页状切开乳腺，切面于外上象限见一肿物，大小1.2×1×1.2cm，切面灰白质硬界欠清，距胸肌筋膜2.5cm，周围乳腺灰黄质软。	左乳	2	乳腺	7	1	R0	0	1	按三阴乳腺癌化疗6周期	1	1.2	1c	0	无	0	0		无	0	0	无	未报		有	ER(-),PR(-),HER2(-),P53(散1+),Top2A(1+),CK5/6(3+),EGFR(1+),E-cad(3+),Ki-67(+30%)。		2019-7-17电话子13910075013和夫13910502400
P-缺5号及以后片子	1	565078		1	G	1	100				1	100	56	1244572	丁玉凤	2	2	头颈外科1	（1）（气管肿物）冰及冰余 腺样囊性癌，累及气管壁外膜。 免疫组化结果: CD117(2+),CK18(1+，散在细胞),CK5&6(2+), Calponin(肌上皮+),S100(2+),SMA(1+),TTF1(-)。 （5）（基底切缘）冰、（10）（基底切缘2）冰、（6）（声门下组织）、（7）（声门下切缘）冰、（9）（环状软骨下缘） 送检组织中均见癌浸润。 （2）（气管上切缘）冰、（3）（气管下切缘）冰、（4）（气管膜样部切缘）冰 纤维及软骨组织，未见癌。 （8）（甲状腺部分左叶）结节性甲状腺肿。	2015-06-03	2015-06-10 09:37:00	（6）灰黄不整形组织一块就大小1×0.6×0.3cm。（8）甲状腺组织大小3×1×0.5cm。（9）灰白不整形组织两块，大小1×0.6×0.2cm。	气管	1	气管支气管	6	1	R1,肿瘤2cm呈腔内外生长	1	1				3	0	不确定	x	2		无	0	0	无	未报		有	CD117(2+),CK18(1+，散在细胞),CK5&6(2+), Calponin(肌上皮+),S100(2+),SMA(1+),TTF1(-)。	术后放疗	2017-06-08
Re		565397		9	G	1	80		20		2	100	30	1241180	侯明芳	2	1	头颈外科2	“上颌窦癌术后5年” （左侧上颌骨及眶内容） 上颌窦腺样囊性癌，建议做免疫组化进一步明确证实，符合术后复发（建议提供5年前手术病理类型）。肿瘤侵透上颌窦壁，并累及鼻甲粘膜固有层、皮下脂肪、眶内容脂肪及眼球巩膜，可见神经侵犯，未累及泪腺、视神经、牙龈及硬腭。局部皮下脂肪切缘组织烧灼处可见癌。牙龈切缘、硬腭切缘及视神经断端均未见癌。	2015-06-03	2015-06-11 15:35:00	左侧上颌骨及眶内容切除标本，总大小9×6.5×2.5-5cm，其中眶内容大小4.5×3.5×3cm，未见皮肤。上颌骨附牙齿6颗，门齿缺失，各牙齿见不同程度的龋齿，牙龈及硬腭粘膜光滑。下鼻甲粘膜粗糙。粗糙区面积1.5×1.5cm，切面于上颌内见一灰白肿物，大小3.5×4×3.5cm。肿物切面灰白质细界不清，侵透上颌窦壁，并侵犯鼻甲粘膜，侵犯皮下脂肪。并侵犯眶内容脂肪及眼球巩膜。附视神经长1.5cm，直径0.4cm，未见肿物累及。于眼球上方可见一泪腺样组织，大小3×1.5×0.5cm。	左上颌窦	1	鼻腔鼻窦颅底	4	1	R1,复发灶切除	1	2	5年			4a	1	不确定	x	2	眼球，上颌骨	无	0	0	无	未报		无		2010外院上颌窦癌术后，2015-复发，术后外院放疗	2017-04-18
Re		572619		5	C	2	20	80			1	100	51	1251004	郭立新	2	2	头颈外科1	“右侧颌下腺腺样囊性癌术后” （3）（部分右下颌骨、颌下及口底组织） 纤维脂肪及肌肉组织内见腺样囊性癌浸润，结合临床，符合肿瘤术后复发，可见脉管瘤栓及神经侵犯。肿瘤累及下颌骨皮质，紧邻软组织切缘，未累及（4）（颅底下颌神经）及下颌骨外侧肌肉、纤维组织。（1）（颏下神经远端）冰、（2）（下颌神经近端）冰均未见癌。 （参见572522、572523）	2015-07-10	2015-07-16 17:53:00	右下颌骨及部分肌肉组织，总大小8×5×2cm，下颌骨大小7×3.5×1cm，附牙齿4颗，下颌骨外侧未附牙龈，内侧组织与下颌骨易剥离，切面局灶灰白胶冻状界尚清。（4）灰红组织两块，1.5×1×0.5cm。	右侧颌下腺	1	颌下腺	3	1	侵犯舌下腺下颌骨牙龈3cm，紧邻软组织，不保证R0	1	2				4a	1	有	x	2	下颌骨	无	0	0	无	未报		无		6年前右颌下腺外院手术及扩切手术	2018-04-19
P0		575225		4	SG	5	40	20	40		3	100	62	1255892	韩平朋	2	2	头颈外科1	（1）（口底肿物） 涎腺腺样囊性癌，可见神经侵犯。肿瘤累及鳞状上皮粘膜，未累及横纹肌组织。（2）（口底肿物后切缘）冰及（3）（神经切缘系线处为远端）冰内见腺样囊性癌浸润。 （参见575171、575199）	2015-07-23	2015-07-29 14:46:00	灰褐组织大小3×2.5×1.5cm，边缘带少许涎腺组织大小2.5×1×0.5cm。切面灰白质细界欠清，未累及涎腺。	口底	1	舌下腺	2	1	R1,肿瘤4×2cm条形，累及舌神经	1	1				3核实大小实质外侵犯	1	不确定	x	2		无	0	0	无	未报		无		建议术后放疗不知后续	2015-07-29
P		576315		5	C	2	30	50	20		2	100	45	1257859	魏海平	1	1	头颈外科1	（1）（左舌下腺肿物）冰及冰余（参见576315） 舌下腺腺样囊性癌，可见神经侵犯。（3）（舌下腺切缘）未见癌。 淋巴结未见转移性癌（0/17） （2）（颌下清扫） 0/4，另见涎腺组织。 （4）（2区淋巴结） 0/13 pTNM分期：pT3N0	2015-07-29	2015-08-03 15:48:00	（2）颌下腺组织及少许脂肪，颌下腺组织，大小5×2.5×3cm，切面灰黄分叶状，未见明确异常。周围脂肪找到结节数枚，直径0.5-1.5cm。（3）灰白质略硬组织数块，直径0.5-1cm，全埋。（4）结节数枚，直径0.5-1cm。	左舌下腺	1	舌下腺	2	1	肿瘤与舌下腺完整切除4.6cm,边缘<1mm	1	1	只看冰冻号			3核实大小实质外侵犯	1	不确定	0	0		无	0	0	无	未报	2019-5-15甲状腺右叶近峡部结节可疑恶性，未穿刺？查	无		术后放疗	2019/11/19电话15947040078和13789546253
P-0-M		579394		15	GCSB	5	40	25	30	5	3	100	61	1257941	王玉范	2	2	头颈外科2	（3）（全喉全甲状腺） 气管腺样囊性癌，侵犯双侧甲状腺腺叶；侵犯神经，累及（1）（左侧喉返神经）和（2）（左侧食管表面组织）。双侧声室带、双侧杓会皱襞、舌根切缘未见癌；气管切缘见癌浸润。 气管旁淋巴结未见转移性癌（0/1）。	2015-08-13	2015-08-21 11:37:00	（3）全喉全甲状腺，总大小11×5.5×2.3cm。沿环后区剖开，双侧声室带未见异常。另见双侧甲状腺，甲状腺左叶大小为4×2×2cm。于甲状腺左叶与环状软骨间见灰白质硬肿物，大小2.5×1.3×2.2cm，似累及状腺左叶及环状软骨，未累及左梨状窝。甲状腺右叶大小3.6×2.5×1.5cm，多切面切开，其与气管软骨间似有灰白肿物累及。另见舌骨无异常。（1）灰白组织大小1×0.7×0.2cm。（2）灰黄灰黄组织大小1.8×0.6×0.5cm。	气管	1	气管支气管	6	1	R1，2.5cm，累及甲状腺和食管(壁外压迫)，气管切缘	1	1				4	1	不确定	x	0	喉	无	0	0	无	未报		无		术后建议放疗	2015/8/31电话13674670593
P		583707		6	G	1	90	10			1	100	63	1264295	刘爱叶	2	2	胸外科1	（9）（左全肺） 肺主支气管壁腺样囊性癌。肿瘤主要位于主支气管壁内，浸透主支气管壁达管壁周围纤维脂肪组织，累及上下叶支气管分叉，局灶累及邻近上、下叶叶支气管壁，可见多灶神经浸润，未见明确脉管瘤栓，肺实质内未见癌。 (8)（支气管切缘）冰未见癌。上、下叶周围肺未见显著病变。 淋巴结未见转移性癌（0/19）。 支气管分叉处淋巴结 0/2 上叶肺外淋巴结 0/1 下叶肺外淋巴结 0/1 （1）（肺动脉干旁淋巴结） 0/2 （2）（隆突下淋巴结（7区）） 0/3 （3）（主动脉窗淋巴结（5区）） 0/2 （4）（主动脉弓旁淋巴结（6区）） 0/5 （5）（左主支气管旁淋巴结） 0/1 （6）（第4区淋巴结） 0/1 （7）（左侧气管旁淋巴结（4L区）） 0/1 免疫组化结果显示:AE1/AE3(3+),CK5/6(+),P63(+),S100(+),CK7(灶+),TTF1(-),CD117(3…	2015-09-07	2015-09-16 08:56:00	（9）左全肺切除标本，上叶肺大小11×9×系膜光滑，下叶肺大小12×8×3cm，胸膜光滑，上下叶叶间裂清晰，距主支气管切缘1.0cm主支气环管壁弥漫管壁增厚，长约2.0cm，中央局灶隆起，隆起区大小1.0×0.5×0.3cm，切面灰白似局限于主支气管壁内，紧邻上下叶支气管分叉，多切面切开上下叶周围肺，肺内未见明确肿物及质硬区，肺组织红褐质软。上下叶肺外淋巴结数枚，直径0.5-0.7cm。（1）炭黑结节两枚，直径0.3-0.4cm。（2）结节数枚，直径0.5-1.5cm，部分结节融合灰黑质中。（3）炭黑结节两枚，直径0.4-0.5cm。（4）结节样物数枚，直径0.3-0.5cm。（5）炭黑组织一粒，直径0.3cm。（6）灰黑组织一粒，直径0.2cm。（7）灰黑组织一粒，直径0.4cm。	主支气管	2	气管支气管	6	1	R0	0	1				1c	1	无	0	0		无	0	0	无	未报		有	AE1/AE3(3+),CK5/6(+),P63(+),S100(+),CK7(灶+),TTF1(-),CD117(3+)。	左全肺切除	2016-09-28
P0		588154		5	SG	5	40		60		3	100	54	1266455	候翠平	2	2	头颈外科1	（1）（部分上颌骨）、（2）（上颌骨浅面组织）冰及冰余 （参见588072） 腺样囊性癌，可见神经侵犯，肿瘤侵犯横纹肌及上颌骨骨质，未累及鳞状上皮粘膜。（5）（上颌神经切缘）可见肿瘤累及。（4）（软腭切缘）冰 未见癌。（参见588085） （3）（硬腭切缘）冰 （参见588084） 纤维组织中见腺样囊性癌累及。 pTNM分期：考虑为pT4a（供临床参考）	2015-10-08	2015-10-12 17:12:00	（1）破碎上颌骨、牙齿及肿物，总大小9×9×4cm，其中一块似为部分硬腭，大小5×4×2cm，上附三颗牙齿，粘膜面尚光滑，软硬腭交界基底处可见粗糙不规则肿物，大小约4.5×3.5×1.5cm。（5）灰褐组织，直径0.6cm。	上颌窦	1	鼻腔鼻窦颅底	5	1	R1，上颌窦-硬腭-翼颚窝-翼内外肌-牙槽骨	1	1				2	1	不确定	x	2	上颌骨	无	0	0	无	未报		无		建议术后放疗不知后续	2015-10-15
P		594300		7	BC	5	10	40		50	2	100	44	1276525	田学忠	1	1	头颈外科2	（1）（甲状腺部分右叶）（2）（气管膜样部）冰（参见594233）（3）（全喉） 气管腺样囊性癌。肿瘤侵透气管壁全层达周围软组织并累及甲状腺左叶及部分右叶；累及左侧声门下区；未累及双侧声室带、前联合及甲状软骨膜。气管膜样部、气管切缘、舌根切缘未见癌。	2015-11-09	2015-11-13 16:33:00	（3）全喉切除标本，未见会厌软骨，可见双侧声室带、双侧声门下区及前联合，大小8×5×3.5cm，双侧声室带粘膜光滑，未见肿物。左侧甲状腺叶大小5×3.5×2.5cm。气管长1.5cm，周长4cm，距气管切缘1.5cm气管左侧壁见一肿物，大小3.5×2×1.8cm，切面灰白实性质硬，侵及气管全层及左侧甲状腺。（1）甲状腺组织，大小1.5×1.3×0.8cm，切面灰红色，局灶灰白，范围约0.8×0.4cm，全埋。	气管	1	气管支气管	6	1	达气管壁周软组织和甲状腺，气管边缘<1mm	1	1				4	1	不确定	x	2	甲状腺，喉	无	0	0	无	未报		无		术后咽漏愈合	2020-02-07
P卓	5.5，直径50微米围，ki15%	594530		6	GC-5号蜡块认为有S，且ki升高	5	50	40	5	5	2	100	59	1278392	高亚玲	2	2	乳腺外科1	(4)（右乳单纯切除标本） 结合形态及免疫组化结果符合乳腺腺样囊性癌，未见明确脉管瘤栓及神经侵犯。乳头、皮肤及胸肌筋膜未见肿瘤，周围乳腺呈腺病改变。 淋巴结未见转移性癌（0/3） （1）（前哨淋巴结1）冰 0/1 （2）（前哨淋巴结2）冰 0/1 （3）（前哨淋巴结3）冰 0/1 免疫组化结果显示:ER(-),PR(-),HER2(1+),CK5&6(3+),P63(2+),E-cadherin(3+),EGFR(-),P53(-),TOP2A(1+),Ki-67(10% +)。 pTNM分期：pT1N0(sn）	2015-11-10	2015-11-16 17:09:00	乳腺大小18×17×3cm，附梭皮面积13×4.5cm，乳头皮肤未见异常，书页状切开乳腺，于外上象限见一灰白肿物，大小2.2×2.5×1.5cm，切面灰白灰黄实性质硬界欠清，肿物距胸肌筋膜最近0.2cm。周围乳腺灰白灰黄实性质韧。	右乳	2	乳腺	7	1	R0	0	1		1	2.5cm	2	1	无	0	0		无	0	0	无	未报		有	ER(-),PR(-),HER2(1+),CK5&6(3+),P63(2+),E-cadherin(3+),EGFR(-),P53(-),TOP2A(1+),Ki-67(10% +)。 pTNM分期：pT1N0(sn）		2019-11-28
P		599800		4	S	3	5	30	65		3	100	53	1282004	赵玉花	2	2	头颈外科1	（1）（右颌下腺及肿物）冰及冰余 （参见599800） 右颌下腺腺样囊性癌，肿瘤侵犯（6）（舌神经）。 （4）（舌神经远端切缘）冰 （参见599825）及（5）（舌神经近端切缘）冰 （参见599826）未见癌。 淋巴结转移性癌（2/40） （2）（右颌下LN1） 1/1 （3）（右颌下LN2） 0/1 （7）（右颈1区LN清扫） 0/4 （8）（右颈2区LN清扫） 1/17 （9）（右颈3区LN清扫） 0/17 pTNM:T3N2	2015-12-04	2015-12-09 09:48:00	（2）结节1枚，直径1cm。（3）结节1枚，直径1.5cm。（6）灰褐组织，大小3×0.1-0.7×0.5cm。（7）结节数枚，直径0.5-0.6cm。（8）结节数枚，直径0.5-1.2cm。（9）结节数枚，直径0.5-1.5cm。	右颌下腺	1	颌下腺	3	1	距烧灼边缘<1mm,侵犯软组织和舌神经，LNM	1	1				3核实大小实质外侵犯	1	不确定	2	1		无	0	0	无	未报		无		8年前自行扪及肿物逐渐长大	2016-03-16
Re		600838		1	G	1	95	5			1	100	50	1284271	刘翠英	2	1	头颈外科2	“头皮腺样囊性癌多次术后” （3）（头皮肿物） 真皮及皮下组织内可见癌组织浸润，结合病史及形态，符合腺样囊腺癌，肿瘤累及横纹肌，可见神经侵犯。基底切缘、（1）（上切缘）冰及（2）（下切缘）冰均未见癌（参见600700、600701）。	2015-12-09	2015-12-15 18:52:00	皮肤及皮下脂肪切除标本，大小6×3.5×0.7cm，皮肤面积6×3.5cm，皮肤中央见一疤痕，长3cm，切面未见明确肿物。	头皮	1	头皮	16	1	扩切，距基底最近处1mm	0	2				3核实神经侵犯程度	1	不确定	x	2		无	0	0	无	未报		无		2003发现，2005-8切未送，2014-2切未送，2015-11外切	2019-06-13
P		602858		4	G	1	95	5			1	100	33	1283355	蔺红霞	2	1	妇科2	“外阴腺样囊性癌2次术后” （6）（外阴扩大切除标本（缝线为下切缘）） 纤维结缔及横纹肌组织中见腺样囊性癌浸润，未累及表皮，肿瘤延伸至基底烧灼边缘，伴间质大量急、慢性炎细胞浸润和多核巨细胞反应，符合术后改变。下切缘可见癌浸润。（4）（下基底）冰见极少许腺样囊性癌浸润，（10）（下基底2）见极少许胞浆透明的细胞巢，考虑为癌（经连切片病变消失）。（1）（内侧基底）冰、（2）（外侧基底）冰、（3）（上基底）冰及（7）（下切缘（缝线处为基底））冰均未见癌。 （5）（肛提肌）冰、（8）（直肠前壁）冰、（9）（直肠前壁2）冰 纤维脂肪及肌肉组织中见腺样囊性癌浸润。 （参见602635-602638、602642、602654、602655、602657）	2015-12-04	2015/12/28 12:06:00是第二次扩切的	（6）外阴扩大切除，大小7×3×4cm，皮肤面积6.5×3cm，一端附缝线，皮肤表面附毛发，未见明确肿物。皮下脂肪组织内局灶灰黄质稍硬，直径1cm。（10）脂肪组织，大小1.5×1×1cm。	外阴	2	外阴	11	1	扩大切，肛提肌直肠前壁+	1	2				2	1	不确定	x	2	肛提肌，直肠前壁	无	0	0	无	未报		无		2013年自觉小阴唇肿物，2015-10-26外院局切，第一次本院扩切术后切缘+，行第二次扩切，术后放疗	2018-09-25
P0		604277		1	C	2	5	70	5	20	2	100	51	1286943	杨凤霞	2	2	头颈外科2	（2）（右咽旁肿物）冰 （参见604205）、（3）（右颌下+右咽旁肿物） 颌下腺腺样囊性癌，可见神经侵犯，肿瘤大小4.5×3.5×2.5cm，累及周围纤维脂肪及横纹肌组织。 淋巴结转移性癌（1/23），形态及免疫组化染色支持为转移性甲状腺乳头状癌，未累及淋巴结被膜外。 颌下淋巴结 0/3 （1）（右面前淋巴结）冰 0/1 （参见604150） （4）（右颈3区清扫） 0/7 （5）（右颈2区清扫） 1/10，免疫组化结果:PAX8(3+),TG(3+),TTF1(3+) （6）（右颈2b区清扫） 0/2	2015-12-28	2016-01-04 17:03:00	（3）灰红不整形组织一块，质较硬，大小1.5×4×3cm，切面部分区似为涎腺组织，其余大部分区被肿物占据，肿物大小4.5×3.5×2.5cm，边界不清，周围脂肪触及结节数枚，直径0.4-0.6cm。（4）结节数枚，直径0.6-0.3cm。（5）结节数枚，直径0.6-0.4cm。（6）结节数枚，直径0.2-0.3cm。	右颌下腺	1	颌下腺	3	1	侵犯颌下舌下腺和口底肌肉、舌及舌下神经	1	1		1	4.5cm	3	1	不确定	0	0		无	0	0	无	未报	淋巴结转移性甲乳癌	无		3年前发现，近一年明显长大，术后建议放疗	2016-01-28
Re		605149		2	S	3	5	10	80	5	3	100	48	1285056	张素芳	2	1	头颈外科1	“左外耳道腺样囊性癌术后17年” （左侧外耳道及乳突肿物） 形态符合腺样囊性癌，肿瘤累及真皮及软骨。 建议借阅原手术切片进一步对比。	2015-12-30	2016-01-07 11:31:00	灰黄破碎组织总大小3×3×1.5cm，切面灰白灰黄质槽脆，直径1.5cm。	左外耳道	1	外耳道	9	1	复发切除，未送切缘	1	2	17年			外耳分期？	0	不确定	x	2		无	0	0	无	未报		无		1998年外切术后放疗，本次术后建议回当地商讨放疗事宜，回当地放疗	2018-12-27
P		605476		4	G	1	80	15	5		2	100	51	1289169	王贵平	2	2	胸外科2	（7）（左全肺）、（4）（左肺上叶口肿物及淋巴结）冰及冰余 腺样囊性癌，肿瘤位于左主支气管壁及左肺上叶支气管腔内，临近但未累及肺门处大血管。肿瘤大小5×1.9×1.8cm，可见神经侵犯及脉管瘤栓。肿瘤未累及脏层胸膜及下叶叶、段支气管。（5）（左主支气管切缘）冰 未见癌，上叶周围肺呈肺气肿改变，下叶周围肺局部呈阻塞性肺炎伴机化改变。 淋巴结转移性癌（2/35），部分淋巴结破碎，无法准确计数。 上叶肺内淋巴结 1/3 上叶肺外淋巴结 0/2 下叶肺内淋巴结 0/2 （1）（肺门淋巴结（10区）） 1/2 （2）（隆突下淋巴结（7区）） 0/12 （3）（4L淋巴结） 0/6，淋巴结被膜外纤维组织中见少许癌浸润。 （6）（左喉返神经旁淋巴结） 0/8 pTNM分期：pT2bN1 （参见605383、605388）	2016-01-04	2016-01-07 15:58:00	（7）左全肺切除标本，上叶肺大小20×11×5.5cm，下叶肺大小18.5×12×5.5cm，叶间裂发育不全，主支气管长4cm，直径1.9cm，距支气管断端约0.2cm于主支气管腔内见一肿物，大小5×1.9×1.8cm，切面灰白实性质硬界不清，累及主支气管及上叶叶支气管，未累及下叶叶段支气管，与肺门大血管关系紧密，上下叶肺内外炭黑结节数枚，直径0.6-1cm，上下叶周围肺灰红质软，大部分呈灰黄海绵状。（1）炭黑结节两枚，直径0.8-1.8cm。（2）炭黑结节数枚，直径0.5-2.5cm。（3）炭黑结节数枚，直径0.5-3cm。（6）炭黑结节数枚，直径0.2-0.6cm。	支气管	2	气管支气管	6	1	R0,LNM	0	1				3	1	有	1	1		无	0	0	无	未报		无		随访	2017-09-29
P		609615	实性区需与基底鳞鉴别	16	S	3	5	5	90		3	100	43	1292646	魏东	1	1	头颈外科2	（2）（全喉左侧甲状腺部分气管左气管食管沟清扫）、（1）（左气管壁肿物）（参见609566）、（3）（气管左侧壁切缘）冰 （参见609570） 气管分化差的癌，细胞呈实性巢片状、少许筛孔状及腺样排列，细胞小而一致，可见散在多灶性坏死；并见少许神经侵犯及一灶脉管瘤栓；未见与粘膜的移行关系；结合免疫组化染色结果，符合实体型腺样囊性癌。肿瘤累及左侧环状软骨及左侧甲状软骨板，累及左侧声门旁间隙；并小灶累及左侧甲状腺被膜，未累及左侧甲状腺实质；未累及双侧声室带、前联合、会厌软骨；未累及会厌前间隙及右侧声门旁间隙。双侧杓会皱襞切缘、舌根切缘、气管左侧壁切缘及气管切缘均未见癌。 气管食管沟淋巴结一枚，未见转移癌（0/1）。另见少许甲状旁腺组织。 此例形态不典型，需要鉴别的肿瘤包括实体型腺样囊性癌和基底细胞样鳞状细胞癌。肿瘤未见与粘膜移行关系，并见少许神经侵犯证据；免疫组化染色结果未见肯定鳞状分化证据，…	2016-01-25	2016-02-01 11:02:00	（2）全喉切除标本，大小12×6×4cm，会厌及双侧声室带粘膜光滑，于左侧环状软骨粘膜下可见一肿物，大小3.8×3.5×2.5cm，切面灰黄灰红质硬颗粒状，累及环状软骨及气管，并侵犯左侧甲状软骨板及少部分左侧声门旁间隙；未累及双侧声室带、会厌软骨及会厌前间隙；未累及右侧声门旁间隙。气管旁可见部分灰红甲状腺组织，大小5×3.5×2cm，多切面切开，切面似可见肿瘤侵犯。另附游离舌骨，大小4.5×3.5×1.2cm，骨膜下剔除软组织，舌骨骨质光滑，未见肿瘤侵犯。气管周围软组织中找见可疑结节多枚，直径0.3-0.5cm。	气管	1	气管支气管	6	1	距离边缘<1mm，实体型ki67-40%，早读与基底鳞癌鉴别	1	1				4	1	有	x	0	喉	无	0	0	无	未报		无		术后放疗	2017/4/10，电话妻15133258901和15832296222，预后不佳？
Re-0	9号-围神经炎症	610392		7	C	2	5	90	5		2	100	76	1294640	李秀芹	2	2	头颈外科1	“右侧腮腺癌三次手术后1年余” （1）（部分下颌骨及腮腺及复发肿物） 涎腺腺样囊性癌，结合病史，符合术后复发。肿瘤累及皮肤皮下及横纹肌组织，呈多结节分布；未累及下颌骨骨膜。周边及基底切缘未见癌。 另见皮肤组织，真皮层胶原纤维增生、少许异物（缝线）及异物巨细胞反应。	2016-01-27	2016-02-02 09:57:00	（1）带皮不整形软组织一块，附下颌骨及涎腺，总大小8.5×6.5×4cm，表面附梭皮面积6×1.7cm，皮肤表面见一陈旧瘢痕，长3cm，切面于皮下及涎腺组织中见一灰白多结节状肿物，大小5.5×3.5×2.5cm，累及肌肉，紧邻下颌骨，距基底最近2cm，距侧切最近0.5cm。	右腮腺	1	腮腺	1	1	复发扩切，多灶，累及面神经主干颧弓髁突颞下颌关节	1	2	三次手术后1年余”			3	1	有	x	2		无	0	0	无	未报		无		2008和2010外院术后报混合瘤，2014外院术后ADCC	2016/2/2出院
Re-M		611712		6	S	3	10	10	70	10	3	100	53	1295163	谢桂英	2	2	头颈外科1	“右颌下腺样囊性癌外院两次术后” （右口咽旁复发肿物(1)） 结合病史，符合腺样囊性癌复发，可见神经侵犯。 肿瘤周边可见炎细胞浸润及异物巨细胞（缝线）反应，符合术后改变。	2016-02-03	2016-02-15 09:33:00	灰褐不整形组织大小5×3×1.5cm，切面灰白质硬。	右颌下腺	1	颌下腺	3	1	延伸烧灼缘，右咽旁复发肿物切除2cm	1	2				3	1	不确定	x	2		无	0	0	无	未报		无		2008-5右颌下、2014-9左肺下叶ADCC、2015-5右颌下复发外院切除，本次术后行放疗	2016-05-28
PM		618539		4	S	3			90	10	3	100	74	1303800	尹旗梅	2	2	头颈外科1	（1）（左口底肿物）冰及冰余 （参见618539）、（2）（左颌下腺切缘）冰 （参见618540）、（6）（左舌下腺） 被覆鳞状上皮的粘膜组织内见小涎腺来源分化差的癌浸润。肿瘤组织呈实性巢片状、筛状排列，可见多灶坏死，并见少许神经侵犯，结合免疫组化结果，形态符合腺样囊性癌，可见较多实性成分。肿瘤未累及周围横纹肌组织及左舌下腺。左颌下腺切缘未见癌。 淋巴结未见转移癌（0/13） （3）（左颈1区淋巴结） 0/3 另见涎腺组织。 （4）（左颈2区淋巴结） 0/7 （5）（左颈3区淋巴结） 0/3 pTNM分期：pT3N0 免疫组化结果显示: 618539：AE1/AE3(3+),CK7(3+),CK18(3+),CK5/6(3+),P63(灶1+),SMA(灶1+),ER(-),PR(灶1+),GCDFP15(-),Calponin(-)。	2016-03-16	2016-03-28 09:57:00	（3）结节数枚，直径0.6-0.8cm。（4）结节数枚，直径0.5-1.2cm。（5）结节数枚，直径0.4-0.7cm。（6）灰黄组织一块，大小2×1×0.5cm。切面灰黄分叶状，未见肿瘤侵犯，周围似附着少许肌肉组织，大小1.6×1×0.3cm，未见肿瘤侵犯。	左口底	1	口腔	2	1	边缘<1mm	1	1				3	1	不确定	0	0		无	0	0	无	未报		有	AE1/AE3(3+),CK7(3+),CK18(3+),CK5/6(3+),P63(灶1+),SMA(灶1+),ER(-),PR(灶1+),GCDFP15(-),Calponin(-)。		2017-3-8退药未果？电话13381171655和13501128219
P		627768		4	G	1	70	15	5	10	2	100	49	1311329	孔令暖	2	1	头颈外科2	（4）（部分喉及环状软骨） 左侧声门下腺样囊性癌，肿瘤侵透声带肌达声门旁间隙，累及环状软骨，未累及室带及甲状软骨板。（5）（气管切缘1）冰 （参见627719）、（7）（后壁切缘）冰 （参见627721）及（8）（左劈裂切缘）冰 （参见627722）均未见癌。 （6）（气管切缘2）（参见627720） 被覆假复层纤毛柱状上皮的粘膜组织，冰冻切片中未见癌，于冰冻剩余组织石蜡深切片中见一小灶癌组织浸润。 淋巴结未见转移癌（0/4） （1）（左颈3区淋巴结1）冰 0/1 （参见627705） （2）（左颈3区淋巴结2）冰 0/1 （参见627706） （3）（左颈3区淋巴结清扫） 0/2 免疫组化结果显示:AE1/AE3(3+),CD117(2+),P63(肌上皮+),Ki-67(10%+),CK7(1+),Calponin(肌上皮+)。 pTNM分期：考虑为pT4aN0，请进一步结合临床	2016-04-27	2016-05-04 17:46:00	（3）结节2枚，直径0.3-0.4cm。（4）部分甲状软骨，大小3×3×0.2cm，于左侧见粘膜及肿物，肿物大小2×1.5×2cm，切面灰黄瓷白色界不清，粘膜光滑，另见部分舌骨。	左声门下	1	喉	12	1	有R1	1	1				4a	1	不确定	0	0		无	0	0	无	未报		有	:AE1/AE3(3+),CD117(2+),P63(肌上皮+),Ki-67(10%+),CK7(1+),Calponin(肌上皮+)。	术后外院放疗	2019-12-12
P		629464		9	G	1	60	35	5		2	100	50	1311853	姜淑苹	2	1	胸外科2	（6）（左主支气管肿物（缝线处为上）） 左主支气管腺样囊性癌，侵透支气管壁全层达外膜，可见神经侵犯，未见明确脉管瘤栓。（5）（下切缘）冰 （参见629336）、（8）（上切缘）冰 （参见629372）、（9）（上切缘2）冰 （参见629406）均可见癌累及。（7）（下切缘2）未见癌。 淋巴结未见转移性癌（3/18） （1）（下肺韧带旁淋巴结（9区）） 0/2 （2）（第4区淋巴结） 0/1 （3）（隆突下淋巴结（7区）） 3/13 （4）（主动脉窗淋巴结（5区）） 0/2	2016-05-05	2016-05-11 15:57:00	（1）炭黑结节数枚，直径1cm。（2）结节一枚，大小1×1×0.5cm。（3）结节数枚，直径0.5-2cm。（4）结节一枚，直径1cm。（6）部分支气管，长2.5cm，一侧附缝线，上切缘断端直径2cm，下切缘断端直径1.5cm。粘膜面见一灰白粗糙区，范围2×1.5cm，距上切缘0.4cm，距下切缘0.5cm。（7）部分支气管组织大小0.5×0.3×0.2cm。	左主支气管	2	气管支气管	6	1	有R1，LNM	1	1				2	1	无	2	1		无	0	0	无	未报		无		手术袖切气管保留肺叶，术后放疗	2017-2-8，陆续行内镜冷冻治疗和扩张
P卓	11.5，直径60微米n内侵，ki20%	630334	2号S和B成分多	2	C	2	5	60	20	15	2	100	64	1315139	张凤祥	1	2	桓兴医院	（1）（右乳改良根治标本） 乳腺腺样囊性癌，肿瘤最大径3.3cm，可见神经侵犯，未见明确脉管瘤栓。肿瘤侵及乳头下方组织，未累及表皮及胸肌筋膜，周围乳腺未见特殊。 腋窝淋巴结未见转移癌（0/19）。 免疫组化结果显示:AE1/AE3(2+),CK5&6(2+),Calponin(1+),EGFR(3+),ER(-),HER2(1+),Ki-67(+20-30%),P63(1+),PR(-)。	2016-05-06	2016-05-14 20:18:00	右乳癌改良根治标本，大小16×15×3cm，梭皮面积10.5×4cm，乳头及皮肤质略硬，书页状切开乳腺于乳头下方见一肿物，大小3.3×2×1.6cm，肿物切面灰白实性质硬，累及皮肤及乳头，距胸肌筋膜0.5cm，周围乳腺灰白灰黄质软。腋窝脂肪找到结节数枚，直径0.4-2cm。	右乳	2	乳腺	7	1	R0，术后随诊	0	1		1	3.3cm	2	1	无	0	0		无	0	0	无	未报		有	AE1/AE3(2+),CK5&6(2+),Calponin(1+),EGFR(3+),ER(-),HER2(1+),Ki-67(+20-30%),P63(1+),PR(-)。		2018-04-09
P0		631111		5	S	3	10	20	70		3	100	35	1314157	王志刚	1	1	胸外科2	（4）（右肺中下叶） 右肺腺样囊性癌，肿瘤最大直径4cm，肿瘤主要位于中间段支气管、累及中、下叶支气管分叉处及中、下叶叶、段支气管，侵透支气管壁外膜累及支气管壁周围脂肪组织及（1）（隆突下淋巴结（7区））周围脂肪组织[免疫组化结果:AE1/AE3(1+),CD117(-),CK5&6(-),P63(-)]，未累及肺组织及脏层胸膜，可见神经侵犯，未见明确脉管瘤栓。中、下叶周围肺组织内可见灶状炭沫沉积。(2)（中间段支气管切缘）冰（参见631022）可见癌浸润。 淋巴结转移性癌（1/21） 中叶肺外支气管旁淋巴结 0/3 中叶肺内支气管旁淋巴结 0/1 下叶肺外支气管旁淋巴结 0/3 下叶肺内支气管旁淋巴结 1/5 中、下叶支气管间淋巴结 0/2 （1）（隆突下淋巴结（7区）） 0/1 （3）（4R+2R淋巴结） 0/6 免疫组化结果:CD31,CD34,D2-40(显示脉管)。 pTNM分…	2016-05-12	2016-05-23 09:52:00	（4）右肺中下叶，大小17×9×4.5cm，叶间裂发育不完全，右肺中叶大小8×4×2.5cm，右肺下叶大小13×9×4.5cm，脏层胸膜光滑，上附闭合器，沿支气管剖开肺，中间段支气管见一肿物，大小4×3×3cm，肿物累及中下叶叶支气管，未累及脏层胸膜，紧邻中间段支气管切缘，多切面切开周围肺呈海绵样，肺内外找到结节数枚，直径0.7-1.5cm，（1）炭黑结节1枚，直径1.1cm。（3）炭黑结节数枚，直径0.7-1.1cm。	中间段支气管	2	气管支气管	6	1	有R1,LNM	1	1				2	1	无	1	1		无	0	0	无	未报		有	AE1/AE3(1+),CD117(-),CK5&6(-),P63 CD31,CD34,D2-40(显示脉管)。	AE1/AE3(1+),CD117(-),CK5&6(-),P63(-)]，未累及肺组织及脏层胸膜，可见神经侵犯，未见明确脉管瘤栓。中、下叶周围肺组织内可见灶状炭沫沉积。(2)（中间段支气管切缘）冰（参见631022）可见癌浸润。 淋巴结转移性癌（1/21） 中叶肺外支气管旁淋巴结 0/3	术前化疗，术后建议放疗，2016-5-23
P		634434	实性区需与基底鳞鉴别	6	GCSB	5	30	10	35	25	3	100	47	1319338	高伟	1	1	胸外科4	（11）（右肺下叶） 右肺下叶涎腺型癌，结合形态及科内讨论意见符合腺样囊性癌，部分区域分化较差呈实性巢状，伴坏死及多灶神经侵犯。肿瘤最大径3.5cm，累及脏层胸膜、叶段支气管和肺门大血管壁。支气管切缘未见癌。周围肺呈阻塞性肺炎改变。 淋巴结转移性癌（5/22） 肺内淋巴结 2/2 （1）（下肺静脉旁淋巴结） 2/3 （2）（隆突下淋巴结（7区）） 1/3 （3）（上叶支气管旁淋巴结）冰 0/1 （参见634343） （4）（上叶支气管旁淋巴结2）冰 0/1 （参见634344） （5）（中叶支气管旁淋巴结） 0/1 （6）（上叶支气管旁淋巴结3） 0/5 （7）（中间段支气管旁淋巴结） 0/1 （8）（下叶支气管旁淋巴结） 0/1 （9）（4R区淋巴结） 0/1 （10）（2R区淋巴结） 0/3 特殊染色结果显示:弹力纤维显示受累。 免疫组化结果显示: 6号组织块：AE1/AE3(2+)…	2016-05-27	2016-06-03 09:19:00	（11）肺叶切除标本，大小11×10×5.5cm，脏层胸膜局灶粗糙，距支气管断端1.5cm，见一灰白肿物大小3.5×2×2cm，切面灰白质硬界不清，与肺门血管关系密切，累及叶段支气管，紧邻肿物见一灰黄质韧区，范围5×4×3cm。周围肺灰红质软，肺内找到结节两枚，直径0.6-0.7cm。（1）结节数枚，直径0.6-0.7cm。（2）结节两枚，直径1.2-4.5cm。（5）结节一枚，直径0.8cm。（6）结节一枚，直径2cm。（7）结节一枚，直径1cm。（8）结节一枚，直径0.8cm。（9）结节一枚，直径2cm。（10）结节两枚，直径1.5-2cm。	叶段支气管	2	气管支气管	6	1	R0,LNM	0	1				2	1	血管壁侵犯	2	1		无	0	0	无	未报		有	AE1/AE3(2+),CK5&6(2+),P40(局灶3+),P63(局部3+),Napsin-A(-),TTF1(-),Syn(-),CgA(-),Ki-67(密集区50%)	术后因纵隔LNM行化疗，2016-11可疑复发后再行化疗	2017/5-11预后差电话妻15252824088和13775488555
P		635698		3	C	2	5	65	10	20	2	100	52	1319952	冯敏山	1	2	头颈外科2	（1）（右上颌窦）、（2）（右鼻侧壁及肿瘤）、（3）（筛窦及肿瘤） 右侧鼻腔腺样囊性癌。肿瘤累及右侧上颌窦及筛窦，（4）（右侧蝶窦）未见癌。	2016-06-02	2016-06-07 11:44:00	（1）囊壁组织一堆，大小3.5×2.5×1.0cm。囊内容物已流失，囊壁厚0.1-0.2cm，内壁光滑。（2）碎组织一堆，总大小8×6×2.5cm，切面灰白局部灰黄（3）碎组织一堆，大小4×3×1.5cm。（4）灰白碎组织一堆，总大小1.8×1.8×0.6cm，全埋。	右鼻腔，鼻窦	1	鼻腔鼻窦颅底	4	1	术中未侵犯鼻中隔-鼻底-鼻咽-上颌窦-蝶窦和骨质，切除鼻腔筛窦肿物，貌似干净	1	1				3	0	不确定	x	2		无	0	0	无	未报		无		术后放疗	2019-10-16
P0		637111		2	S	3	10	5	70	15	3	100	36	1323899	孙贤林	1	1	胸外科2	（1）（气管内肿物）冰及冰余 气管腺样囊性癌，实性型>50%，肿瘤侵透气管壁全层达外膜，可见神经侵犯，未见明确脉管瘤栓。（2）（气管下切缘）冰见癌浸润，（4）（气管上切缘）冰未见癌。 （3）（上纵隔淋巴结） 纤维脂肪组织中见少量淋巴细胞，未见癌。 （参见637111-637113） 免疫组化结果显示:AE1/AE3(3+),CK5&6(2+),Calponin(外层细胞+),P63(外层细胞+),Ki-67(30%+),CD117(2+),CD56(-),CgA(-),Syn(-),TTF1(-)。	2016-06-08	2016-06-18 10:45:00	炭黑结节一枚，直径0.3cm。	气管	2	气管支气管	6	1	有R1	1	1	只看冰冻号			3	1	无	x	2		无	0	0	无	未报		有	AE1/AE3(3+),CK5&6(2+),Calponin(外层细胞+),P63(外层细胞+),Ki-67(30%+),CD117(2+),CD56(-),CgA(-),Syn(-),TTF1(-)。		建议术后放疗，2016-11-30
P	形态特殊像PA	640698		1	B原5-5-10-80	4	15	15	20	50	2	100	66	1324111	董仲奇	1	2	胸外科2	（7）（左肺上叶） 肺叶段支气管腔内见恶性肿瘤浸润，呈巢状、条索状及腺样结构分布于粘液间质中，细胞异型明显，结合形态及目前的免疫组化结果，首先考虑为腺样囊性癌。肿瘤最大径2.1cm，未累及肺实质，未见明确脉管瘤栓及神经侵犯。周围支气管粘膜可见鳞状上皮重度不典型增生/原位癌。（8）（左主支气管切缘）、（9）（下叶支气管切缘2）及（10）（下叶支气管切缘1（缝线处））均未见癌。 （2）（上叶支气管切缘）冰 （参见640669） 支气管粘膜组织中局灶见鳞状上皮原位癌，可疑间质浸润。 淋巴结未见转移癌（0/33） 肺内淋巴结 0/2 肺外淋巴结 0/10 （1）（10区淋巴结） 0/5 （3）（上叶支气管旁淋巴结） 0/2 （4）（5区+6区淋巴结） 0/7 （5）（9区淋巴结） 0/2 （6）（7区淋巴结） 0/5 免疫组化结果显示:AE1/AE3(3+),CK19(1+),CK5&6(局灶+…	2016-06-27	2016-07-04 10:18:00	（7）肺叶切除标本，大小11.8×8.5×6.2cm，肺膜表面光滑，沿支气管剖开肺，肺门处叶段支气管腔内见一肿物，大小2.1×1.3×1.1cm，切面灰白实性质硬界不清，肿物主要位于叶段支气管腔内，未累及周围肺及上叶脏层胸膜，周围肺灰红质软，局部胸膜表面见多发肺大泡形成，直径1.5-2.3cm。肺内外见炭黑结节数枚，直径0.7-1.3cm，大者切面灰黑质中，周围肺灰褐实变，范围约6×5cm。（1）炭黑结节2枚，直径0.5-1.3cm。（3）炭黑结节1枚，直径0.6cm。（4）炭黑结节数枚，直径0.4-1.6cm。（5）炭黑结节2枚，直径0.6-0.8cm。（6）炭黑结节数枚，直径0.5-1.7cm。（8）支气管壁一段，直径1.9cm，宽0.4-0.6cm。（9）灰白软骨样组织，长0.3cm，宽0.2cm。（10）支气管壁，长2.2cm，宽0.7cm。	支气管	2	气管支气管	6	1	上叶支气管切缘可见原位癌	1	1		1	2.1cm	1	1	无	0	0		无	0	0	无	未报		有	AE1/AE3(3+),CK19(1+),CK5&6(局灶+),Calponin(-),Ki-67(60%),P40(-),P63(-),S100(2+),TTF1(-),CD117(2+)。		2018-03-01
P		644772		1	GCSB	5	10	40	20	30	2	100	35	1329236	商志军	1	1	头颈外科1	（1）（右侧上颌骨） 上颌窦腺样囊性癌，主要呈筛状型，部分呈实体型，可见神经侵犯，未见明确脉管瘤栓。肿瘤大小5×4×4cm，侵犯上颌骨、（2）（翼突）及（3）（眶骨膜）。（5）（框内侧壁切缘）冰、（7）（右侧鼻咽侧壁切缘）冰、（8）（鼻根部切缘）冰可见腺样囊性癌浸润。（4）（筛窦切缘）冰、（6）（翼突根部组织）冰、（9）（鼻翼旁切缘）冰、（10）（蝶窦粘膜）冰、（11）（右侧鼻咽侧壁切缘2）冰、（12）（鼻根部切缘2）冰、（13）（框内侧壁切缘2）冰 均未见癌。 pTNM分期：pT3（请结合临床） （参见644637、644634、644633、644609、644608、644606-644602）	2016-07-14	2016-07-25 08:55:00	（1）部分上颌骨及肿物切除标本，总大小7×6×3cm，附牙齿6颗，上颌窦内见一菜花样肿物，大小5×4×4cm，切面灰白粗颗粒状，质偏软，局灶可见出血及囊性变，未见明确坏死，与上颌骨关系不清。（2）灰红破碎组织一堆，总大小2×2×1cm，质硬。（3）灰红组织一粒，直径0.3cm。	右上颌窦	1	鼻腔鼻窦颅底	4	1	有R1	1	1		1	5cm	3	1	无	x	2	上颌骨	无	0	0	无	未报		无		术后放疗	2017-02-27
P赵大芬-卓	16；直径50微米两处神经，一处围，一处疑	656430		3	S	3		10	90		3	100	40	1340323	赵大芬	2	1	乳腺外科1	“左乳微创旋切术后” （1）（左乳单纯切除标本） 乳腺浸润性癌，结合形态及免疫组化结果符合腺样囊性癌。肿瘤大小1×1×0.8cm，未累及乳头、皮肤，邻近胸肌筋膜，胸肌筋膜及周围横纹肌组织内伴有炎细胞浸润，局灶可见神经侵犯，未见明确脉管瘤栓；癌旁伴有纤维组织增生及炎细胞浸润，符合术后改变。周围乳腺呈腺病改变。 淋巴结未见转移癌（0/9）。 （2）（前哨淋巴结1）冰 0/1（参见656290） （3）（前哨淋巴结2）冰 0/1（参见656291） （4）（前哨淋巴结3）冰 0/1（参见656292） （5）（前哨淋巴结4）冰 0/1（参见656293） （6）（前哨淋巴结5）冰 0/1（参见656294） （7）（前哨淋巴结6）冰 0/1（参见656296） （8）（前哨淋巴结7）冰 0/1（参见656297） （9）（前哨淋巴结8）冰 0/1（参见656298） （10）（前哨淋巴结9）冰…	2016-09-08	2016-09-18 10:25:00	左乳单纯切除标本，乳腺组织大小18×14×4cm，梭皮面积11×4cm，乳头未见明显异常，距乳头0.8cm，可见一陈旧性手术瘢痕，瘢痕下可见一皱缩区，其中有一缺损，缺损旁可见质硬肿物，大小0.8×1×1cm，切面灰白实性质硬，界尚清。紧邻胸肌筋膜，周围乳腺灰黄质软。	左乳	2	乳腺	7	1	外院局切后扩大单纯切，R0	0	1		1	1	1	1	无	0	0		无	0	0	无	未报		有	ER(-),PR(-),HER2(-),CD117(2+),P63(灶+),E-cadherin(1+),Ki-67(+35%)；肌上皮 CD10(-),calponin(-)。
P0改号	分化较好？核分裂低	660956		3	S	3	10	15	65	10	3	100	53	1345669	骆凤侠	2	2	头颈外科1	（1）（腮腺尾部肿物）冰及冰余（参见660956） 涎腺上皮性肿瘤，肿瘤大小3×2×2cm，浸润性生长，结合免疫组化结果，符合腺样囊性癌。 腮腺周围淋巴结未见转移癌（0/6）。 免疫组化结果: AE1/AE3(3+),CK5&6(2+),CK7(2+),Ki-67(+，20%),P63(3+),S100(2+)。 （2）（颌下清扫） 颌下腺组织，未见肿瘤。 备注：本例经2016-10-14科内会诊达成上述诊断意见。	2016-10-09	2016-10-14 10:43:00	涎腺组织大小3.5×3×2cm，切面未见明显结节及质硬区，周围少量脂肪组织内未见明显淋巴结。	腮腺	1	腮腺	1	1	术中见位于颌下腺和腮腺尾部之间，未单送切缘	0	1		1	3	2核实大小实质外	0	不确定	x	2		无	0	0	无	未报		有	AE1/AE3(3+),CK5&6(2+),CK7(2+),Ki-67(+，20%),P63(3+),S100(2+)。		2016-10-18
P		662822		4	GCSB	5	10	40	10	40	2	100	58	1347647	纪恩兴	1	2	头颈外科2	（1）（气管肿物） 腺样囊性癌，肿瘤累及气管软骨，侵达气管壁外的纤维脂肪组织。肿瘤累及气管壁周围切缘。	2016-10-17	2016-10-21 19:35:00	气管一段，长1.5cm-2.8cm，切缘直径2.5cm，气管壁内见一肿物，大小2.7×2.3×2cm，切面灰白实性，质硬，紧邻气管侧切缘，侵达气管壁外纤维脂肪组织。	气管	1	气管支气管	6	1	气管切除5环张力大，无法保留足够切缘	1	1				3	1	不确定	x	2		无	0	0	无	未报		无		扩切，术后放疗	2018-10-10
P	贴近神经一侧	664823		4	C	2	10	70	10	10	2	100	55	1346067	刘文和	1	2	胸外科1	（4）（气管肿物） 气管腺样囊性癌，侵透气管壁全层达外膜，未见明确脉管瘤栓及神经侵犯。（6）（气管上切缘）冰及（7）（气管下切缘）冰（参见664764-664765）未见癌。 淋巴结未见转移癌（0/7） （1）（奇静脉弓上淋巴结） 0/2 （2）（气管旁淋巴结） 0/1 （3）（3A淋巴结） 0/1 （5）（7区淋巴结） 0/1 （8）（4R淋巴结） 0/2 免疫组化结果显示:CD117(2+),CD56(-),CK7(3+),Calponin(1+),CgA(-),P63(2+),Syn(-),Ki-67(+20%)。	2016-10-25	2016-11-01 20:03:00	（1）结节两枚，直径0.4-0.6cm。（2）结节一枚，直径0.8cm。（3）结节一枚，直径0.6cm。（4）气管一段，长2cm，多切面切开，于气管壁内见一肿物，大小2×1×2cm，切面灰白实性，质硬，界不清，累及部分气管粘膜。（5）结节一枚，直径0.6cm。（8）结节两枚，直径0.3-0.4cm。	气管	2	气管支气管	6	1	上下切阴性，但侵犯气管外壁	1	1				3	1	无	0	0		无	0	0	无	未报		有	:CD117(2+),CD56(-),CK7(3+),Calponin(1+),CgA(-),P63(2+),Syn(-),Ki-67(+20%)。	扩切	2017-02-17
R陈常梅		670684		8	GCSB	5	40	15	30	15	3	100	37	1018849	陈常梅	2	1	头颈外科1	2016年11-17复发手术 “筛窦癌外院术后” （5）（上颌窦组织）、（6）（面部软组织）、（7）（眶内肿物及部分眶底壁）、（8）（筛窦）、（9）（右部分上颌骨及右侧鼻侧壁） 以上组织中可见腺样囊性癌弥漫浸润，肿瘤侵及神经，可见脉管瘤栓及骨质受侵。 2012年2-2扩切病理号416406 （1）（内眦皮下组织）冰 （参见670593） 增生的纤维组织中见极少许异型细胞团，经连切后消失。（2）（眶下皮下组织）冰 （参见670594）、（3）（内眦瘢痕组织）冰 （参见670595）、（4）（面部皮下肿物）冰 （参见670602）内可见腺样囊性癌浸润。	2016-11-07	2016-11-28 14:53:00	（5）灰褐灰白破碎不整形组织一堆，大小2.7×3×0.5cm，切面灰白灰褐实性，触及少许骨质，直径1.0cm。（6）灰白不整形组织一块，大小1.7×0.2×0.3cm，质韧全埋。（7）灰白不整形组织一块，大小4×2.3×1.5cm，切面灰白实性质韧，似为肿物，另附游离骨质一块，大小1.2×0.6×0.6cm。（8）破碎骨质一堆，总大小4×0.6×0.5cm。（9）部分上颌骨及周围软组织切除标本，大小4.2×3×2.5cm，上颌骨表面见一灰白肿物，大小3×2.5×1cm，累及骨质。	筛窦，上颌窦	1	鼻腔鼻窦颅底	4	1	有	1	2	4.5年			4a	1	有	x	2	面部，眼眶，上颌骨	无	0	0	无	未报		无		溢泪2年余，2011-12-20右泪道外院活检，2012-2-2本院第一次手术，术后未治，2016-5右鼻堵留脓涕，11-3核磁复发	2019-09-16
P		675818		8	GCSB	5	40	10	10	40	2	100	61	1351398	周保连	2	2	胸外科2	（6）（气管肿物） 气管腺样囊性癌，侵透气管壁全层达外膜，可见神经侵犯。（4）（下切缘）冰 、（5）（上切缘）冰未见肿瘤。 淋巴结未见转移癌（0/19） （1）（10区淋巴结） 0/1 （2）（4R淋巴结） 0/4 （3）（4R+2R淋巴结） 0/7 （7）（7区淋巴结） 0/7	2016-12-18	2016-12-16 09:08:00	（1）炭黑结节一枚，直径0.5cm。（2）炭黑结节两枚，直径0.7-1.5×1×0.3cm。（3）炭黑结节数枚，直径0.9-大小2×1.7×0.5cm。（7）炭黑结节两枚，直径1.2-大小3×1×0.5cm。（6）部分气管组织，长1.7cm，切缘宽2cm及2.2cm，紧邻切缘，支气管腔内见一隆起型肿物，大小2.2×1.2×1.4cm，表面光滑。	气管	2	气管支气管	6	1	上下切阴性，但侵犯气管外壁	1	1				3	1	不确定	0	0		无	0	0	无	未报		无			2017-6-10随诊
P		681042		4	C	2	10	80	10		2	100	39	1361481	李小排	2	1	胸外科2	（10）（右肺中下叶）、（11）（右肺上叶） 肺腺样囊性癌，肿瘤大小4.8×4×2cm，主要位于右肺下叶根部，累及右主支气管、中间段支气管、下叶叶段支气管及中叶叶支气管，未累及脏层胸膜、上叶支气管开口及上叶叶段支气管。可见神经侵犯，未见明确脉管瘤栓。右肺上、中、下叶周围肺均呈轻度肺气肿改变。 （8）（右主支气管切缘2） 及（9）（右主支气管切缘3）均未见癌。 （6）（右主支气管切缘（缝线处））冰 （参见680995） 支气管壁内见腺样囊性癌浸润，冰冻组织石蜡连切片癌组织消失。 淋巴结转移性癌（4/27），未累及淋巴结被膜外。 右肺下叶肺外淋巴结 1/2 右肺下叶肺内淋巴结 2/2 右肺上叶肺内淋巴结 0/3 右肺上叶肺外淋巴结 0/2 （1）（9区淋巴结） 0/1 （2）（肺门淋巴结（10区）） 0/3 （3）（隆突下淋巴结（7区）） 0/3 （4）（中叶支气管旁淋巴结（11区）） 1/…	2016-12-30	2017-01-09 11:22:00	（10）右肺中下叶袖状切除标本，中叶大小8×6×3.5cm，下叶大小13.5×8×3cm，叶间裂发育完全，沿支气管剖开肺，于下叶肺根部见一肿物，大小4.8×4×2cm，切面灰白半透明质中，累及中间段支气管、下叶叶段支气管及中叶叶支气管，未累及上叶支气管开口，周围肺灰红质软。下叶肺外找到结节1枚，直径1.5cm。（11）肺叶切除标本，大小13×9×3cm，沿支气管剖开肺，叶段支气管粘膜光滑，多切面切开肺组织灰红质软，未见明确肿物及质韧区，肺内外找到结节数枚，直径0.5-0.8cm。（1）结节数枚，直径均为1cm。（2）结节数枚，直径0.3-0.5cm。（3）结节数枚，直径0.5-大小3×1.2×0.6cm。（4）结节2枚，直径1-1.5cm。（5）结节2枚，直径1.5-2.5cm。（7）结节数枚，直径0.8-2cm。（8）气管壁组织一段，长1.5cm，宽0.3cm，（9）气管壁一段，长3c…	叶段支气管	2	气管支气管	6	1	有R1,LNM	1	1				3	1	无	1	1		无	0	0	无	未报		有	CD117(1+),CK7(腺上皮+),Calponin(肌上皮+),Ki-67(+10%),P63(肌上皮+)。	术后化疗	2017-10-19
P		681169		10	SG	5	40	10	50		3	100	54	1362339	陈英	2	2	胸外科1	（6）（部分气管下段及肿物） 气管腺样囊性癌，侵透气管壁全层，大小2×2×0.8cm，可见神经侵犯，未见明确脉管内癌栓。肿瘤侵及气管切缘。 （8）（右肺上叶楔形切除标本）、（7）（右肺上叶结节）冰 （参见681040） 腺癌，高分化，最大径0.4cm（参见冰冻片，石蜡切片病变减少），未累及脏层胸膜。肺切缘净。 （2）（皮肤痣） 皮内痔，各侧切缘及基底切缘已切净。 （1）（舌骨） 骨组织。 淋巴结未见转移性癌（0/7） （3）（7区淋巴结） 0/2 （4）（4R+2R区淋巴结） 0/4 （5）（左气管食管沟淋巴结） 0/1	2016-12-30	2017-01-09 15:01:00	(1)舌骨大小5×1.5×1cm，肉眼未见明显病变。 (2)皮肤组织一条，大小6×1×0.5cm，皮肤中央略隆起，大小0.5×0.4×0.2cm，灰白质稍韧，局限于皮内。(3)灰黑结节两块，小者大小1×1×0.3cm，大者大小2×1×0.3cm。 (4)结节数枚，直径0.4-0.8cm。 (5)灰红组织一粒，直径0.2cm。(6)气管一段，长3.5cm，管径2cm，气管腔内一侧见偏心性增厚，大小2×2×0.8cm，灰白质细界不清，距一侧切缘最近0.3cm。(8)部分肺组织，大小2×7×1cm，周围见闭合器，一侧见断面，多切面切开，肺组织灰红质软，未见明确肿物。	气管	2	气管支气管	6	1	扩切，有RI	1	1				3	1	无	0	0		无	0	0	无	未报	右肺上叶高分化腺癌0.4cm	无		术后放疗	2019-01-07
R-冯照花一次病例		683580		9	C	2	30	60	10		2	100	53	1057077	冯照花	2	2	头颈外科1	“喉部腺样囊性癌术后” （11）（全喉）、（2）（喉内肿物）冰 （参见683279）、（13）（舌根切缘2）冰 （参见683345） 残喉组织中仍可见腺样囊性癌浸润。肿瘤侵犯双侧声门旁间隙，并累及甲状软骨及双侧杓状软骨，直接侵犯颈前横纹肌及皮下组织；累及舌根周围软组织。舌根切缘2、下切缘均未见癌。 （1）（左颌下淋巴结）冰（参见683275） 纤维脂肪组织中见腺样囊性癌浸润，未见淋巴结结构。周边见少许横纹肌组织。 （12）（舌根切缘）冰 （参见683333） 被覆鳞状上皮的粘膜组织边缘见少许癌组织浸润。 淋巴结转移性癌（5/54） 颈前淋巴结 0/1 （3）（左颈2a区淋巴结） 3/10 周围见癌结节，累及周围横纹肌及皮下组织。另见少许涎腺，未见肿瘤侵犯。 （4）（左颈2b区淋巴结） 0/2 （5）（左颈3区淋巴结） 0/8 （6）（左颈4区淋巴结） 0/4 （7）（右颈2a区淋巴结） …	2017-01-11	2017-01-18 18:39:00	（11）残喉切除标本，大小7×6×2cm，未见会厌软骨。上缘可见大量闭合器，双侧声门结构欠清，附气管一段，长5cm，气管表面可见气管切开开口。喉内见灰白色半透明质硬区，范围2.5×2×2.2cm，与周围界限不清，累及上端粘膜下组织。上端粘膜下组织增厚质硬，范围3×2×1cm，切面灰黄，似为肿瘤侵犯。（3）脂肪一堆，结节数枚，直径0.4-1.5cm，另触及一灰黄界限不清的质硬区，大小2.5×1.5×1.2cm。（4）脂肪一堆，结节两枚，直径0.3-0.4cm。（5）脂肪一堆，结节数枚，直径0.3-0.4cm。（6）脂肪一堆，结节数枚，直径0.3-0.5cm。（7）脂肪一堆，结节多枚，直径0.4-1.8cm。（8）脂肪一堆，结节两枚，直径0.6-0.8cm。（9）脂肪一堆，结节多枚，直径0.3-0.8cm。（10）脂肪一堆，结节数枚，直径0.3-0.6cm。	会厌喉面	1	喉	12	1		1	2	3年			4a	1	不确定	3核实淋巴结被膜受累？	1		无	0	0	无	未报		无		声嘶一年余，2012-9-5第一次水平部分喉手术，2016年初左右开始出现进行呼吸困难，2016-12-27核磁复发	2019-03-27
P	形态特殊像PA，有瘤栓	684583	癌旁上皮伴鳞状原位癌	2	SB	5		5	55	40	3	100	53	1366571	张晓玲	2	2	妇科3	“补充病史：子宫肌瘤外院子宫次全切除术后” （11）（残存广泛宫颈标本）、（12）（左宫旁组织） 宫颈分化差的癌，肿瘤大2×1.6×0.7cm，伴黏液样间质，可见脉管瘤栓，累及宫颈间质0.7cm(宫颈全层厚约1.4cm)，结合肿瘤组织形态及免疫组化结果，考虑为腺样囊性癌,癌旁宫颈HSIL（CIN3）部分累腺。未见明确神经侵犯，未累及宫旁组织，残存宫颈断端及阴道断端均未见癌。 （1）（左附件及左圆韧带残端） 左卵管及左卵巢组织，另见纤维结缔组织，未见癌。 （2）（右附件及右圆韧带残端） 右卵管及右卵巢组织，另见纤维结缔组织，未见癌。 淋巴结未见转移癌（0/29） （3）（右腹股沟深淋巴结） 0/3 （4）（右髂外淋巴结） 0/3 （5）（右闭孔淋巴结及右髂内淋巴结）0/4 （6）（右髂总淋巴结） 0/1 （7）（左腹股沟深淋巴结） 0/5 （8）（左髂外淋巴结） 0/4 （9）（右闭孔淋巴…	2017-01-16	2017-01-25 10:01:00	（11）宫颈组织，长3cm，切缘宽6cm，下附阴道，长1-3.3cm，切缘宽11cm，于宫颈约6-12点处见一溃疡型肿物，大小2×1.6×0.7cm，切面灰红灰白质略韧界不清，肿物侵及宫颈壁大于二分之一，未累及阴道穹窿。（1）灰红组织一块，大小5×4×2.5cm，左附件结构不清，疑似输卵管一段，长2cm，直径0.3-0.5cm，疑似卵巢组织，大小3×2×1cm。（2）右卵管长6cm，直径0.5cm，伞开，右卵巢大小3×2×1cm，灰白灰红质韧。（3）结节一枚，大小2×2×0.4cm。（4）结节数枚，大小0.6×0.4×0.2-0.8×0.6×0.3cm。（5）结节数枚，直径0.4-大小2×1×0.4cm。（6）结节一枚，大小1×0.6×0.4cm。（7）结节数枚，大小均1×0.6×0.4cm。（8）结节数枚，直径0.3-大小1.2×0.4×0.3cm。（9）结节数枚，大小0.4×0.3×…	宫颈	2	宫颈	15	1	R0,ki-67-70%	0	1				1b	0	有	0	0		无	0	0	无	未报		有	P16(3+),CK18(2+),EMA(2+),BCL2(3+),NSE(2+),CD117(+),CD56(2+),Ki-67(+，70%),CD10(-),CK7(-),CgA(-),Syn(-),TTF1(-),CK34βE12(-),CK5&6(-),P40(-),P63(-),Calponin(-),SMA(-)。	术后放化疗	2017-07-19
P		686090		2	SB原15-5-40-40	5	30	10	30	30	3	100	48	1369001	刘素英	2	1	头颈外科2	“外院鼻咽肿物活检术后” （1）（鼻咽病灶） 鼻咽腺样囊性癌，肿瘤镜下最大径1.6cm，小灶侵及横纹肌组织。（2）（左侧切缘）及（3）（下切缘）均未见癌。 pTNM分期：pT1（请结合临床所见）	2017-01-22	2017-01-26 09:59:00	（1）灰褐不整形组织，大小4×3×1.5cm，局灶附粘膜，切面灰粉实性质中。（2）灰褐组织一块，大小1×1×0.3cm。（3）灰褐组织一块，大小1.2×0.6×0.3cm。	鼻咽	1	鼻腔鼻窦颅底	4	2	鼻咽肿物扩大切，送检切缘阴性，切片距离烧灼缘<1mm	1	1				1	0	不确定	x	2		无	0	0	无	未报		无		术后因呼吸困难如ICU一天，术后放疗	2017-10-16
P		694556		8	S	3	10	30	50	10	3	100	55	1374986	万秀红	2	2	头颈外科1	（1）（左上颌骨及肿瘤） 上颌窦腺样囊性癌，呈筛状型及实体型，可见神经侵犯，未见明确脉管瘤栓。肿瘤大小4×4×2.5cm，侵犯上颌骨骨质、硬腭及牙龈组织，紧邻左侧牙龈切缘、磨牙后牙龈切缘、硬腭后切缘、硬腭中线切缘，未累及牙龈前侧切缘、硬腭前切缘，（2）（筛窦）、（3）（碟窦）未见癌。 免疫组化结果显示:CD117(2+),CK7(3+),Calponin(1+),P63(1+)。	2017-03-09	2017-03-17 14:50:00	（1）左上颌骨切除标本，于左上颌窦内见一灰黄灰白肿物，质中，略呈胶冻样，大小4×4×2.5cm，另见牙齿7颗，第八颗磨牙疑似缺损，于第六颗至磨牙后牙龈肿胀，粘膜尚光滑。（2）灰褐不整形组织一堆，总大小2×1×0.8cm。（3）灰白组织一块，大小0.8×0.4×0.2cm。	上颌窦	1	鼻腔鼻窦颅底	4	1	紧邻切缘	1	1				2	1	无	x	2	上颌骨，硬腭	无	0	0	无	未报		有		术后放疗	2017-06-14
P		699978		5	GCSB	5	10	40	10	40	2	100	50	1380260	谭磊	2	1		（6）（舌口底下颌骨切除） 口底腺样囊性癌。肿瘤最大径6.0cm，侵犯周围横纹肌组织及脂肪组织，未累及下颌骨，可见神经侵犯，未见明确脉管瘤栓。（3）（下齿槽神经断端）冰 、（4）（舌神经断端）冰 未见癌。（参见699627、699629）） （7）（下颌骨内侧神经组织）冰 （参见699709） 神经组织中见癌组织浸润，符合腺样囊性癌。。 淋巴结未见转移性癌（0/5）。 （1）（面前淋巴结1）冰 0/1 （参见699585） （2）（面前淋巴结2）冰 0/1 （参见699586） （5）（左颈2区淋巴结） 0/3 pTNM分期：pT3N0（请结合临床）	2017-03-30	2017-04-08 12:02:00	（6）不整形软组织一块，大小6×5×2.5cm，局灶似有包膜，切面灰白质韧，部分略呈胶冻样，附部分下颌骨，大小4.5×4×2.5cm，内侧附粘膜及软组织，未见明确肿物。（5）结节数枚，直径0.5-1cm。	口底	1	口腔小涎腺比舌下腺靠外	2	1	累及颌下腺，距边缘<1mm	1	1				4	1	无	0	0		无	0	0	无	未报		无		术后外院放疗3次因伤口未愈感染中断，2018-7舌根复发，2018-10-10复发灶切除基底有癌	2019-12-09
Re-0		700733		5	S	3	10		90		3	100	45	1382110	陈超	1	1	头颈外科1	“左上腭腺样囊性癌术后” （3）（左眶内侧壁肿物）、（4）（右侧额窦肿物）、（5）（左筛窦前颅底复发肿物）、（1）（钛板周围组织）冰及冰余（参见700612）、（2）（左颞下窝组织）冰及冰余（参见700614） 左筛窦前颅底腺样囊性癌，结合病史，符合术后复发。肿瘤累及左眶内侧壁及右侧额窦；未累及左筛窦前颅底内游离骨质、钛板周围组织及左颞下窝组织。	2017-04-05	2017-04-11 11:27:00	（3）灰红灰白组织一块，大小2×2×0.8cm，质硬全埋。（4）灰褐结节一枚，直径1.5cm，质硬全埋。（5）灰白灰褐肿物，大小4×3.5×2cm，质硬粗颗粒感。并见游离骨及软骨组织一块，大小3.5×3.5×1.5cm。另见游离金属支架一块。	左上腭，鼻窦	1	口腔（上腭）	5	1	复发累及筛窦额窦近眶尖，广泛	1	2				4	0	有	x	2	眼眶，鼻腔鼻窦	无	0	0	无	未报		无		2016-4外院上腭术后放疗	2017-04-12
P卓	3，ki5%	706368		2	GCSB	5	40	40	10	10	2	100	50	1391175	王晓燕	2	1	乳腺外科1	（1）（左乳癌扩切标本） 乳腺浸润性癌，结合免疫组化染色，符合腺样囊性癌，肿瘤大小1.5×1×1cm，未见明确脉管瘤栓及神经侵犯；周围乳腺组织呈腺病改变，皮肤及侧切缘、（冰7）（内切缘）（参见706161）、（冰8）（外切缘）（参见706163）、（冰9）（下切缘）（参见706164）及（冰10）（上切缘）（参见706165）均未见癌。 淋巴结未见转移癌（0/6） （冰1）（前哨淋巴结1） 0/1（参见706145） （冰2）（前哨淋巴结2） 0/1（参见706146） （冰3）（前哨淋巴结3） 0/1（参见706147） （冰4）（前哨淋巴结4） 0/1（参见706148） （冰5）（前哨淋巴结5） 0/1（参见706149） （冰6）（前哨淋巴结6） 0/1（参见706150） pTNM分期：pT1cN0 免疫组化结果显示：HER2(-)，ER(+<5%，中阳)，PR(-)，AR(+…	2017-04-27	2017-05-08 19:44:00	（1）梭皮及乳腺组织，梭皮大小9×1cm，乳腺组织大小6×4×3.5cm，切面乳腺内见灰白肿物，大小1.5×1×1cm，肉眼距基底切缘最近0.3cm，距皮肤最近2.5cm。	左乳	2	乳腺	7	1	R0	0	1		1	1.5	1	0	无	0	0		无	0	0	无	未报		有		建议术后放疗	2019-04-16
Re-0		711604		1	S	3	10	10	80		3	100	54	1392769	梁运芝	2	2	头颈外科1	“右颌下腺样囊性癌外院术后” （冰1）（右口底肿物） 结合病史，形态符合腺样囊性癌，可见神经侵犯，未见明确脉管瘤栓。累及周围横纹肌组织。局部累及切除组织边缘。	2017-05-18	2017-05-23 15:33:00	（冰1）灰红不整形组织一块，大小2.8×2×1.8cm，切面灰白质中偏韧。	右颌下腺，右口底	1	颌下腺	3	1	有R1，复发扩大切	1	2				3	1	无	x	2		无	0	0	无	未报		无		4年前手术后化疗,复发术后建议放疗	2017-06-26
Re		711803		7	C	2	5	90	5		2	100	34	1315077	刘卫平	2	1	头颈外科2	“舌根腺样囊性癌术后1年” （4）（大部分舌及舌根）（冰6）（扁桃体切缘）（冰7）（舌根后切缘）（冰8）（舌背切缘）（冰9）（右前口底切缘）（冰10）（基底后切缘）（冰11）（基底前切缘）（参见711432、711437-711441） 舌组织中仍可见腺样囊性癌浸润；另见散在分布的异物（缝线）及异物巨细胞反应，结合病史，符合复发。肿瘤大小2.0×1.5×0.3cm，累及横纹肌。扁桃体切缘、舌根后切缘、舌背切缘、右前口底切缘、基底后切缘及基底前切缘均未见癌。 淋巴结未见转移癌（0/8） （冰1）（颏下淋巴结1） 0/1（参见711406） （冰2）（颏下淋巴结2） 0/1（参见711407） （冰3）（颌下淋巴结1） 0/1（参见711408） （冰4）（颌下淋巴结2） 0/1（参见711409） （冰5）（颌下淋巴结3） 0/1（参见711410） （1）（颏下淋巴结清扫） 0 纤维血管…	2017-05-18	2017-05-24 11:51:00	（1）脂肪组织一块，大小1.5×0.5×0.5cm，未触及明确结节，全埋。（2）脂肪一堆，结节一枚，直径0.5cm，另见涎腺组织，大小3.5×3×2cm，多切面切开，切面灰黄分叶状，未见明确灰白肿物及质硬区。（3）脂肪一堆，结节2枚，直径1.2-2cm。（4）部分舌切除标本，大小7×6×3cm，距舌根切缘1.5cm，舌背部局灶粘膜粗糙，范围1×1cm，粗糙粘膜下见一灰白质稍韧区，大小2×1.5×0.3cm，界不清，质中，累及舌肌。	舌根	1	舌根小涎腺	2	1	复发切除，送切缘干净	0	2	1年			1	0	无	0	0		无	0	0	无	未报		无		2016-5-16外院舌根手术R1，复发术后行放疗	2019-07-06
P		714087		3	G	1	50	10	20	20	2	100	48	1390145	陈保伏	1	1	头颈外科1	（冰1）（腭部肿物） 涎腺来源的肿瘤，肿瘤细胞具有双层上皮分化，呈小管状、条索状及局灶筛状结构，冰余制片显示肿瘤基底不规则，边界欠清，可见神经侵犯。结合免疫组化结果，符合腺样囊性癌，以管状型为主。肿瘤侵犯腭部粘膜伴溃疡形成，未见明确脉管瘤栓。肿瘤紧邻局灶基底切缘（相距<1mm）。 免疫组化结果显示：CK7(腔面上皮+)，CK5/6(2+)，Calponin(肌上皮+)，P63(肌上皮+)，Laminin(1+)，S-100(灶状+)，Ki-67(20%+)。	2017-05-26	2017-06-06 18:57:00	（冰1）灰红组织，大小3.5×2.5×1cm，一侧为粘膜面，粘膜面粗糙，局部隆起，面积2.5×2，取部分隆起区冰冻。	腭部	1	口腔（上腭）	5	1	基底<1mm	1	1				核实浸润深度等	1	不确定	x	2		无	0	0	无	未报		有	K7(腔面上皮+)，CK5/6(2+)，Calponin(肌上皮+)，P63(肌上皮+)，Laminin(1+)，S-100(灶状+)，Ki-67(20%+)。	术后放疗	2019-03-08
P		715308	5号B成分多	5	S	3		10	60	30	3	100	30	1397962	李秋平	1	1	胸外科2	（4）（右肺中下叶） 结合形态及免疫组化，符合肺腺样囊性癌，肿瘤位于支气管腔内并侵及周围肺，大小5.6×2.7×1.5cm，可见脉管瘤栓，未见明确神经侵犯，未累及脏层胸膜。支气管切缘未见癌。下叶周围肺呈轻度肺气肿改变，中叶周围肺间质纤维化。 淋巴结未见转移性癌（0/18） （1）（9区淋巴结） 0/2 （2）（7区淋巴结） 0/4 （3）（4R区淋巴结） 0/6 中间段支气管旁淋巴结 0/2 下叶肺外淋巴结 0/1 下叶肺内淋巴结 0/1 中叶肺外淋巴结 0/2 pTNM：pT2bN0 免疫组化结果显示：AE1/AE3(3+)，SMA(-)，P63(肌上皮+)，CK5/6(肌上皮+)，CK 34βE12(3+)，Syno(-)，ChrA(-)，Ki-67(+,40%阳)。	2017-06-02	2017-06-12 13:40:00	（1）炭黑结节两枚，直径0.4-0.6cm。（2）炭黑结节，直径2.7×1.5×0.6cm。（3）炭黑结节数枚，直径0.4-0.8cm。（4）右肺中下叶切除标本，下叶大小13×11×5cm，中叶大小10×6×3cm，中间段支气管直径2cm，长1.2cm，距中间段支气管切缘0.7cm，支气管腔内可见一结节状隆起型肿物，肿物大小5.6×2.7×1.5cm，切面灰白质硬韧，主要位于下叶叶支气管腔内累及中间段支气管及下叶段支气管，并累及中叶叶段支气管管壁。多切面切开周围肺下叶及中叶肺组织灰红质软，局灶可见扩张支气管。肺内外找到结节数枚，直径0.3-0.7cm。	支气管	2	气管支气管	6	1	R0，LN阴性	0	1		1	5.6		1	不确定	0	0		无	0	0	无	未报		有	免疫组化结果显示：AE1/AE3(3+)，SMA(-)，P63(肌上皮+)，CK5/6(肌上皮+)，CK 34βE12(3+)，Syno(-)，ChrA(-)，Ki-67(+,40%阳)。		2019-08-21
Re-0		716648		3	C	2		100			2	100	56	1396228	王玉贤	2	2	头颈外科2	17-06631（“左侧口底舌下肿物”） 涎腺腺样囊性癌（筛状型）； 送检切片未显示边缘与正常组织的切缘情况。“左舌下腺腺样囊性癌术后” （1）（左口底肿瘤） 腺样囊性癌，肿瘤大小5×2.3×2cm，可见神经侵犯，未见明确脉管瘤栓。肿瘤累及小涎腺及周围纤维脂肪组织，未累及鳞状上皮粘膜及周围横纹肌组织。（冰1）（舌神经切缘）（参见716580）、（冰2）（舌下神经切缘）（参见716581）、（冰3）（后基底切缘）（参见716582）、（冰4）（前基底切缘）（参见716583）、（冰5）（前切缘）（参见716584）、（冰6）（后切缘）（参见716585）未见癌。 淋巴结未见转移癌（0/17）。 （2）（左颈2区淋巴结） 0/6 （3）（左颈3区淋巴结） 0/11	2017-06-08	2017-06-14 07:09:00	（1）灰褐不整形组织，大小5.5×3×2.5cm，切面见一灰粉结节状肿物，大小5×2.3×2cm，质偏细界欠清。（2）结节数枚，直径0.3-0.8cm。（3）结节数枚，直径0.2-0.8cm。	左舌下腺	1	舌下腺	2	1	送检无，但肿瘤5cm，距烧灼缘<1mm	1	2	1年				1	无	0	0		无	0	0	无	未报	肺早癌可能	无		15个月前外院左舌下肿物切除，术后建议放疗	2017-06-28
P0		716763		5	SC	5		50	50		3	100	58	1395903	张福万	1	2	神外组1	（1）（左颞部肿物） 耳部皮肤真皮及皮下见腺样囊性癌组织浸润，少部分区域呈实体型结构，伴多灶性坏死。肿瘤累及软骨及骨质，并侵犯脑膜。 （冰1）（左颞肌切缘）（参见716579） 纤维脂肪及横纹肌组织。横纹肌组织边缘见少许异型腺体浸润，形态与主体肿瘤相似（716763），符合癌组织浸润。 免疫组化结果显示：AE1/AE3(3+)，CK5/6(-)，P63(-)，P40(-)，CD117(1+)，S-100(1+)，Calponin(-)，SMA(-)。	2017-06-08	2017-06-17 16:29:00	（1）破碎不整形组织一堆，总大小10.5×4.5×1.5-4.5cm，一侧可见耳朵，切面于外耳道下软组织见一灰白肿物，大小4×3×1.5cm，切面灰白，似累及外耳道软骨，另见膜样物一片，大小4.5×2.5×1.5cm，一侧附灰白肿瘤组织，一侧光滑。另见破碎游离骨组织，骨组织表面糟脆，被肿瘤侵犯。	左颞部	1	中颅底（颞骨岩部）	20	1	有	1	1					1	不确定	x	2	脑膜	无	0	0	无	未报		有	AE1/AE3(3+)，CK5/6(-)，P63(-)，P40(-)，CD117(1+)，S-100(1+)，Calponin(-)，SMA(-)。	半年前左颞皮下隆起，术前1月前左面瘫	2017-06-28
P		723871		3	S	3	10		90		3	100	64	1394463	朱满华	2	2	头颈外科1	17-06649（右耳前壁） 涎腺型上皮癌，结合免疫组化首先提示腺样囊性癌。 主要免疫组化：P63(+),CK(+),S-100(-),P53(-),Ki-67(约40%+)。 本院免疫组化结果显示:CK5&6(3+),Laminin(灶+),P40(2+),SMA(1+),CK18(3+),CD117(1+)。 特殊染色结果显示:粘卡(±)。 “右耳腺样囊性癌术后” （1）（右侧骨性外耳道前下壁）、（2）（中耳）、（3）（外耳道肿物）、（4）（右下颌骨颏突） 外耳道腺样囊性癌，累及皮肤、软骨、（右侧骨性外耳道前下壁），伴神经侵犯，未见明确脉管瘤栓。（右下颌骨颏突）、（中耳）、外耳道切缘及基底切缘未见癌。 免疫组化：AE1/AE3(3+)，CK7(3+)，CK5/6(2+)，Calponin(1+)，P63(2+)，SMA(1+)，Laminin(-)，S-100(1+)，Ki-67(+…	2017-07-05	2017-07-19 17:27:00	（1）破碎质硬组织一堆，大小3×2×0.5cm。（2）破碎质硬组织一堆，总直径0.8cm。（3）部分外耳道及周围软组织，总大小3.5×3×2.5cm，近下端局灶皮肤表面糜烂，直径0.4cm，切面其下方组织灰白色，质硬韧，界限不清，大小约1.5×1×0.5cm，似侵犯软骨，距软组织最近切缘2cm。（4）骨组织两块，总大小2.5×2×1.5cm。	右外耳道	1	外耳道	9	1	扩切不保证	1	1					1	无	x	2	皮肤	无	0	0	无	未报		有	CK5&6(3+),Laminin(灶+),P40(2+),SMA(1+),CK18(3+),CD117(1+)。	7年前右耳出现症状	2019-07-18
Re		724756		3	C	2		90	10		2	100	28	1357458	王宇鹏	1	1	头颈外科1	（B超送检穿刺-右腮腺术区） 细胞形态考虑为腺样囊性癌。 734809“右腮腺腺样囊性癌术后” （1）（右腮腺术区肿物） 增生的纤维组织及少许导管上皮组织，伴炎细胞浸润，未见明确恶性证据“右腮腺腺样囊性癌术后” （1）（右腮腺复发肿物） 腮腺腺样囊性癌。肿瘤最大径3.5cm，呈多结节状浸润涎腺周围纤维脂肪组织，局部可见围神经生长。 rpTNM分期：rpT3（请结合临床）	2017-07-10	2017-07-15 14:20:00	（1）灰褐不整形组织，大小3.5×2.5×2cm，切面呈灰黄质中结节状。	右腮腺	1	腮腺	1	1	复发肿物包绕面神经完整切除,延伸至烧灼缘	1	2					1	不确定	x	2		无	0	0	无	未报		有		2016/1/8外院术后	2019-09-20
P	形态特殊	725547		5	BS原0-0-20-80	5			50	50	3	100	71	1406082	吴金芳	2	2	头颈外科2	745982 （1）（活检-硬腭？） 涎腺源性恶性肿瘤，结合病史及形态，首先考虑为腺样囊性癌。（1）（部分右侧上颌骨） 硬腭涎腺源性恶性肿瘤，结合形态及免疫组化结果，首先考虑为腺样囊性癌。肿瘤形态不典型，浸润性生长，累及神经及上颌骨，粘膜切缘净。 免疫组化结果显示：AE1/AE3(局灶2+)，CD10(3+)，CD117(2+)，CK7(局灶2+)，SMA(-)，S-100(2+)，Ki-67(密集区域约40%+)，P63(-)。	2017-07-12	2017-09-06 10:42:00	（1）部分上颌骨、牙龈粘膜及硬腭切除标本，大小5×4×2cm，上附6颗牙齿，内侧硬腭粘膜面积5×3.5cm，粘膜中央见一隆起型肿物，大小2.7×2×1.5cm，切面灰白实性质硬界不清。肿物局灶似侵犯骨质。另见破碎骨组织一堆，大小5×3.5×1cm，未见明确肿物。其中含牙齿1颗。	硬腭	1	口腔（上腭）	5	1	R0还算局限，粘膜切缘净，累及骨质	0	1					1	不确定	x	2	上颌骨	无	0	0	无	未报		无		半年前起病，3个月前活检切除，本次算扩切更合适	2017-10-09
P		725998		6	GCSB	5	20	30	30	20	3	100	39	1405968	孙继兵	1	1	头颈外科2	（1723465）（喉部(活检3块)） 腺样囊性癌。 （2）（部分喉） 会厌根部腺样囊性癌，肿瘤最大径2.5cm，可见神经侵犯，肿瘤侵及会厌全层，累及会厌前间隙，未累及甲状软骨、横纹肌组织及（1）（右侧部分声室带）。（冰5）（右咽侧壁切缘）、（冰6）（左咽侧壁切缘）、（冰7）（会厌骨切缘）、（冰8）（右室带切缘）及（冰9）（左室带切缘）（参见725808-812）未见肿瘤。 淋巴结未见转移癌（0/4） （冰1）（左上颈淋巴结1）0/1（参见725757） （冰2）（左上颈淋巴结2）0/1（参见725758） （冰3）（右颈淋巴结1） 0/1（参见725760） （冰4）（右颈淋巴结2） 0/1（参见725761） pTNM分期：pT3N0	2017-07-13	2017-07-19 10:48:00	（1）片状不整形粘膜组织，形状不规则，未见明确粘膜样区。（2）部分喉，会厌大小6×3×1.0cm，未见明确声门区，会厌下部及右侧部分为主，左侧部分缺失，于会厌粘膜下可见灰白肿物，大小2.5×1.5×1cm，肿瘤切面灰白质细腻，侵透会厌软骨，局灶区紧邻甲状软骨骨膜。	会厌	1	喉	12	2	送检切缘阴性，累及会厌前间隙距离边缘<1mm	1	1		1	2.5		1	不确定	0	0		无	0	0	无	未报		无			2019-07-03
Re-M		729568		4	C	2	10	90			1	100	33	1410448	王倩	2	1	神外组1	（冰1）（右腮腺肿物） 腺样囊性癌。（冰1）（右腮腺肿物） 腺样囊性癌。 “右侧颅底内外沟通腺样囊性癌术后10月余复发” （冰1）（右腮腺肿物）（参见729413）、（1）（右腮腺浅叶）、（2）（颞下窝肿瘤）、（3）（牙龈肿物）、（4）（颞肌肿瘤）、（5）（颞窝肿瘤）、（6）（中颅底肿物）、（7）（颅内肿瘤） 以上送检组织内均见腺样囊性癌浸润，可见神经侵犯。	2017-07-28	2017-08-04 20:15:00	（1）破碎不整形组织一堆，总大小10×8×5cm，部分灰黄分叶状，部分灰白质稍硬。（2）破碎不整形组织一堆，总大小9×7×5cm，部分灰白质韧，部分灰黄颗粒样。（3）灰白组织一块，大小1×1×0.5cm，部分灰白，部分灰红。（4）灰红组织一块，大小5×3×2cm，另附少许灰白质韧组织，似为肌肉及韧带组织。（5）灰白组织大小4×3×2cm，切面灰白灰红质稍硬。（6）破碎组织一堆，总体积3×2×1cm，切面灰白质硬，部分似为骨组织。（7）灰白灰红组织三块，总体积3×2×1cm。	右颅底	1	鼻腔鼻窦颅底	1	1	R2全切颅外和大部颅内肿瘤，累及腮腺等部位	1	2	10月余				1	不确定	x	2	颅底，颅内，颞肌，牙龈	无	0	0	无	未报		无		2016-10外院经鼻内镜手术，未放疗	2017/11/6，预后不佳
P		731979		3	GC	5	50	50			1	100	41	1409947	刘萍	2	1	头颈外科2	（冰1）（右颌下腺及肿物） 形态符合涎腺腺样囊性癌，肿瘤大小2×1.5×1cm，累及涎腺周围纤维组织，可见多灶神经侵犯，未见明确脉管瘤栓。 周围淋巴结未见转移癌（0/2）。 （冰1）（右颌下腺及肿物）（参见731979） 形态符合涎腺腺样囊性癌，肿瘤大小2×1.5×1cm，累及涎腺周围纤维组织，可见多灶神经侵犯，未见明确脉管瘤栓。 淋巴结未见转移性癌（0/10） （冰1）（右颌下腺及肿物）周围淋巴结 0/2 （1）（右颈2区淋巴结） 0/8 pTNM:T1N0 17-09581（右侧颌下腺肿物穿刺）少许涎腺源性肿瘤，首先应除外腺样囊性癌。	2017-08-09	2017-08-15 10:39:00	（1）结节数枚，直径0.5-0.8cm。	右颌下腺	1	颌下腺	3	1	颌下腺包膜还算完整,距边缘<1mm	1	1	只看冰冻号	1	2cm		1	无	0	0		无	0	0	无	未报		无			2018-10-24
RM赵大芬-卓	25，ki75%	734215		2	S	3			100		3	100	40	1340323	赵大芬	2	1	乳门	X004530（穿刺-左胸壁）:有肿瘤细胞，结合形态及病史，可符合腺样囊性癌。“左乳腺样囊性癌术后” （1）（左胸壁肿物） 皮肤皮下组织及横纹肌组织内可见腺样囊性癌浸润，结合病史及形态，符合乳腺癌术后复发/转移。肿瘤未累及表皮，基底切缘及侧切缘均未见癌。 免疫组化结果显示：ER(-，0%)，PR(-，<1%)，HER2(-)，CD117(灶+)，CK5/6(3+)，EGFR(1+)，Ki-67(50%+)。	2017-08-17	2018-02-08 09:19:00	（1）带皮软组织一块，大小3.8×3.5×1.7cm，梭皮面积3.8×1.9cm，多切面切开，距皮肤0.2cm皮下脂肪及肌肉组织间见一肿物，大小1.4×1×0.9cm，切面灰白实性质硬界不清，呈多结节状，距基底切缘最近0.2cm，距侧切缘最近0.8cm。	左乳，左胸壁		乳腺	7	2		0	2					0	有		2		无	0	0	无	未报		有	ER(-，0%)，PR(-，<1%)，HER2(-)，CD117(灶+)，CK5/6(3+)，EGFR(1+)，Ki-67(50%+)。		2018-07-06
RR张伟0		745989		3	S	3		20	80		3	100	53	976220	张伟	1	2	头颈外科1	“右腮腺癌术后” （1）（右腮腺面神经复发肿物） 纤维及横纹肌组织内见腺样囊性癌浸润，可见神经侵犯。 （冰1）（右颌下结节）（参见745895） 纤维组织中见腺样囊性癌浸润。 （冰2）（右下颌后缘软组织切缘）（参见745899）纤维组织，未见癌。	2017-10-09	2017-10-13 08:16:00	（1）灰黄不整形组织一块，大小4×2×2cm，局部可见缝线，缝线处为一条索状组织，长0.5cm，直径0.2cm。其余组织切面灰白质硬，大部分被肿物占据。	右腮腺，有颌下腺	1	腮腺	1	1	延伸至烧灼缘	1	2					1	不确定		2		无	0	0	无	未报		无		2017-3MRI复发，术中见右腮腺区、右颌下均见肿瘤	2017-10-18
PM		754646		7	S	3	30	20	50		3	100	37	1431106	李建忠	1	1	头颈外科1	（冰1）（颧弓旁肿物）（参见754579） 、（冰2）（颧弓上肿物）（参见754614）、（3）（右外耳道及部分腮腺） 外耳道小涎腺来源的恶性肿瘤，结合形态及免疫组化染色结果，符合腺样囊性癌，以管状和筛状分化为主。肿瘤侵犯软骨、横纹肌、骨质及涎腺，累及皮下组织及真皮层，可见多灶神经侵犯。（4）（右外耳道骨性前壁）、（5）（右鼓室肿物）、（6）（颞下窝肿物）、（7）（颧弓前肿物）、（8）（面神经颧支前端肿物），上述送检组织内均可见癌浸润。肿瘤未累及（2）（髁突），皮肤切缘未见癌。 淋巴结未见转移癌（0/30）。 肿瘤旁淋巴结 0/5 （1）（右颈2区淋巴结清扫） 0/25，一枚淋巴结内可见肉芽肿结节。 免疫组化结果显示：AE1/AE3(3+)，CD117(2+)，CK7(3+)，P63(2+)，Vimentin(2+)，CK5/6(3+)，Calponin(1+)，S-100(显示肿瘤多灶…	2017-11-10	2017-11-19 19:08:00	（1）结节数枚，直径0.3-3.5cm。（2）灰白质硬组织，大小2.3×2×1cm。（3）灰黄不整形组织，大小7.5×5.5×3.5cm，中央似为外耳道，可见部分皮肤，面积2.5×1.5cm，表皮下方组织周围可见灰黄涎腺组织，大小4×3×1.5cm，切面实性分叶状质软。周围脂肪组织找到结节数枚，直径0.8-1.2cm。（4）灰白破碎组织一堆，总大小2.3×1.5×0.3cm，质硬。（5）灰白灰红组织数块，总大小1.3×1×0.2cm，全埋。（6）灰黄灰褐组织一块，大小4×3×1cm，切面呈灰褐质韧，未见明确肿物。（7）灰白组织一块，大小1×0.7×0.5cm，对剖全埋。（8）灰白灰黄组织一块，大小1×0.5×0.2cm。	右外耳道耵聍腺	1	外耳道	9	1	扩切，R1	1	1					1	不确定		0	腮腺	无	0	0	无	未报		有	AE1/AE3(3+)，CD117(2+)，CK7(3+)，P63(2+)，Vimentin(2+)，CK5/6(3+)，Calponin(1+)，S-100(显示肿瘤多灶侵犯神经)，SMA(少数散在细胞+)，Ki-67(+，密集区域约15%)。17-13673（2017-27120 右耳） 结合肿瘤形态、免疫组化及病变部位，考虑起源于耵聍腺的腺样囊性癌。 CK+，CK7+，Vim+，CD117+，P63+，P40+，CK5/6+，Calponin+，Ki-67+15%。	8年前出现症状，近3年加重，术后放疗	2019-10-24
P		755024		2	GC	5	60	40			1	100	52	1433280	范启桃	2	2	头颈外科1	（冰1）（右颌下清扫） 涎腺上皮来源恶性肿瘤，形态符合腺样囊性癌。肿瘤大小2.2×2×1.8cm，侵及涎腺组织、周围纤维脂肪组织及横纹肌组织，可见神经侵犯，未见明确脉管瘤栓。 淋巴结未见转移癌（0/6）。	2017-11-13	2017-11-17 08:20:00	（冰1）灰红组织总大小4.5×3×2cm。已被临床剖开，剖面见一肿物，大小2.2×2×1.8cm，灰白实性质硬界不清，似累及周围涎腺组织，涎腺组织大小3×2×1.5cm。另于周围脂肪组织中找见结节数枚，直径0.4-1.0cm。取部分该肿物冰冻。	右颌下	1	颌下腺	3	1	病变较局限，延伸烧灼缘	1	1		1	1.2		1	无		0		无	0	0	无	未报		无		术后放疗	2019-07-02
Re-0		761375		2	GCSB	5	20	30	30	20	3	100	38	1439129	闫红丽	2	1	头颈外科2	“左腮腺肿物外院术后” （冰1）（左腮腺浅叶及肿物）（参见761375） 腮腺腺样囊性癌，主要呈筛状型，部分为实性型。肿瘤侵犯周围脂肪及横纹肌组织，可见神经侵犯，未见明确脉管瘤栓。 （1）（左腮腺深叶） 腮腺组织，未见癌。 淋巴结未见转移癌（0/13） （2）（左颈2区淋巴结清扫） 0/9 （3）（左颈3区淋巴结清扫） 0/4 pTNM分期：pT3N0“左腮腺肿物外院术后” （冰1）（左腮腺浅叶及肿物） 腮腺腺样囊性癌，主要呈筛状型，部分为实性型。肿瘤侵犯周围脂肪及横纹肌组织，可见神经侵犯，未见明确脉管瘤栓。（左侧腮腺）： 腺样囊性癌，筛状型。（穿刺-右上颌窦肿物） X014410 有涎腺上皮来源的肿瘤细胞，考虑为腺样囊性癌。18-03557（左侧腮腺）： 腺样囊性癌，筛状型。	2017-12-06	2017-12-13 07:43:00	（1）灰黄组织一块，大小3.5×3.5×0.5cm，局灶质韧，未见明确肿物。（2）结节数枚，直径0.3-0.7cm。（3）结节数枚，直径0.3-0.7cm。	左腮腺	1	腮腺	1	2	6cm扩切，延伸烧缘	1	2					1	无		0		无	0	0	无	未报		无		2007年耳后肿物外院切除未送，2013年起自觉复发	2018-05-11
P		765133		5	G	1	90			10	2	100	57	1435197	齐万欣	1	2	头颈外科1	（3）（气管肿物） 气管腺样囊性癌，肿瘤最大径2.5cm，侵达气管外膜，粘连但未累及甲状腺组织。可见侵犯神经，未见明确脉管瘤栓。（4）（气管前壁）及（5）（气管前壁2）可见腺样囊性癌浸润。（6）（气管下壁）、（冰3）（上切缘）（参见765070）、（冰6）（前切缘2）（参见765088）、（冰7）（后切缘2）（参见765089）、（冰8）（下切缘2）（参见765090）及气管环周切缘未见癌。 （冰2）（前切缘）（参见765069） 气管壁内见癌组织浸润，形态符合腺样囊性癌，石蜡切片中癌消失。 （冰4）（下切缘）（参见765071） 气管壁外膜中见腺样囊性癌浸润。 （冰5）（后切缘）（参见765072） 气管壁内小灶异型腺体，不除外癌的可能，石蜡切片中消失。 （1）（甲状腺左叶）、（2）（喉前组织）、（冰1）（甲状腺右叶肿物）（参见765064） 结节性甲状腺肿。 甲状腺左叶旁淋巴结未见转…	2017-12-20	2017-12-28 16:03:00	（1）甲状腺左叶，大小4×3×2.5cm，被膜光滑，切面灰红，未见肿物。（2）甲状腺一块，大小2×0.8×0.4cm。（3）气管壁一段，长3.7cm，宽1.5-2.5cm，粘膜表面粗糙，面积2×1.5cm，切面粗糙区可见一肿物，大小2.5×2×1cm，灰白质细界不清，累及气管壁全层。（4）气管一段，大小4.5×0.5×0.5cm。（5）气管一段，大小3.5×0.5×0.5cm。（6）气管一段，大小2.5×0.5×0.5cm。	气管	1	气管支气管	6	1	R1	1	1		1	2.5cm		1	无		0		无	0	0	无	未报	胃癌T2N0	无	EBER(-)。	2017-11-21先行远端胃癌术，气管癌术后放疗，胃癌未行化疗	2020-01-07
Re	切	766750		1	S	3	10	20	50	20	3	100	39	1215966	肖瑞萍	2	1	头颈外科1	X015395（穿刺-超声引导-左腮腺术区结节） 有腺样囊性癌细胞。“左侧腮腺腺样囊性癌术后” （1）（左腮腺肿物）、（3）（咬肌表面肿物）、（冰1）（左腮腺瘢痕组织）（参见766652）、（冰2）（左腮腺肿物）（参见766653）、 腮腺腺样囊性癌，累及腮腺外纤维、脂肪组织。可见侵犯小神经。 （2）（左腮腺深叶组织） 萎缩的涎腺组织，未见肿瘤。 （冰3）（面神经表面肿物）（参见766663） 少许纤维组织中可见腺样囊性癌浸润，包绕但未见侵犯神经。 腮腺淋巴结未见转移癌（0/2）。 rpTNM分期：rpT3N0（请结合临床）	2017-12-27	2018-01-02 18:57:00	（1）灰褐不整形组织数块，大小3×3×2cm，局灶切面灰白质韧，大小1.5×1.5×1.2cm，界不清。（2）纤维脂肪组织，总大小2×2×0.5cm。（3）不整形组织一块，大小2.5×2×1cm，切面灰白质韧。	左腮腺	1	腮腺	1	1	复发灶手术，面神经受累，没扫颈清，延伸烧缘	1	2					1	不确定	x	2		无	0	0	无	未报		无		2014-12外院左腮腺ADCC术后，	2019-05-17
Re-M-活检应剔除		772140		1	B原10-0-30-60	3	20		60	20	3	100	48	1451317	吴福琐	2	1	妇科门诊	“外院外阴腺样囊性癌治疗后复发” （1）（右侧外阴瘢痕处肿物(1)） 分化差的癌，必要时可借阅原病理切片对比观察。18-00736（右外阴、右腹股沟） 腺样囊性癌，侵犯神经。切缘未见癌。 淋巴结未见转移癌0/9。		2018-01-23 15:22:00	（1）灰白组织1块，大小0.6×0.3×0.2cm。	外阴	2	外阴	11	1	瘢痕复发活检病例	1	2					1	不确定		0		无	0	0	无	未报		无
P		774095		10	GCSB	5	10	30	30	30	3	100	51	1449622	王心奎	1	1	头颈外科2	（1）（右鼻侧壁）、（2）（部分硬腭）、（3）（鼻中隔） 被覆鳞状上皮及假复层纤毛柱状上皮的粘膜组织内均可见腺样囊性癌浸润，并累及骨、横纹肌组织，可见侵犯神经。T18-0263（鼻咽部） 腺样囊性癌。	2018-01-24	2018-01-31 11:41:00	（1）灰白粘膜组织及灰白破碎组织，总大小5×4×1.5cm，粘膜表面尚光滑，未见明确肿物。（2）不整形灰白组织一块，大小4×2.5×1.2cm，粘膜表面见一灰白粗糙区，面积1.3×0.6cm，距侧切缘最近0.8cm，周围粘膜组织灰白僵硬。（3）软骨样组织，大小5×2.5×1cm，表面被覆粘膜组织，局灶见一灰褐粗糙区，范围2.5×1.5×0.8cm。	右鼻腔，硬腭	1	鼻腔鼻窦颅底	4	1	侵犯骨质和硬腭，R1	1	1					1	不确定		2		无	0	0	无	未报		无		术后放疗	2018-06-04
P0		775047		2	S	3	10		90		3	100	54	1451119	高祥生	1	2	头颈外科1	（冰3）（左口底肿物）（参见775047） 涎腺源性肿瘤，符合腺样囊性癌。肿瘤最大径2.5cm，侵犯横纹肌、神经束及小涎腺，伴坏死及囊性变。免疫组化：Calponin(2+)，P63(2+)，CD10(-)，CK7(3+)，CK18(1+)，S-100(-)，CK5/6(3+)。 特殊染色：AB/PAS(+/-)。 （冰7）（舌腹切缘）、（冰8）（右侧口底切缘）、（冰9）（牙龈后切缘）、（冰10）（下切缘2）（参见775077-775079、775090） 上述送检组织均未见癌。 （冰4）（牙龈切缘）（参见775048）、（冰5）（下切缘）（参见775049） 粘膜组织内见癌浸润。 （冰6）（牙龈切缘2）（参见775076） 粘膜下见挤压的核深染异型细胞团浸润，考虑为癌。 （4）（部分下颌骨） 少许骨组织，未见肿瘤累及。 淋巴结转移性癌（1/18），累及淋巴结被膜外纤维脂肪及神经组织： …	2018-01-29	2018-02-05 10:17:00	（1）结节样物数枚，直径0.3-0.5cm。（2）结节样物数枚，直径0.3-0.8cm。（3）结节样物数枚，直径0.3-0.4cm。（4）破碎骨组织一堆，总大小3×3×0.5cm，取光。	左口底，	1	舌下腺	2	1	有R1,LNM	1	1	只看冰冻号				1	不确定		1		无	0	0	无	未报		有	Calponin(2+)，P63(2+)，CD10(-)，CK7(3+)，CK18(1+)，S-100(-)，CK5/6(3+)。 特殊染色：AB/PAS(+/-)。		2018-03-19
Re		782143		12	S	3	20		80		3	100	48	1459520	徐洪波	1	1	神外组1	（1）（左侧颅眶沟通肿瘤） 腺样囊性癌，累及周围纤维组织、横纹肌、骨组织及神经。	2018-03-05	2018-03-08 19:32:00	（1）破碎灰黄红褐色肿瘤组织一堆，总大小8×8×3cm，其中部分可辨认为骨组织，肿物切面灰白粗颗粒状，部分区域似累及骨。	左侧颅眶沟通	1	泪腺/颅眶沟通	19	1	R2,放疗科认为R1	1	1					1	不确定		2		无	0	0	无	未报		无		2017-10-12外院手术R2	2018/5/11疼痛，预后差截瘫可能电话妻13997111836和13909785176
P		783854		5	GS原20-10-20-50	5	30	20	30	20	3	100	44	1459904	王永苏	1	1	胸外科3	（5）（左肺上叶） 左肺上叶腺样囊性癌，可见神经侵犯，未见明确脉管瘤栓。肿瘤最大径4.2cm，主要位于叶段支气管，侵犯局灶肺组织及（7）（左肺上叶袖切的支气管壁组织），未累及脏层胸膜。（冰2）（下切缘）（参见783801）可见癌组织浸润，（冰1）（左肺上叶支气管切缘）（参见783755）、（冰3）（上切缘）（参见783802）、（冰4）（下切缘2）（参见783820）均未见癌。周围肺组织呈慢性炎，局灶伴支气管上皮化生。 淋巴结未见转移癌（0/24） 肺外淋巴结 0/3 肺内淋巴结 0/2 （1）（11区淋巴结） 0/7 （2）（4L区淋巴结） 0/4 （3）（左主支气管旁淋巴结）0/1 （4）（下肺韧带旁淋巴结） 0/3 （6）（7区淋巴结） 0/4 pTNM：pT2bN0 782181	2018-03-12	2018-03-20 09:54:00	（1）炭黑结节数枚，直径0.6-1.5cm。（2）炭黑结节数枚，直径0.8-1.2cm。（3）炭黑结节1枚，直径0.8cm。（4）炭黑结节数枚，直径0.5-0.8cm。（5）肺叶组织大小17×11×4cm，脏层胸膜表面光滑，沿支气管剖开肺，距支气管断端0.5cm处见一肿物，大小4.2×3×2.5cm，肿物切面灰白质硬界欠清，累及叶段支气管，未累及脏层胸膜，多切面切开周围肺，周围肺灰红质软。肺内外找到炭黑结节数枚，直径0.5-1.5cm。（6）炭黑结节数枚，直径0.8-1.5cm。（7）支气管壁组织，总大小1.5×1×1cm。主支气管长0.6cm，直径1.2cm，	支气管	2	气管支气管	6	1	R0	0	1		1cm	4.2cm		1	无		0		无	0	0	无	未报		无		建议术后放疗？	2019-10-15
P		784392		3	B原0-20-10-70	4	10	20	0	70	2	100	21	1461634	王泽尧	1	1	头颈外科1	（冰1）（左颌下腺及肿物） 涎腺上皮来源的肿瘤，间质明显粘液变性，局部细胞丰富，结合冰余组织切片，肿瘤主要呈条索及腺样结构，少量筛状，并显示小灶神经侵犯，符合腺样囊性癌；肿瘤最大径2.5cm，界限清楚，局灶凸向涎腺组织内生长。周围涎腺未见明显异常。 免疫组化结果显示：Ki-67(活跃区40%+)，Calponin、P63(肌上皮+)，S-100(肿瘤细胞和神经3+)，CK19(3+)，CK5/6(3+，主要为肌上皮细胞)，Vimentin(3+)，CD34(-)。 pTNM分期：pT2（请结合临床） 注：本例经科内早读会诊，同意该诊断。	2018-03-14	2018-03-26 11:40:00	（冰1）灰红不整形组织一块，大小4×3.5×2cm，沿最大面剖开，剖面见一肿物，大小2.5×2×1.5cm，切面灰白灰黄实性质韧，界尚清，取部分肿物冰冻。周围腺体灰白质软。	左颌下腺	1	颌下腺	3	1	2.5cm，距边缘<1mm	1	1					1	不确定		2		无	0	0	无	未报		有	Ki-67(活跃区40%+)，Calponin、P63(肌上皮+)，S-100(肿瘤细胞和神经3+)，CK19(3+)，CK5/6(3+，主要为肌上皮细胞)，Vimentin(3+)，CD34(-)。	发现肿物8年，术后放疗49Gy，病理疑难早读，信任弱	2019/10/29无检查结果
P		785096		5	SC	5	20	40	40		3	100	39	1461248	郭建军	1	1	头颈外科2	（冰2）（右腮腺及肿物） 腮腺腺样囊性癌。肿瘤大小4.5×4.2×2cm，累及腮腺外纤维脂肪及横纹肌组织。可见多发神经侵犯。 腮腺旁另见淋巴结一枚，未见转移癌（0/1）。 （详见785147）X021104（穿刺-右腮腺肿物） 涎腺上皮来源的肿瘤细胞，首先考虑为腺样囊性癌。	2018-03-15	2018-03-21 10:19:00	（冰2）灰红组织，大小7×4×2.5cm，多切面切开，切面见一肿物，大小4.5×4.2×2cm，肿物切面灰白实性质硬界欠清，取部分肿物冰冻。其余组织灰黄分叶状。	右腮腺	1	腮腺	1	2	4cm，距边缘<1mm	1	1	只看冰冻号				1	不确定		0		无	0	0	无	未报		无		术后放疗	2020-01-08
P		787297		9	BC	5		50		50	2	100	26	1463224	张瑶瑶	2	1	胸外科4	（7）（右肺中下叶袖状切除标本） 右肺中间段支气管根部腺样囊性癌，累及右主支气管、中及下叶叶段支气管和右肺下叶肺实质，未累及脏层胸膜，侵及肺门大血管壁。肿瘤大小3.5×3.5×3cm，可见多灶神经侵犯，未见明确脉管瘤栓。（冰3）（上叶支气管切缘）（参见787256）及（冰4）（主气管切缘）（参见787257）均可见肿瘤累及。中叶及下叶周围肺组织未见明显异常。 （冰2）（叶间肿物）（参见787180） 形态符合腺样囊性癌。 （6）（上叶支气管旁肿物） 纤维组织内见单个异型腺体，并可见粘液，伴重度灼烧退变，形态不除外腺样囊性癌浸润；另见淋巴结一枚，未见转移癌。 淋巴结转移性癌（3/33） （冰1）（7区淋巴结） 0/3，淋巴结间纤维组织内可见腺样囊性癌浸润 （参见787161） （1）（7区淋巴结） 0/3，淋巴结周围脂肪组织内见腺样囊性癌浸润 （2）（上叶支气管旁淋巴结）0/6 （3）（1…	2018-03-23	2018-03-29 15:32:00	（1）结节两枚，直径0.5-1.5cm。（2）结节数枚，直径0.3-1cm。（3）结节一枚，直径0.3cm。（4）结节数枚，直径0.5-1cm。（5）结节数枚，直径0.5-1cm。（6）结节一枚，直径0.5cm。（7）中叶肺大小11×8×5cm，下叶肺9×7×7cm，叶间裂发育尚可，上叶支气管长0.5cm，主支气管长0.5cm，中间段支气管长1.5cm，距主支气管断端1cm，中间段支气管及下叶叶段支气管内见一肿物，大小3.5×3.5×3cm，肿物堵塞下叶支气管，累及部分中叶叶段支气管，并侵及中下叶肺实质，局灶紧邻下叶肺膜。多切面切开周围肺，周围肺灰红质软，中叶肺局灶肺膜下见一炭黑结节，直径0.5cm。	中间段支气管	2	气管支气管	6	1	有R1,LNM	1	1					1	无		1		无	0	0	无	未报		无		术后放疗	2020-01-08
RR陈常梅-疑为活检	组织少，活检性质？建议排除？	789704		1	C	2		100			2	100	39	1018849	陈常梅	2	1	神外组1	“右侧泪腺腺样囊性癌术后、子宫肌瘤术后” （1）（蝶窦肿物）、（冰1）（蝶窦肿物）（参见789630） 结合病史及形态，符合腺样囊性癌。 （冰2）（上颌窦下壁组织）（参见789652） 鳞状上皮黏膜，未见癌。	2018-04-02	2018-04-09 14:55:00	（1）灰白灰褐碎组织一堆，总大小2×2×0.8cm，质韧。	有泪腺，蝶窦		泪腺/颅眶沟通	19	1		1	2	2次复发				0	不确定		2		无	0	0	无	未报		无		2018-2-24核磁复发	2019-09-16
以下是2014前的弃病例
380651	952128	耿美花活检弃	2	64	2	头颈外科1	（1）（右上颌窦肿物）冰、（2）（右上颌窦肿物） 腺样囊性癌。	2010-10-22 10:52:00	(2)灰白破碎组织一小堆,总直径0.8cm.质中.全埋	右上颌窦	1	鼻腔鼻窦颅底	4	2		1						不确定	不确定	未清扫淋巴结		无	0	0	无	未报		无
446353	1077575	莫湘军肺转移弃	1	44	1		（5）（部分喉） 喉声门上型腺样囊性癌。肿瘤位于会厌喉面，侵透会厌软骨达会厌前间隙，并累及舌根横纹肌组织，未累及甲状软骨及（3）（舌骨）；累及双侧室带，未累及双侧杓会皱襞。可见神经侵犯。（13）（左喉上神经）可见癌组织浸润。（4）（舌根肌肉切缘）冰1、（9）（右声门上深部组织）冰5 冰冻切片未见明确癌组织，石蜡切片中可见小灶癌组织浸润，提示癌组织临近舌根肌肉切缘、右声门上深部组织。（6）（左喉上神经上切缘）冰2 冰冻切片中神经纤维周围可见癌组织浸润，石蜡切片中癌组织消失。（7）（左声门旁间隙切缘）冰3、（8）（左披裂）冰4、、（10）（右室带末端切缘）冰6、（11）（右喉室）冰7、（12）（左声带上缘）冰8、（14）（喉上神经起始处）冰9、（16）（左声带下组织）冰10均未见癌。（12）（左声带上缘）冰8 鳞状上皮轻度不典型增生。 （15）（咽旁肿物） 纤维、脂肪及横纹肌组织，未见癌。 …	2013-01-09 09:34:00	（1）脂肪一块，找到结节数枚，直径0.4-1.2cm。（2）结节数枚，直径0.05-0.8cm。（3）不整形组织一块，大小2×1.2×1.2cm，部分为骨组织，部分为表面软组织。（5）水平部分喉，大小5.5×4×3cm，可见部分甲状软骨，于会厌喉面可见一灰白隆起肿物，大小3.2×3.2×3cm，切面灰白质地细腻，侵透会厌达会厌前间隙，并累及舌根，未累及甲状软骨，会厌舌面可见多个灰白隆起，直径0.3-0.7cm，表面尚光滑，肿物距下切缘最近0.4cm，未累及双侧杓会皱襞，可见左侧杓状软骨，似见左侧室带、右侧室带，未见明确声带和右侧杓状软骨。（13）灰白不整形组织一块，大小1.5×1×0.5cm。（15）灰白灰黑不整形组织一块，大小1.2×0.8×0.4cm。	会厌	1	喉	12	1		1						有	不确定	有	双室带，舌根	无	0	0	无	未报		无
[truncated: 14 more columns]

## Sheet: 90例原发和复发
大类	核分裂/2mm=13HPF/2	病理号（705213之后在麦迪库）	备注	筛选蜡块号	组织分型(优势型50%以上，混合型两种达到30%，混合29例，B为主8例,C为主18例，G为主16例，S为主29例)	TYPE(1G2C3S4B5M)	G-管状	C-筛状	S-实性	B-基底样	分级新加-30%S	sum	本次手术年龄	病案号（1057077及以前不全）	姓名	性别：男1女2	年龄分组	申请科室	诊断结论	手术日期	诊断时间	大体描述	部位	部位大组（1头颈2非）	部位分组	部位分号	手术1/活检2/细胞学3	切缘阳性	R0切除（是0否1）	原发1/复发2/转移3	复发时限	病灶个数	肿瘤最大径	T分期	神经侵犯（0未见1可见包括炎症包围神经）	脉管瘤栓	N分期	淋巴结转移（0无1有2未扫）	累及临近器官	有无远处转移	转移部位	转移序号	有无放/化疗史	治疗后反应	第二原发癌	免疫组化	项目	备注	末次随访
Re-0		498757		2	S	3		20	50	30	3	100	50	1160797	李建立	1	1		“左上颚、上颌骨腺样囊性癌二次术后” （右中颅底肿瘤） 结合病史及形态，符合腺样囊性癌（实体型），可见脉管瘤栓。 免疫组化:P63(1+),CK5/6(2+),CK34bE12(2+)。 特殊染色:粘卡(+),AB/PAS(+)。 注：必要时可借原病理切片对比观察。	2014-04-14	2014-04-24 08:43:00	破碎灰黄质韧组织，总大小5×4×3cm。	右上腭，上颌骨，右中颅底	1	口腔（上腭）应为右中颅底	5	1		1	2	2011-6右上腭部手术，2013-1复发手术颌下腺淋巴结转移，2014-2头痛，3-20外院CT复发7cm			4b-再核实原发部位	0	有	x	2		无	0	0	无	未报		有	P63(1+),CK5/6(2+),CK34bE12(2+)。		2014-04-29
Re		500317		4	G	1	60	30	10		2	100	37	1163046	齐君龙	1	1		“腺样囊性癌术后” （右鼻腔-前颅底沟通肿物） 腺样囊性癌。	2014-04-24	2014-04-29 10:57:00	灰黄组织一堆总大小4×4×1.5cm。	右鼻腔-前颅底沟通	1	鼻腔鼻窦颅底	4	1		1	2	可算			4b	0	不确定	x	2		无	0	0	无	未报		无		2005年外院右鼻腔手术及扩大手术后放化疗，2013-6起症状重现，	2019/1/10，电话？
P		503592		4	GC	5	60	40			1	100	51	1166825	王柱良	1	2	头颈外科1	(2)（部分舌） 横纹肌组织中可见腺样囊性癌浸润，侧切缘及基底切缘未见癌。	2014-05-16	2014-05-21 20:19:00	（2）部分舌切除标本，大小4×2×2cm，上附缝线，切面灰褐未见明显异常。另见小块灰褐组织，大小1.3×0.6×0.5cm，书页状切开，可见灰黄质硬区，大小1.0×0.5×0.5cm，全取材。	舌肌内	1	舌	10	1	R1，镜下延伸烧灼处	1	1				需核实切片肿瘤大小	1	不确定	x	2		无	0	0	无	未报		无		发现舌肿物5月就诊，术后未治疗随诊	2019-09-03
P		504458		4	B	4	10			90	2	100	58	1167157	高翠萍	2	2		（1）（舌肿物）冰、（2）（部分舌） 舌腺样囊性癌，可见神经侵犯，肿瘤大小4×3.5×2.5cm，侵及舌肌，未累及舌粘膜，舌切缘未见癌。 （3）（右颌下清扫） 淋巴结未见转移癌（0/7）。 pTNM分期：pT2N0	2014-05-23	2014-05-29 14:14:00	（2）部分舌切除标本2块，大者大小6.5×4×0.5-2.5cm，局部见一缺损区（冰冻），大小4.5×2×2cm，未见明确肿物残存。小者大小2.5×1.5×1cm，（3）颌下腺大小4×3.5×1.5cm，被膜光滑，切面灰黄分叶状，周围脂肪大小4×2.5×1.5cm，找到结节数枚，直径0.5-1.0cm。	舌	1	舌	10	1	R1，镜下延伸烧灼处	1	1				需核实切片深度	1	不确定	0	0		无	0	0	无	未报		无		术后未治疗	2019/9/4电话13810439680子
P		516975		7	S	3	10		90		3	100	27	1183703	相立芳	2	1		（1）（左侧眶内肿瘤）冰1、（2）（颅眶沟通肿瘤） 腺样囊性癌，可见多处神经侵犯。肿瘤累及周围纤维脂肪及横纹肌组织，并侵犯骨质。 免疫组化结果显示:AE1/AE3(3+),CK18(3+),CK7(3+),CK34βE12(3+),CK5/6(2+),CD56(1+),S100(1+),Bcl2(3+),Syno(-),ChrA（-),P63(-),Calponin(-),SMA(-),Ki67(+60%)。 说明：此例已充分取材，未见角化区域。	2014-08-13	2014-08-20 09:46:00	（2）灰白灰褐破碎不整形组织一堆，大小4.5×3.5×1.5cm，切面灰白质糟脆，其中见部分破碎骨质，大小1.5×1.0×1.0cm，可疑肿瘤侵犯。	左侧眶内，颅眶沟通）	1	泪腺/颅眶沟通	19	1	缓解神经压迫，未摘除眼球	1	1	ki-67达60%			根据影像和术中核实分期	1	不确定	x	2	骨	无	0	0	无	未报		有	AE1/AE3(3+),CK18(3+),CK7(3+),CK34βE12(3+),CK5/6(2+),CD56(1+),S100(1+),Bcl2(3+),Syno(-),ChrA（-),P63(-),Calponin(-),SMA(-),Ki67(+60%)	左额疼痛4月，左眼球突出1.5月就诊，核磁6-24显示左颅眶沟通病变累及骨质和海绵窦，术后放疗	2015/6/4电话13676389396和13969553228
P0		518891		7	B	4	15	5		80	2	100	73	1186185	杨先秀	2	2		（3）（口底肿瘤） 口底腺样囊性癌，可见脉管瘤栓，未见肯定神经侵犯；肿瘤累及口底粘膜及小涎腺，未累及横纹肌；距离基底<2mm。 淋巴结转移性癌 （1/18） （1）（左颈1区淋巴结） 0/8，另见涎腺组织； （2）（左颈2区淋巴结） 1/10	2014-08-25	2014-08-28 13:59:00	（1）脂肪及涎腺，涎腺大小4.0×3.0×2.0cm，切面灰黄分叶状，未见异常。脂肪内找到淋巴结数枚，直径0.3-0.6cm。（2）结节数枚，直径0.3-0.8cm。（3）灰红不整形组织，局部附粘膜，面积4.5×1.0cm，组织大小5.5×4.5×3.5cm；切面见一灰白灰黄界清结节，有包膜，大小3.5×3.5×2.0cm，切面灰黄有坏死性囊腔形成，直径0.2-0.6cm。周围少量脂肪及肌肉，脂肪内找到结节数枚，直径0.5-1.2cm。	口底	1	舌下腺	2	1	根治术，R1（基底<2mm）,淋巴结转移1/18	1	1				切片看分期和LNM	1	有	1	1		无	0	0	无	未报		无			2014-09-22
P0		524519		7	C	2		80	20		2	100	49	1194168	梁作军	1	1	头颈外科1	（13）（左侧部分上颌骨及左面部皮下肿物）、 腺样囊性癌，肿瘤大小4×4.5×2cm，浸润横纹肌、上颌骨及皮下组织，可见神经浸润，未累及皮肤；（5）（颞下窝）及（14）（鼻中隔深面组织）局灶纤维组织内可见癌浸润。 （6）（牙龈）冰 （病理号524412） 鳞状上皮粘膜组织及横纹肌组织，石蜡制片中组织周边见小灶异型上皮细胞团伴钙化，考虑为癌。 （8）（鼻中隔切缘）冰 （病理号524415） 纤维组织中见腺样囊性癌浸润。 （1）（筛窦）、（2）（中鼻甲）、（3）（眶组织）冰、（4）（颞下窝）冰、（7）（颊粘膜）冰、（9）（外侧皮下组织）冰、（10）（内侧皮下组织）冰、（11）（上策皮下组织）冰、（12）（下侧皮下组织）冰及（15）（鼻中隔切缘2）均未见癌。 （病理号524404、411、413、424、426、428、430、476） 上述送检组织内均未见癌累及。	2014-09-29	2014-10-09 18:27:00	（1）灰白破碎组织一堆，总大小1×1×0.3cm，质软。（2）灰红色不整形组织一块，大小3×2×0.5cm，多切面切开切面灰褐局灶质硬含骨组织。（5）灰白破碎不整形组织一堆，总大小2×1×0.6cm，质中偏韧。（13）不整形骨组织及周围软组织，总大小7×4×3.5cm，一侧面附皮肤，面积3×2cm，皮肤表面未见特殊，另一侧面见质软肿物，大小4×4.5×2cm，肿物切面灰白质软，累及骨组织及周围软组织，未侵及皮肤。（14）灰褐破碎不整形组织一堆，大小1.5×1.5×0.4cm。	上颌窦	1	鼻腔鼻窦颅底	4	1	根治术，上颌窦前壁至皮下组织，鼻中隔、牙龈，颞下窝有癌	1	1				4a	1	不确定	x	2	面部	无	0	0	无	未报		无		术后放疗	2015-02-13
R张伟		525012		1	GC	5	40	50	10		2	100	50	976220	张伟	1	1		“腮腺腺样囊性癌外院术后3年余” （2）（右腮腺深叶及肿物）冰及冰余 腮腺腺样囊性癌，大小2.5×2×2cm，可见神经侵犯。 （1）（右腮腺浅叶）未见癌累及。 淋巴结未见转移癌（0/16） （1）（右腮腺浅叶）周围淋巴结 0/1 （3）（右上颈清扫）淋巴结 0/15 rpTNM:rpT2	2014-10-09	2014-10-13 09:06:00	（1）灰黄不整形组织大小4×3.2×1cm。（3）结节数枚，直径0.2-0.8cm。	右腮腺	1	腮腺	1	1	R1，镜下延伸烧灼处	1	2	第一次术后3年余			2	1	不确定	0	0		无	0	0	无	未报		无		2011年4月外院腮腺ADCC切除，口角歪斜，未放疗，2014-5复发，9-23明显复发，手术及颈清扫（阴性）	2017-09-19
P0		526015		4	S	3	10		70	20	3	100	38	1195013	陈军	1	1	胸外科4	（8）（左肺上叶袖状切除标本）、（9）（左肺下叶） 左肺上叶腺样囊性癌。肿瘤主要位于上叶叶支气管腔内，侵透支气管壁达管壁周围纤维脂肪组织，累及主支气管及上叶肺段支气管，未累及下叶支气管及肺实质，（6）（下叶支气管切缘）冰、（7）（左主支气管切缘）冰及未见癌，上叶周围肺可见阻塞性肺炎及粘液栓形成，下叶周围肺未见明显病变。 淋巴结未见转移性癌（0/20） 上叶肺外淋巴结 0/1 上叶肺内淋巴结 0/1 下叶肺外淋巴结 0/2 下叶肺内淋巴结 0/1 （1）（肺门淋巴结） 0/2 （2）（5区及6区淋巴结） 0/2 （3）（下肺静脉旁淋巴结） 0/3 （4）（隆突下淋巴结） 0/3 （5）（下叶支气管旁淋巴结）0/5 免疫组化结果显示:CK7(2+),CD117(2+),TTF1(-),P63(-)。 pTNM分期：pT2aN0（请结合临床）	2014-10-14	2014-10-22 09:07:00	（8）左肺上叶袖状切除标本，大小14×10×8cm，主支气管长1.5cm，宽2cm，沿支气管剖开肺，于左肺上叶叶支气管内可见一肿物，大小3×1×1cm，灰白、质硬、界不清，累及主支气管，距主支气管切缘1.0cm，肺内外找到结节数枚，直径0.5-1cm，周围肺灰黄、质软，部分可见粘液栓。（9)左肺下叶切除标本，大小17×11×8cm，沿支气管剖开肺，未找到明确肿物及质硬区，支气管处可见缝线，肺内外找到结节数枚，直径0.3-0.5cm，周围肺灰红、质软。(1)炭黑结节2枚，直径0.5及1cm。(2)炭黑结节2枚，直径0.8及2cm。(3)炭黑结节1枚，直径1cm。(4)炭黑结节数枚，直径0.5-1cm。(5)炭黑结节数枚枚，直径0.4-0.8cm。	上叶支气管	2	气管支气管	6	1	R0	0	1	LN阴性			2a	1	不确定	0	0		无	0	0	无	未报		有			2014-11-20
Re-0		526900		5	S	3			100		3	100	46	1199338	高桂玲	2	1	头颈外科1	“左颌下腺癌外院术后1年余” (1)（咽旁肿物）冰、（4）（左咽旁肿物） 涎腺来源分化差的癌，伴大量神经侵犯，考虑为实体型腺样囊性癌，建议借阅原手术切片进一步对比。 淋巴结转移癌（3/7）。 （2）（左颈2区淋巴结）2/3 （3）（左颈2区淋巴结）1/4 pTNM分期：ypTxN2 （参考病理号：526858）	2014-10-20	2014-10-23 16:42:00	（2）结节数枚，直径0.2-0.8cm。（3）结节数枚，直径0.2-大小1.5×1×0.2cm。（4）灰黄质韧不整形组织一块，大小2×1.5×1cm，切面灰黄质韧结节状。	左颌下腺	1	颌下腺	3	1	R1，镜下延伸烧灼处	1	2	1年余			3	1	不确定	2-lnm切片核实	1		无	0	0	无	未报		无		2013-6外院左颌下腺术后为低分化腺癌，本次手术有LNM	2014-12-10
Re		531053		2	GC	5	40	40		20	2	100	63	552694	杨素文	2	2		“颌下腺癌术后20余年” （1）（口底复发肿物） 纤维脂肪组织中见大量腺样囊性癌浸润，侵犯血管壁、神经及周围横纹肌组织，并侵犯周围淋巴结（1/1）。 （2）（舌下神经） 神经及神经周围纤维结缔组织均见癌浸润。 （3）（舌下神经近端） 神经周围纤维结缔组织见癌浸润。	2014-11-17	2014-11-23 08:33:00	（1）不整形灰白灰黄组织一堆，大小4.5×4×2.5cm，切面部分区灰白质硬。（2）灰白组织，大小1.5×0.3×0.2cm。（3）灰白组织一粒，直径0.3cm。	颌下腺	1	颌下腺	3	1	有	1	2	20余年			3-核实面神经是否受累	1	血管壁侵犯	0	0		无	0	0	无	未报		无		1993-5-17外院左颌下腺adcc切除，7-2我院左颈及颌下LN清扫（0/16），后续放疗	2017-11-18
P		533747		4	C	2	20	80			1	100	33	1208248	张驰	1	1	胸外科1	（6）（右肺中下叶） 支气管腺样囊性癌，肿瘤主要位于右肺中间段支气管壁，累及下叶及中叶支气管开口处，可见脉管瘤栓及神经侵犯。肿瘤未累及中叶及下叶脏层胸膜，中叶及下叶周围肺组织局灶呈阻塞性肺气肿改变。（4）（支气管切缘）冰可见癌浸润，（8）（支气管切缘2）冰未见癌。 淋巴结转移性癌（3/20） 下叶肺外淋巴结 1/1 下叶肺内淋巴结 1/7 中叶肺外淋巴结 0/1 中叶肺内淋巴结 0/2 （1）（8区淋巴结） 0/1 （2）（7区淋巴结） 1/3 （3）（中间段支气管旁淋巴结）0/2 （5）（肺门淋巴结） 0/1 （7）（右上纵隔淋巴结） 0/2 （参见533572、533580）	2014-12-01	2014-12-05 16:15:00	（6）右肺中下叶；中叶大小10.5×5.3×2.8cm，下叶大小14×8.5×5cm，中间段支气管腔内管壁粗糙，粗糙区范围2.6×1.3×0.5cm，累及中间段支气管及下叶支气管开口处，似未累及中叶叶段支气管，中、下叶周围肺灰红质软，局灶灰红海绵样。中叶肺内、外找到淋巴结数枚，直径0.5-0.6cm，下叶肺内、外找到炭黑结节数枚，直径0.3-1cm。（1）炭黑结节1枚，直径0.4cm。（2）炭黑组织一块，直径1.5cm。（3）炭黑结节1枚，大小1.2×0.5×0.3cm。（5）炭黑结节2枚，直径0.3-0.5cm。（7）炭黑结节2枚，直径0.6-1.1cm。	支气管	2	气管支气管	6	1	R0	0	1				1c	1	有	2	1		无	0	0	无	未报		无		局切后扩切，有LNM，2015-1-5开始化疗4周期	2019-07-24
P		534878		1	BC原0-30-20-50	5	10	40	20	30	2	100	39	1205573	王海霞	2	1	胸外科4	（3）（气管肿瘤+舌骨） 气管腺样囊性癌，侵达气管外膜，未累及舌骨。未见脉管瘤栓及侵犯神经。癌组织距环周切缘（基底切缘）<0.1cm，（1）（气管下切缘）冰（病理号：534788）及（2）（气管上切缘）冰（病理号：534789）均未见癌。	2014-12-08	2014-12-11 11:35:00	气管一段，长4cm，直径2.5cm，气管腔面局灶灰黄隆起，范围3×2.3×1.5cm，切面灰黄质硬细颗粒状。另见完整舌骨。	气管	2	气管支气管	6	1	基底<1mm	1	1				3	1	无	x	2		无	0	0	无	未报		无			2018-04-17
P		535433		4	C	2	20	80			1	100	50	1208614	尉青霞	2	1		“外阴肿物外院活检术后” （4）（外阴及肿物） 腺样囊性癌。肿瘤大小2.5×1.5×1.5cm，浸润皮肤真皮、皮下纤维脂肪及周围横纹肌组织，可见神经浸润，未累及表皮，局灶表皮基底细胞伴有增生，皮肤切缘及另送（5）（外阴肿物基底切缘）均未见癌累及。 淋巴结未见转移性癌（0/21） （1）（右腹股沟淋巴结） 0/16 （2）（左腹股沟淋巴结1）冰 0/1 （3）（左腹股沟淋巴结2） 0/4	2014-12-10	2014-12-16 14:20:00	（4）灰红不整形组织，结构不清，总大小7×3.5×2cm，皮肤面积5×2cm，皮肤表面灰褐色尚光，多切面切开局部灰白质稍硬，质硬区范围2.5×1.5×1.5cm，界不清。（1）触及结节数枚，直径0.3-0.8cm。（3）结节数枚，直径0.3-0.8cm。（5）灰褐组织1粒，直径0.3cm。	外阴	2	外阴	11	1	R1，镜下延伸烧灼处	1	1				1b	1	不确定	0	0		无	0	0	无	未报	2006年右手背高分化鳞癌外院术后	无		2009年起外阴肿物，逐渐长大，5cm外院局切后扩切，位于偏右侧	2017/12/18，电话查
P		536083		2	S	3		20	50	30	3	100	55	1207718	姬秀敏	2	2	胸外科4	（3）（右肺上叶） 肺腺样囊性癌，肿瘤累及段支气管，未累及脏层胸膜。未见脉管瘤栓及侵犯神经。周围肺局部呈阻塞性机化性肺炎。（4）（支气管切缘）冰未见癌。 淋巴结未见转移性癌（0/19） 肺外淋巴结 0/3 肺内淋巴结 0/3，肿瘤临近但未明显累及1枚肺内淋巴结 （1）（叶间淋巴结（11区）） 0/2 （2）（上叶支气管旁淋巴结） 0/1 （5）（3区淋巴结） 0/4 （6）（隆突下淋巴结（7区）） 0/6 （见病理号：535996） pTNM分期：pT1bN0	2014-12-15	2014-12-18 18:54:00	（3）肺叶切除标本，大小13×8×5cm，肺膜完整尚光，沿支气管剖开，于段支气管管腔见肿物，大小2.5×2×1cm，累及段支气管及肺，距支气管切缘0.5cm，未累及脏层胸膜，周围肺支气管内见粘液栓，局部海绵样。肺内、外找到淋巴结数枚，直径0.8-1cm。（1）炭黑结节一枚，直径0.8cm。（2）炭黑结节一枚，直径0.8cm。（5）炭黑结节数枚，直径0.3-0.6cm。（6）炭黑结节数枚，直径0.5cm-大小2×1.5×0.4cm。	段支气管	2	气管支气管	6	1	R0	0	1				1c	0	无	0	0		无	0	0	无	未报		无			2019/9/4建议放疗
P		539308		1	S	3	10	15	70	5	3	100	42	1214121	顾海侨	2	1	胸外科3	（5）（右全肺及部分气管下段左主支气管隆突及奇静脉弓）（参见539253、539254） 腺样囊性癌，局部分化较差，伴坏死，可见神经侵犯，未见明确脉管瘤栓。肿瘤广泛累及气管、左主支气管、隆突、右主支气管、肺叶、段支气管、奇静脉弓、肺组织及脏层胸膜。上叶局部见肉芽肿性病变，考虑为结核，请待抗酸染色结果。上叶周围肺呈肺水肿改变，下叶周围肺呈轻度肺气肿，局灶伴肺水肿。（7）（上切缘）冰 气管壁组织中见肿瘤浸润。（8）（下切缘）冰 冰冻切片中左主支气管壁组织未见癌，石蜡连续切片后，可见小灶癌浸润，考虑肿瘤紧邻切缘。 淋巴结转移性癌（5/33） 上叶肺外淋巴结 0/3 上叶肺内淋巴结 2/2 下叶肺内淋巴结 1/3 肺门淋巴结 1/1 （1）（7区淋巴结） 0/4 （2）（4R淋巴结） 0/6 （3）（2R淋巴结） 1/9 （4）（3P淋巴结） 0/3 （6）（5区淋巴结） 0/1 （9）（8区淋…	2015-01-04	2015-01-09 10:29:00	（5）右全肺切除标本，下叶大小14×10×6cm，上叶大小13×7×7cm，未见中叶，叶间裂发育良好，上叶局部肺膜略灰白，范围1.5×2cm，主支气管直径3cm，中间段支气管直径1.5cm，距主支气管切缘1cm处，肺门根部见一肿物，大小4×3×4cm，肿物累及右主支气管及中间段支气管及上下叶叶段支气管及奇静脉弓，累及上下叶及叶间裂，未累及脏层胸膜，肺内外找到结节数枚，直径0.3-1.5cm，上叶局灶可见一质硬区，大小0.8×0.5×0.4cm，紧邻脏层胸膜，上下叶周围肺灰红质软。（1）炭黑结节数枚，直径0.4-1cm。（2）炭黑结节数枚，直径0.5-1.5cm。（3）炭黑结节数枚，直径0.6-1.3cm。（4）炭黑结节数枚，直径0.3-1cm。（6）炭黑结节一枚，直径1cm。（9）炭黑结节一枚，直径1cm。	右肺门	2	气管支气管	6	1	R1	1	1				2b	1	无	2	1		无	0	0	无	未报	2016-1-12胃壁间质瘤后切除	无		侵犯肺膜LNM,放疗3-12中出现多量心包积液，细胞学报可见非典型细胞，但病例写有腺癌细胞？加心包内注射白介素	2019-10-21
P		542114		5	S	3	10		90		3	100	64	1217618	赵萍	2	2	胸外科1	（5）（气管肿物） 气管粘膜下腺体来源的恶性肿瘤，结合形态及免疫组化结果考虑为腺样囊性癌，主要呈实性型结构。肿瘤侵犯气管全层，可见神经侵犯。（4）（支气管下切缘）冰局灶粘膜上皮内见少许肿瘤细胞浸润。（3）（切缘）冰可见肿瘤浸润。 淋巴结转移性癌（2/5） （1）（2R区淋巴结） 2/4 （2）（4R区淋巴结） 0/1 （参见542036、542080） 免疫组化结果显示:CK7(3+),Vimentin(1+),CD117(2+)；CK5/6、P63、Calponin、S100及SMA均显示肌上皮(+)；Actin(-)。	2015-01-20	2015-01-27 08:59:00	（1）结节数枚，直径0.3-0.8cm。（2）炭黑结节1枚，直径0.6cm。（5）气管一段，长1.8cm，直径1.9cm，距离一侧切缘0.5cm，粘膜表面呈结节状隆起，大小1.4×1×0.9cm，肿物临近另一侧切缘。	气管	2	气管支气管	6	1	R1	1	1				3	1	不确定	1	1		无	0	0	无	未报		有	CK7(3+),Vimentin(1+),CD117(2+)；CK5/6、P63、Calponin、S100及SMA均显示肌上皮(+)；Actin(-)。	有LNM,术后放疗	2016-10-09
P		543148		1	BC	5		40		60	2	100	65	1219221	耿喜娥	2	2	头颈外科1	（1）（鼻侧壁及后鼻孔肿物） 鼻侧壁及后鼻孔腺样囊性癌，（11）（上颌窦粘膜）、（12）（颞腭窝肿物）、（14）（左鼻中隔）、（15）（筛窦）、（16）（鼻咽顶）、（2）（上颌窦内侧壁切缘）冰、（3）（上颌窦底壁切缘）冰、（4）（翼腭窝肿物）冰、（5）（咽侧壁切缘）冰、（8）（中鼻甲后端切缘）冰、（9）（鼻咽顶切缘）冰、（10）（鼻泪管切缘）冰 可见癌组织浸润，其中（3）（上颌窦底壁切缘）冰 可见侵犯骨组织；（4）（翼腭窝肿物）冰 可见侵犯神经纤维。 （17）（上鼻甲）、（18）（鼻泪管）、（6）（鼻后孔内侧切缘）冰、（13）（咽侧壁切缘2）冰未见癌。（7）（鼻后孔底壁切缘）冰冻切片未见癌，石蜡切片中可见小灶癌组织浸润。 （病理号543098-100、543115-120、543134）	2015-01-26	2015-01-30 09:12:00	（1）不整形肿物、鼻甲及骨组织，其中肿物直径1.5cm，切面灰黄颗粒状，鼻甲粘膜光滑，总大小3×3.5×1.5cm，与肿物无明显粘连。（11）灰粉粘膜组织，光滑，面积3×3×0.4cm。（12）不整形灰黄组织3块，总直径1.5cm。（14）灰黄片状组织，大小2.5×1.5×0.3cm。（15）破碎的灰白粘膜及骨组织，粘膜光滑，总大小2.5×2.5×0.4cm。（16）灰粉不整形组织一块，大小1×0.4×0.2cm。（17）灰黄不整形组织2块，直径0.5cm。（18）灰白组织一块，直径0.5cm。	鼻侧壁及后鼻孔	1	鼻腔鼻窦颅底	4	1	扩切，冰冻切缘+后再扩大范围	1	1				3	1	不确定	x	2	骨	无	0	0	无	未报		无		鼻衄鼻堵3月，外院鼻腔肿物2.3cm切除，术后放疗	2017-01-06
P卓	3.5，直径100/100/150/170i-100/200p，ki20%	547096		2	G	1	70	30			1	100	67	1221337	石瑞霞	2	2		（1）（右乳改良根治标本） 乳腺腺样囊性癌，合并少许导管原位癌成分。肿瘤位于乳腺内下象限，大小2.2×1.8×1.0cm，累及皮肤真皮浅层，乳头未见Paget's病，未累及胸肌筋膜。周围乳腺呈萎缩性改变。 淋巴结未见转移癌（0/7） 腋窝淋巴结 0/6 （2）（右腋窝淋巴结） 0/1 免疫组化结果显示:ER(+1-10%弱阳（浸润癌）；导管内+＞90%强阳),PR(-（浸润癌）；导管内+＞90%强阳),HER2(-),CK5/6(2+),EGFR(2+),P63(2+),Calponin(-),CD10(-),CK14(2+),SMA(1+),S100(1+),Ki67(+局部20%)。	2015-02-25	2015-03-01 09:12:00	（1）右乳改良根治标本，大小23×18×3cm，附梭形皮肤，面积11×6cm，乳头无内陷、糜烂、结痂,于内下象限皮肤表面见一皱缩区，面积1.5×1.5cm，书页状切开乳腺，于皮肤皱缩区下见一肿物，大小2.2×1.8×1cm，切面灰白质硬，距胸肌筋膜0.5cm，紧邻皮肤，周围乳腺灰白灰黄质韧，腋窝脂肪大小5×4×1.5cm，经多人反复寻找找到结节数枚，直径0.2-2cm。（2）结节1枚，直径1cm。	右乳	2	乳腺	7	1	R0	0	1		1	2.2cm	2	1	无	0	0		无	0	0	无	未报		有		LN无转移，术后阿那曲唑内分泌治疗	2019-06-17
P		548003		15	G	1	80	20			1	100	47	1176284	程克华	2	1	头颈外科2	（4）（全喉气管及肿瘤）、（3）（食管壁及肿瘤）（参见547891-892） 气管腺样囊性癌，可见脉管瘤栓及神经侵犯。肿瘤浸润气管壁全层，累及声门下、左侧声门旁间隙、左侧声带肌、环状软骨、双侧甲状腺、颈前软组织、肌肉组织及食管壁纤维膜及肌层。舌骨、会厌及舌根切缘、双侧声门粘膜、双侧杓会皱襞及切缘、甲状软骨板、左侧甲状旁腺未见癌累及。（1）（左侧气管下切缘）冰、（2）（右侧气管下切缘）冰 气管壁组织内见癌累及。 甲状腺呈桥本氏甲状腺炎。 pTNM分期：pT4	2015-03-02	2015-03-08 13:46:00	（4）全喉双侧甲状腺切除标本，总大小9×4.5×2.8cm，舌骨完整大小4×4.5×1.5cm，会厌双侧声门及声门下粘膜光滑，气管壁及环状软骨处明显增厚质硬，切面灰黄质地细腻。增厚处总大小5×1.5×4cm与甲状腺紧密粘连，左侧甲状腺3×2×1.5cm，右侧4.5×2.5×2cm，左侧甲状腺旁见结节两枚，直径均0.6cm。（3）不规则灰黄灰粉组织一块，大小2.5×1.5×1cm，切面为灰黄肿瘤组织。	气管	1	气管	6	1	送检切缘+	1	1				4	1	有	x	2	候，双侧甲状腺，食管壁	无	0	0	无	未报		无		累及声门下、食管肌层、颈部软组织	2019-11-15
P		551287		9	G	1	70	30			1	100	46	1228900	聂进	1	1	胸外科1	（7）（左全肺） 肺腺样囊性癌，可见脉管瘤栓及大量神经侵犯。肿瘤累及主支气管及上叶叶、段支气管、肺组织和脏层胸膜，侵犯肺门血管壁外膜及局部心包壁，未累及下叶肺组织。主支气管切缘可见癌。周围肺呈肺气肿改变。 淋巴结转移性癌（2/19） 上叶肺外淋巴结 0/1 上叶肺内淋巴结 2/2 下叶肺内淋巴结 0/4 (1)（隆突下淋巴结（7区）） 0/4 (2)（右主支气管旁淋巴结） 0/1 (3)（上叶支气管旁淋巴结（11区）） 0/1 (4)（4L区淋巴结） 0，纤维脂肪组织。 (5)（上纵隔淋巴结） 0/6 （6）（胸膜结节） 纤维脂肪组织伴出血。 pTNM分期：pT3N1(请结合临床)	2015-03-20	2015-03-26 09:55:00	（7）左全肺，上叶大小18.5×8.7×6.5cm，下叶大小13.5×8.7×6.5cm，支气管切缘直径2cm，肺膜表面光滑，于上叶支气管根部见一粘连片状软组织，面积1.7×1.2cm，疑为心包，沿支气管剖开肺，距支气管切缘1cm上叶肺内见一肿物，大小4×3.2×1.7cm，肿物累及主支气管及上叶叶段支气管，紧邻脏层胸膜。下叶叶段支气管粘膜光滑。肺内外找到结节数枚，直径0.7-1.3cm。多切面切开周围肺，上叶呈海绵状，下叶周围肺灰红质软，未见明显异常。（1）结节数枚，直径0.7-1.2cm。（2）结节1枚，直径0.3cm。（3）结节1枚，直径1cm。（4）可疑结节1枚，直径0.6cm。（5）结节数枚，直径0.2-0.5cm。（6）结节1枚，直径1cm。	左肺门	2	气管支气管	6	1	R1伴LNM和侵犯心包	1	1				3	1	有	1	1	心包	无	0	0	无	未报		无		术后外院放疗	2017-09-27
Re		553547		2	G	1	80	20			1	100	49	741874	王焕香	2	1	头颈外科1	“头皮腺样囊性癌外院术后” （2）（头皮肿物）、（1）（头皮骨膜）冰 真皮及皮下组织中见涎腺型癌浸润，结合病史及形态，符合腺样囊性癌。肿瘤延伸至皮下组织断端，未累及表皮。 （参见553461）	2015-04-01	2015-04-09 10:52:00	头皮组织，大小3.5×1.5×1cm，皮肤表面见一陈旧瘢痕长约2.8cm。	头皮	1	头皮	16	1	有	1	2	10年				1	不确定	x	2		无	0	0	无	未报		无		2004年外院局切，2005年复发3-20外院局切切缘不净至我院2005-4-5第一次扩切，2014-4-10术区触及结节，2015-3-18颅CT提示复发	2018-12-24
Re-0		557517		5	G	1	100				1	100	51	1236407	李玉梅	2	2		“外阴病损外院切除术后” （2）（部分右外阴组织及结节） 外阴组织内可见肿瘤组织，形态符合腺样囊性癌，间质中可见异物（缝线）及炎细胞浸润，符合术后复发。皮肤切缘及（1）（外阴肿物基底切缘）冰1未见癌。	2015-04-24	2015-04-30 14:59:00	（2）不整形皮肤及皮下组织，局灶区有色素沉着，总大小6×4×2cm，长缝线处可见灰白质硬区。大小1.5×1.2×1cm。短缝线处粘膜色素似有沉着，未见其他异常。	外阴	2	外阴	11	1	距烧灼处<0.5mm	1	2				1b	1	不确定	x	2		无	0	0	无	未报		无		2014-12发现外阴肿物，2015-3外院切除，本次大概还有1cm	2015-05-04
P		558332		7	S	3		30	70		3	100	51	1234628	张素娟	2	1		（1）（上唇肿物） 上唇腺样囊性癌，伴纤维化及胶原变性，可见神经侵犯，肿瘤累及表皮、横纹肌及局灶软组织断端。（2）（内切缘）冰1、（3）（上切缘）冰2、（4）（外切缘）冰3及（5）（牙龈切缘）冰4均未见癌累及。 pTNM分期：pT1	2015-04-29	2015-05-08 14:31:00	（1）粘膜组织一块，大小2.5×2×1.5cm，中央见一灰白隆起区，范围2×1cm，距侧切缘最近0.1cm。	上唇	1	唇	8	1	R1，镜下延伸烧灼处	1	1					1	不确定	x	2		无	0	0	无	未报		无		2cm，未扫淋巴结	2019-11-13
Re-0		558393		2	C	2		90	10	核分裂较多	2	100	45	1233679	贺丽	2	1		“左侧腭部腺样囊性癌术后” （1）（颅底肿瘤）冰、（2）（颅底肿瘤） 腺样囊性癌。	2015-04-30	2015-05-06 14:24:00	（2）破碎肿瘤组织及膜状组织，总大小4.5×3×0.5-1.5cm。	左前颅底-颅鼻沟通	1	口腔（上腭），复发为鼻腔鼻窦颅底	5	1	左鼻腔-上颌窦-翼颚窝-左海绵窦5cm减症状，术后影像仍有残留R2	1	2				4	0	不确定	x	2		无	0	0	无	未报		无		2008-8-18外院左上颌窦术后行放疗,本次术后天坛行伽马刀3次治疗	2019-6-3复发广泛有压迫，电话18235421332和13283666879可能去世？
P		564137		5	BC	5		50	核分裂多	50	2	100	50	1245894	弓合心	1	1	头颈外科1	（2）（左侧咽旁肿瘤）冰及冰余 上皮肌上皮源性肿瘤，符合腺样囊性癌，部分间质玻璃样变，可见神经侵犯。 （1）（左颈2区淋巴结） 淋巴结未见转移癌（0/5），另见涎腺组织	2015-05-29	2015-06-04 09:34:00	结节数枚，直径0.8-1.3cm。	左侧咽旁翼腭窝	1	咽旁间隙	21	1	口咽鼻咽旁占位4cm，边缘<1mm	1	1	只看冰冻号			口咽分期？大小查	1	不确定	0	0		无	0	0	无	未报		无		术后放疗，治疗效果不好顾虑多慎电话，本人13753123899和妻18626863486	2017-09-22
P-缺5号及以后片子？	1	565078		1	G	1	100				1	100	56	1244572	丁玉凤	2	2	头颈外科1	（1）（气管肿物）冰及冰余 腺样囊性癌，累及气管壁外膜。 免疫组化结果: CD117(2+),CK18(1+，散在细胞),CK5&6(2+), Calponin(肌上皮+),S100(2+),SMA(1+),TTF1(-)。 （5）（基底切缘）冰、（10）（基底切缘2）冰、（6）（声门下组织）、（7）（声门下切缘）冰、（9）（环状软骨下缘） 送检组织中均见癌浸润。 （2）（气管上切缘）冰、（3）（气管下切缘）冰、（4）（气管膜样部切缘）冰 纤维及软骨组织，未见癌。 （8）（甲状腺部分左叶）结节性甲状腺肿。	2015-06-03	2015-06-10 09:37:00	（6）灰黄不整形组织一块就大小1×0.6×0.3cm。（8）甲状腺组织大小3×1×0.5cm。（9）灰白不整形组织两块，大小1×0.6×0.2cm。	气管	1	气管	6	1	R1,肿瘤2cm呈腔内外生长	1	1				3	0	不确定	x	2		无	0	0	无	未报		有	CD117(2+),CK18(1+，散在细胞),CK5&6(2+), Calponin(肌上皮+),S100(2+),SMA(1+),TTF1(-)。	术后放疗	2017-06-08
Re		565397		9	G	1	80		20		2	100	30	1241180	侯明芳	2	1	头颈外科2	“上颌窦癌术后5年” （左侧上颌骨及眶内容） 上颌窦腺样囊性癌，建议做免疫组化进一步明确证实，符合术后复发（建议提供5年前手术病理类型）。肿瘤侵透上颌窦壁，并累及鼻甲粘膜固有层、皮下脂肪、眶内容脂肪及眼球巩膜，可见神经侵犯，未累及泪腺、视神经、牙龈及硬腭。局部皮下脂肪切缘组织烧灼处可见癌。牙龈切缘、硬腭切缘及视神经断端均未见癌。	2015-06-03	2015-06-11 15:35:00	左侧上颌骨及眶内容切除标本，总大小9×6.5×2.5-5cm，其中眶内容大小4.5×3.5×3cm，未见皮肤。上颌骨附牙齿6颗，门齿缺失，各牙齿见不同程度的龋齿，牙龈及硬腭粘膜光滑。下鼻甲粘膜粗糙。粗糙区面积1.5×1.5cm，切面于上颌内见一灰白肿物，大小3.5×4×3.5cm。肿物切面灰白质细界不清，侵透上颌窦壁，并侵犯鼻甲粘膜，侵犯皮下脂肪。并侵犯眶内容脂肪及眼球巩膜。附视神经长1.5cm，直径0.4cm，未见肿物累及。于眼球上方可见一泪腺样组织，大小3×1.5×0.5cm。	左上颌窦	1	鼻腔鼻窦颅底	4	1	R1,复发灶切除	1	2	5年			4a	1	不确定	x	2	眼球，上颌骨	无	0	0	无	未报		无		2010外院上颌窦癌术后，2015-复发，术后外院放疗	2017-04-18
Re		572619		5	C	2	20	80			1	100	51	1251004	郭立新	2	2	头颈外科1	“右侧颌下腺腺样囊性癌术后” （3）（部分右下颌骨、颌下及口底组织） 纤维脂肪及肌肉组织内见腺样囊性癌浸润，结合临床，符合肿瘤术后复发，可见脉管瘤栓及神经侵犯。肿瘤累及下颌骨皮质，紧邻软组织切缘，未累及（4）（颅底下颌神经）及下颌骨外侧肌肉、纤维组织。（1）（颏下神经远端）冰、（2）（下颌神经近端）冰均未见癌。 （参见572522、572523）	2015-07-10	2015-07-16 17:53:00	右下颌骨及部分肌肉组织，总大小8×5×2cm，下颌骨大小7×3.5×1cm，附牙齿4颗，下颌骨外侧未附牙龈，内侧组织与下颌骨易剥离，切面局灶灰白胶冻状界尚清。（4）灰红组织两块，1.5×1×0.5cm。	右侧颌下腺	1	颌下腺	3	1	侵犯舌下腺下颌骨牙龈3cm，紧邻软组织，不保证R0	1	2				4a	1	有	x	2	下颌骨	无	0	0	无	未报		无		6年前右颌下腺外院手术及扩切手术	2018-04-19
P0		575225		4	SG	5	40	20	40		3	100	62	1255892	韩平朋	2	2	头颈外科1	（1）（口底肿物） 涎腺腺样囊性癌，可见神经侵犯。肿瘤累及鳞状上皮粘膜，未累及横纹肌组织。（2）（口底肿物后切缘）冰及（3）（神经切缘系线处为远端）冰内见腺样囊性癌浸润。 （参见575171、575199）	2015-07-23	2015-07-29 14:46:00	灰褐组织大小3×2.5×1.5cm，边缘带少许涎腺组织大小2.5×1×0.5cm。切面灰白质细界欠清，未累及涎腺。	口底	1	舌下腺	2	1	R1,肿瘤4×2cm条形，累及舌神经	1	1				3核实大小实质外侵犯	1	不确定	x	2		无	0	0	无	未报		无		建议术后放疗不知后续	2015-07-29
P		576315		5	C	2	30	50	20		2	100	45	1257859	魏海平	1	1	头颈外科1	（1）（左舌下腺肿物）冰及冰余（参见576315） 舌下腺腺样囊性癌，可见神经侵犯。（3）（舌下腺切缘）未见癌。 淋巴结未见转移性癌（0/17） （2）（颌下清扫） 0/4，另见涎腺组织。 （4）（2区淋巴结） 0/13 pTNM分期：pT3N0	2015-07-29	2015-08-03 15:48:00	（2）颌下腺组织及少许脂肪，颌下腺组织，大小5×2.5×3cm，切面灰黄分叶状，未见明确异常。周围脂肪找到结节数枚，直径0.5-1.5cm。（3）灰白质略硬组织数块，直径0.5-1cm，全埋。（4）结节数枚，直径0.5-1cm。	左舌下腺	1	舌下腺	2	1	肿瘤与舌下腺完整切除4.6cm,边缘<1mm	1	1	只看冰冻号			3核实大小实质外侵犯	1	不确定	0	0		无	0	0	无	未报	2019-5-15甲状腺右叶近峡部结节可疑恶性，未穿刺？查	无		术后放疗	2019/11/19电话15947040078和13789546253
P		583707		6	G	1	90	10			1	100	63	1264295	刘爱叶	2	2	胸外科1	（9）（左全肺） 肺主支气管壁腺样囊性癌。肿瘤主要位于主支气管壁内，浸透主支气管壁达管壁周围纤维脂肪组织，累及上下叶支气管分叉，局灶累及邻近上、下叶叶支气管壁，可见多灶神经浸润，未见明确脉管瘤栓，肺实质内未见癌。 (8)（支气管切缘）冰未见癌。上、下叶周围肺未见显著病变。 淋巴结未见转移性癌（0/19）。 支气管分叉处淋巴结 0/2 上叶肺外淋巴结 0/1 下叶肺外淋巴结 0/1 （1）（肺动脉干旁淋巴结） 0/2 （2）（隆突下淋巴结（7区）） 0/3 （3）（主动脉窗淋巴结（5区）） 0/2 （4）（主动脉弓旁淋巴结（6区）） 0/5 （5）（左主支气管旁淋巴结） 0/1 （6）（第4区淋巴结） 0/1 （7）（左侧气管旁淋巴结（4L区）） 0/1 免疫组化结果显示:AE1/AE3(3+),CK5/6(+),P63(+),S100(+),CK7(灶+),TTF1(-),CD117(3…	2015-09-07	2015-09-16 08:56:00	（9）左全肺切除标本，上叶肺大小11×9×系膜光滑，下叶肺大小12×8×3cm，胸膜光滑，上下叶叶间裂清晰，距主支气管切缘1.0cm主支气环管壁弥漫管壁增厚，长约2.0cm，中央局灶隆起，隆起区大小1.0×0.5×0.3cm，切面灰白似局限于主支气管壁内，紧邻上下叶支气管分叉，多切面切开上下叶周围肺，肺内未见明确肿物及质硬区，肺组织红褐质软。上下叶肺外淋巴结数枚，直径0.5-0.7cm。（1）炭黑结节两枚，直径0.3-0.4cm。（2）结节数枚，直径0.5-1.5cm，部分结节融合灰黑质中。（3）炭黑结节两枚，直径0.4-0.5cm。（4）结节样物数枚，直径0.3-0.5cm。（5）炭黑组织一粒，直径0.3cm。（6）灰黑组织一粒，直径0.2cm。（7）灰黑组织一粒，直径0.4cm。	主支气管	2	气管支气管	6	1	R0	0	1				1c	1	无	0	0		无	0	0	无	未报		有	AE1/AE3(3+),CK5/6(+),P63(+),S100(+),CK7(灶+),TTF1(-),CD117(3+)。	左全肺切除	2016-09-28
P0		588154		5	SG	5	40		60		3	100	54	1266455	候翠平	2	2	头颈外科1	（1）（部分上颌骨）、（2）（上颌骨浅面组织）冰及冰余 （参见588072） 腺样囊性癌，可见神经侵犯，肿瘤侵犯横纹肌及上颌骨骨质，未累及鳞状上皮粘膜。（5）（上颌神经切缘）可见肿瘤累及。（4）（软腭切缘）冰 未见癌。（参见588085） （3）（硬腭切缘）冰 （参见588084） 纤维组织中见腺样囊性癌累及。 pTNM分期：考虑为pT4a（供临床参考）	2015-10-08	2015-10-12 17:12:00	（1）破碎上颌骨、牙齿及肿物，总大小9×9×4cm，其中一块似为部分硬腭，大小5×4×2cm，上附三颗牙齿，粘膜面尚光滑，软硬腭交界基底处可见粗糙不规则肿物，大小约4.5×3.5×1.5cm。（5）灰褐组织，直径0.6cm。	上颌窦	1	鼻腔鼻窦颅底	5	1	R1，上颌窦-硬腭-翼颚窝-翼内外肌-牙槽骨	1	1				2	1	不确定	x	2	上颌骨	无	0	0	无	未报		无		建议术后放疗不知后续	2015-10-15
P		594300		7	BC	5	10	40		50	2	100	44	1276525	田学忠	1	1	头颈外科2	（1）（甲状腺部分右叶）（2）（气管膜样部）冰（参见594233）（3）（全喉） 气管腺样囊性癌。肿瘤侵透气管壁全层达周围软组织并累及甲状腺左叶及部分右叶；累及左侧声门下区；未累及双侧声室带、前联合及甲状软骨膜。气管膜样部、气管切缘、舌根切缘未见癌。	2015-11-09	2015-11-13 16:33:00	（3）全喉切除标本，未见会厌软骨，可见双侧声室带、双侧声门下区及前联合，大小8×5×3.5cm，双侧声室带粘膜光滑，未见肿物。左侧甲状腺叶大小5×3.5×2.5cm。气管长1.5cm，周长4cm，距气管切缘1.5cm气管左侧壁见一肿物，大小3.5×2×1.8cm，切面灰白实性质硬，侵及气管全层及左侧甲状腺。（1）甲状腺组织，大小1.5×1.3×0.8cm，切面灰红色，局灶灰白，范围约0.8×0.4cm，全埋。	气管	1	气管支气管	6	1	达气管壁周软组织和甲状腺，气管边缘<1mm	1	1				4	1	不确定	x	2	甲状腺，喉	无	0	0	无	未报		无		术后咽漏愈合	2020-02-07
P卓	5.5，直径50微米围，ki15%	594530		6	GC-5号蜡块认为有S，且ki升高	5	50	40	5	5	2	100	59	1278392	高亚玲	2	2	乳腺外科1	(4)（右乳单纯切除标本） 结合形态及免疫组化结果符合乳腺腺样囊性癌，未见明确脉管瘤栓及神经侵犯。乳头、皮肤及胸肌筋膜未见肿瘤，周围乳腺呈腺病改变。 淋巴结未见转移性癌（0/3） （1）（前哨淋巴结1）冰 0/1 （2）（前哨淋巴结2）冰 0/1 （3）（前哨淋巴结3）冰 0/1 免疫组化结果显示:ER(-),PR(-),HER2(1+),CK5&6(3+),P63(2+),E-cadherin(3+),EGFR(-),P53(-),TOP2A(1+),Ki-67(10% +)。 pTNM分期：pT1N0(sn）	2015-11-10	2015-11-16 17:09:00	乳腺大小18×17×3cm，附梭皮面积13×4.5cm，乳头皮肤未见异常，书页状切开乳腺，于外上象限见一灰白肿物，大小2.2×2.5×1.5cm，切面灰白灰黄实性质硬界欠清，肿物距胸肌筋膜最近0.2cm。周围乳腺灰白灰黄实性质韧。	右乳	2	乳腺	7	1	R0	0	1		1	2.5cm	2	1	无	0	0		无	0	0	无	未报		有	ER(-),PR(-),HER2(1+),CK5&6(3+),P63(2+),E-cadherin(3+),EGFR(-),P53(-),TOP2A(1+),Ki-67(10% +)。 pTNM分期：pT1N0(sn）		2019-11-28
P		599800		4	S	3	5	30	65		3	100	53	1282004	赵玉花	2	2	头颈外科1	（1）（右颌下腺及肿物）冰及冰余 （参见599800） 右颌下腺腺样囊性癌，肿瘤侵犯（6）（舌神经）。 （4）（舌神经远端切缘）冰 （参见599825）及（5）（舌神经近端切缘）冰 （参见599826）未见癌。 淋巴结转移性癌（2/40） （2）（右颌下LN1） 1/1 （3）（右颌下LN2） 0/1 （7）（右颈1区LN清扫） 0/4 （8）（右颈2区LN清扫） 1/17 （9）（右颈3区LN清扫） 0/17 pTNM:T3N2	2015-12-04	2015-12-09 09:48:00	（2）结节1枚，直径1cm。（3）结节1枚，直径1.5cm。（6）灰褐组织，大小3×0.1-0.7×0.5cm。（7）结节数枚，直径0.5-0.6cm。（8）结节数枚，直径0.5-1.2cm。（9）结节数枚，直径0.5-1.5cm。	右颌下腺	1	颌下腺	3	1	距烧灼边缘<1mm,侵犯软组织和舌神经，LNM	1	1				3核实大小实质外侵犯	1	不确定	2	1		无	0	0	无	未报		无		8年前自行扪及肿物逐渐长大	2016-03-16
Re		600838		1	G	1	95	5			1	100	50	1284271	刘翠英	2	1	头颈外科2	“头皮腺样囊性癌多次术后” （3）（头皮肿物） 真皮及皮下组织内可见癌组织浸润，结合病史及形态，符合腺样囊腺癌，肿瘤累及横纹肌，可见神经侵犯。基底切缘、（1）（上切缘）冰及（2）（下切缘）冰均未见癌（参见600700、600701）。	2015-12-09	2015-12-15 18:52:00	皮肤及皮下脂肪切除标本，大小6×3.5×0.7cm，皮肤面积6×3.5cm，皮肤中央见一疤痕，长3cm，切面未见明确肿物。	头皮	1	头皮	16	1	扩切，距基底最近处1mm	0	2				3核实神经侵犯程度	1	不确定	x	2		无	0	0	无	未报		无		2003发现，2005-8切未送，2014-2切未送，2015-11外切	2019-06-13
P		602858		4	G	1	95	5			1	100	33	1283355	蔺红霞	2	1	妇科2	“外阴腺样囊性癌2次术后” （6）（外阴扩大切除标本（缝线为下切缘）） 纤维结缔及横纹肌组织中见腺样囊性癌浸润，未累及表皮，肿瘤延伸至基底烧灼边缘，伴间质大量急、慢性炎细胞浸润和多核巨细胞反应，符合术后改变。下切缘可见癌浸润。（4）（下基底）冰见极少许腺样囊性癌浸润，（10）（下基底2）见极少许胞浆透明的细胞巢，考虑为癌（经连切片病变消失）。（1）（内侧基底）冰、（2）（外侧基底）冰、（3）（上基底）冰及（7）（下切缘（缝线处为基底））冰均未见癌。 （5）（肛提肌）冰、（8）（直肠前壁）冰、（9）（直肠前壁2）冰 纤维脂肪及肌肉组织中见腺样囊性癌浸润。 （参见602635-602638、602642、602654、602655、602657）	2015-12-04	2015/12/28 12:06:00是第二次扩切的	（6）外阴扩大切除，大小7×3×4cm，皮肤面积6.5×3cm，一端附缝线，皮肤表面附毛发，未见明确肿物。皮下脂肪组织内局灶灰黄质稍硬，直径1cm。（10）脂肪组织，大小1.5×1×1cm。	外阴	2	外阴	11	1	扩大切，肛提肌直肠前壁+	1	2				2	1	不确定	x	2	肛提肌，直肠前壁	无	0	0	无	未报		无		2013年自觉小阴唇肿物，2015-10-26外院局切，第一次本院扩切术后切缘+，行第二次扩切，术后放疗	2018-09-25
P0		604277		1	C	2	5	70	5	20	2	100	51	1286943	杨凤霞	2	2	头颈外科2	（2）（右咽旁肿物）冰 （参见604205）、（3）（右颌下+右咽旁肿物） 颌下腺腺样囊性癌，可见神经侵犯，肿瘤大小4.5×3.5×2.5cm，累及周围纤维脂肪及横纹肌组织。 淋巴结转移性癌（1/23），形态及免疫组化染色支持为转移性甲状腺乳头状癌，未累及淋巴结被膜外。 颌下淋巴结 0/3 （1）（右面前淋巴结）冰 0/1 （参见604150） （4）（右颈3区清扫） 0/7 （5）（右颈2区清扫） 1/10，免疫组化结果:PAX8(3+),TG(3+),TTF1(3+) （6）（右颈2b区清扫） 0/2	2015-12-28	2016-01-04 17:03:00	（3）灰红不整形组织一块，质较硬，大小1.5×4×3cm，切面部分区似为涎腺组织，其余大部分区被肿物占据，肿物大小4.5×3.5×2.5cm，边界不清，周围脂肪触及结节数枚，直径0.4-0.6cm。（4）结节数枚，直径0.6-0.3cm。（5）结节数枚，直径0.6-0.4cm。（6）结节数枚，直径0.2-0.3cm。	右颌下腺	1	颌下腺	3	1	侵犯颌下舌下腺和口底肌肉、舌及舌下神经	1	1		1	4.5cm	3	1	不确定	0	0		无	0	0	无	未报	淋巴结转移性甲乳癌	无		3年前发现，近一年明显长大，术后建议放疗	2016-01-28
Re		605149		2	S	3	5	10	80	5	3	100	48	1285056	张素芳	2	1	头颈外科1	“左外耳道腺样囊性癌术后17年” （左侧外耳道及乳突肿物） 形态符合腺样囊性癌，肿瘤累及真皮及软骨。 建议借阅原手术切片进一步对比。	2015-12-30	2016-01-07 11:31:00	灰黄破碎组织总大小3×3×1.5cm，切面灰白灰黄质槽脆，直径1.5cm。	左外耳道	1	外耳道	9	1	复发切除，未送切缘	1	2	17年			外耳分期？	0	不确定	x	2		无	0	0	无	未报		无		1998年外切术后放疗，本次术后建议回当地商讨放疗事宜，回当地放疗	2018-12-27
P		605476		4	G	1	80	15	5		2	100	51	1289169	王贵平	2	2	胸外科2	（7）（左全肺）、（4）（左肺上叶口肿物及淋巴结）冰及冰余 腺样囊性癌，肿瘤位于左主支气管壁及左肺上叶支气管腔内，临近但未累及肺门处大血管。肿瘤大小5×1.9×1.8cm，可见神经侵犯及脉管瘤栓。肿瘤未累及脏层胸膜及下叶叶、段支气管。（5）（左主支气管切缘）冰 未见癌，上叶周围肺呈肺气肿改变，下叶周围肺局部呈阻塞性肺炎伴机化改变。 淋巴结转移性癌（2/35），部分淋巴结破碎，无法准确计数。 上叶肺内淋巴结 1/3 上叶肺外淋巴结 0/2 下叶肺内淋巴结 0/2 （1）（肺门淋巴结（10区）） 1/2 （2）（隆突下淋巴结（7区）） 0/12 （3）（4L淋巴结） 0/6，淋巴结被膜外纤维组织中见少许癌浸润。 （6）（左喉返神经旁淋巴结） 0/8 pTNM分期：pT2bN1 （参见605383、605388）	2016-01-04	2016-01-07 15:58:00	（7）左全肺切除标本，上叶肺大小20×11×5.5cm，下叶肺大小18.5×12×5.5cm，叶间裂发育不全，主支气管长4cm，直径1.9cm，距支气管断端约0.2cm于主支气管腔内见一肿物，大小5×1.9×1.8cm，切面灰白实性质硬界不清，累及主支气管及上叶叶支气管，未累及下叶叶段支气管，与肺门大血管关系紧密，上下叶肺内外炭黑结节数枚，直径0.6-1cm，上下叶周围肺灰红质软，大部分呈灰黄海绵状。（1）炭黑结节两枚，直径0.8-1.8cm。（2）炭黑结节数枚，直径0.5-2.5cm。（3）炭黑结节数枚，直径0.5-3cm。（6）炭黑结节数枚，直径0.2-0.6cm。	支气管	2	气管支气管	6	1	R0,LNM	0	1				3	1	有	1	1		无	0	0	无	未报		无		随访	2017-09-29
P		609615	实性区需与基底鳞鉴别	16	S	3	5	5	90		3	100	43	1292646	魏东	1	1	头颈外科2	（2）（全喉左侧甲状腺部分气管左气管食管沟清扫）、（1）（左气管壁肿物）（参见609566）、（3）（气管左侧壁切缘）冰 （参见609570） 气管分化差的癌，细胞呈实性巢片状、少许筛孔状及腺样排列，细胞小而一致，可见散在多灶性坏死；并见少许神经侵犯及一灶脉管瘤栓；未见与粘膜的移行关系；结合免疫组化染色结果，符合实体型腺样囊性癌。肿瘤累及左侧环状软骨及左侧甲状软骨板，累及左侧声门旁间隙；并小灶累及左侧甲状腺被膜，未累及左侧甲状腺实质；未累及双侧声室带、前联合、会厌软骨；未累及会厌前间隙及右侧声门旁间隙。双侧杓会皱襞切缘、舌根切缘、气管左侧壁切缘及气管切缘均未见癌。 气管食管沟淋巴结一枚，未见转移癌（0/1）。另见少许甲状旁腺组织。 此例形态不典型，需要鉴别的肿瘤包括实体型腺样囊性癌和基底细胞样鳞状细胞癌。肿瘤未见与粘膜移行关系，并见少许神经侵犯证据；免疫组化染色结果未见肯定鳞状分化证据，…	2016-01-25	2016-02-01 11:02:00	（2）全喉切除标本，大小12×6×4cm，会厌及双侧声室带粘膜光滑，于左侧环状软骨粘膜下可见一肿物，大小3.8×3.5×2.5cm，切面灰黄灰红质硬颗粒状，累及环状软骨及气管，并侵犯左侧甲状软骨板及少部分左侧声门旁间隙；未累及双侧声室带、会厌软骨及会厌前间隙；未累及右侧声门旁间隙。气管旁可见部分灰红甲状腺组织，大小5×3.5×2cm，多切面切开，切面似可见肿瘤侵犯。另附游离舌骨，大小4.5×3.5×1.2cm，骨膜下剔除软组织，舌骨骨质光滑，未见肿瘤侵犯。气管周围软组织中找见可疑结节多枚，直径0.3-0.5cm。	气管	1	气管	6	1	距离边缘<1mm，实体型ki67-40%，早读与基底鳞癌鉴别	1	1				4	1	有	x	0	喉	无	0	0	无	未报		无		术后放疗	2017/4/10，电话妻15133258901和15832296222，预后不佳？
Re-0	9号-围神经炎症	610392		7	C	2	5	90	5		2	100	76	1294640	李秀芹	2	2	头颈外科1	“右侧腮腺癌三次手术后1年余” （1）（部分下颌骨及腮腺及复发肿物） 涎腺腺样囊性癌，结合病史，符合术后复发。肿瘤累及皮肤皮下及横纹肌组织，呈多结节分布；未累及下颌骨骨膜。周边及基底切缘未见癌。 另见皮肤组织，真皮层胶原纤维增生、少许异物（缝线）及异物巨细胞反应。	2016-01-27	2016-02-02 09:57:00	（1）带皮不整形软组织一块，附下颌骨及涎腺，总大小8.5×6.5×4cm，表面附梭皮面积6×1.7cm，皮肤表面见一陈旧瘢痕，长3cm，切面于皮下及涎腺组织中见一灰白多结节状肿物，大小5.5×3.5×2.5cm，累及肌肉，紧邻下颌骨，距基底最近2cm，距侧切最近0.5cm。	右腮腺	1	腮腺	1	1	复发扩切，多灶，累及面神经主干颧弓髁突颞下颌关节	1	2	三次手术后1年余”			3	1	有	x	2		无	0	0	无	未报		无		2008和2010外院术后报混合瘤，2014外院术后ADCC	2016/2/2出院
P		627768		4	G	1	70	15	5	10	2	100	49	1311329	孔令暖	2	1	头颈外科2	（4）（部分喉及环状软骨） 左侧声门下腺样囊性癌，肿瘤侵透声带肌达声门旁间隙，累及环状软骨，未累及室带及甲状软骨板。（5）（气管切缘1）冰 （参见627719）、（7）（后壁切缘）冰 （参见627721）及（8）（左劈裂切缘）冰 （参见627722）均未见癌。 （6）（气管切缘2）（参见627720） 被覆假复层纤毛柱状上皮的粘膜组织，冰冻切片中未见癌，于冰冻剩余组织石蜡深切片中见一小灶癌组织浸润。 淋巴结未见转移癌（0/4） （1）（左颈3区淋巴结1）冰 0/1 （参见627705） （2）（左颈3区淋巴结2）冰 0/1 （参见627706） （3）（左颈3区淋巴结清扫） 0/2 免疫组化结果显示:AE1/AE3(3+),CD117(2+),P63(肌上皮+),Ki-67(10%+),CK7(1+),Calponin(肌上皮+)。 pTNM分期：考虑为pT4aN0，请进一步结合临床	2016-04-27	2016-05-04 17:46:00	（3）结节2枚，直径0.3-0.4cm。（4）部分甲状软骨，大小3×3×0.2cm，于左侧见粘膜及肿物，肿物大小2×1.5×2cm，切面灰黄瓷白色界不清，粘膜光滑，另见部分舌骨。	左声门下	1	喉	12	1	有R1	1	1				4a	1	不确定	0	0		无	0	0	无	未报		有	:AE1/AE3(3+),CD117(2+),P63(肌上皮+),Ki-67(10%+),CK7(1+),Calponin(肌上皮+)。	术后外院放疗	2019-12-12
P		629464		9	G	1	60	35	5		2	100	50	1311853	姜淑苹	2	1	胸外科2	（6）（左主支气管肿物（缝线处为上）） 左主支气管腺样囊性癌，侵透支气管壁全层达外膜，可见神经侵犯，未见明确脉管瘤栓。（5）（下切缘）冰 （参见629336）、（8）（上切缘）冰 （参见629372）、（9）（上切缘2）冰 （参见629406）均可见癌累及。（7）（下切缘2）未见癌。 淋巴结未见转移性癌（3/18） （1）（下肺韧带旁淋巴结（9区）） 0/2 （2）（第4区淋巴结） 0/1 （3）（隆突下淋巴结（7区）） 3/13 （4）（主动脉窗淋巴结（5区）） 0/2	2016-05-05	2016-05-11 15:57:00	（1）炭黑结节数枚，直径1cm。（2）结节一枚，大小1×1×0.5cm。（3）结节数枚，直径0.5-2cm。（4）结节一枚，直径1cm。（6）部分支气管，长2.5cm，一侧附缝线，上切缘断端直径2cm，下切缘断端直径1.5cm。粘膜面见一灰白粗糙区，范围2×1.5cm，距上切缘0.4cm，距下切缘0.5cm。（7）部分支气管组织大小0.5×0.3×0.2cm。	左主支气管	2	气管支气管	6	1	有R1，LNM	1	1				2	1	无	2	1		无	0	0	无	未报		无		手术袖切气管保留肺叶，术后放疗	2017-2-8，陆续行内镜冷冻治疗和扩张
P卓	11.5，直径60微米n内侵，ki20%	630334	2号S和B成分多	2	C	2	5	60	20	15	2	100	64	1315139	张凤祥	1	2	桓兴医院	（1）（右乳改良根治标本） 乳腺腺样囊性癌，肿瘤最大径3.3cm，可见神经侵犯，未见明确脉管瘤栓。肿瘤侵及乳头下方组织，未累及表皮及胸肌筋膜，周围乳腺未见特殊。 腋窝淋巴结未见转移癌（0/19）。 免疫组化结果显示:AE1/AE3(2+),CK5&6(2+),Calponin(1+),EGFR(3+),ER(-),HER2(1+),Ki-67(+20-30%),P63(1+),PR(-)。	2016-05-06	2016-05-14 20:18:00	右乳癌改良根治标本，大小16×15×3cm，梭皮面积10.5×4cm，乳头及皮肤质略硬，书页状切开乳腺于乳头下方见一肿物，大小3.3×2×1.6cm，肿物切面灰白实性质硬，累及皮肤及乳头，距胸肌筋膜0.5cm，周围乳腺灰白灰黄质软。腋窝脂肪找到结节数枚，直径0.4-2cm。	右乳	2	乳腺	7	1	R0，术后随诊	0	1		1	3.3cm	2	1	无	0	0		无	0	0	无	未报		有	AE1/AE3(2+),CK5&6(2+),Calponin(1+),EGFR(3+),ER(-),HER2(1+),Ki-67(+20-30%),P63(1+),PR(-)。		2018-04-09
P0		631111		5	S	3	10	20	70		3	100	35	1314157	王志刚	1	1	胸外科2	（4）（右肺中下叶） 右肺腺样囊性癌，肿瘤最大直径4cm，肿瘤主要位于中间段支气管、累及中、下叶支气管分叉处及中、下叶叶、段支气管，侵透支气管壁外膜累及支气管壁周围脂肪组织及（1）（隆突下淋巴结（7区））周围脂肪组织[免疫组化结果:AE1/AE3(1+),CD117(-),CK5&6(-),P63(-)]，未累及肺组织及脏层胸膜，可见神经侵犯，未见明确脉管瘤栓。中、下叶周围肺组织内可见灶状炭沫沉积。(2)（中间段支气管切缘）冰（参见631022）可见癌浸润。 淋巴结转移性癌（1/21） 中叶肺外支气管旁淋巴结 0/3 中叶肺内支气管旁淋巴结 0/1 下叶肺外支气管旁淋巴结 0/3 下叶肺内支气管旁淋巴结 1/5 中、下叶支气管间淋巴结 0/2 （1）（隆突下淋巴结（7区）） 0/1 （3）（4R+2R淋巴结） 0/6 免疫组化结果:CD31,CD34,D2-40(显示脉管)。 pTNM分…	2016-05-12	2016-05-23 09:52:00	（4）右肺中下叶，大小17×9×4.5cm，叶间裂发育不完全，右肺中叶大小8×4×2.5cm，右肺下叶大小13×9×4.5cm，脏层胸膜光滑，上附闭合器，沿支气管剖开肺，中间段支气管见一肿物，大小4×3×3cm，肿物累及中下叶叶支气管，未累及脏层胸膜，紧邻中间段支气管切缘，多切面切开周围肺呈海绵样，肺内外找到结节数枚，直径0.7-1.5cm，（1）炭黑结节1枚，直径1.1cm。（3）炭黑结节数枚，直径0.7-1.1cm。	中间段支气管	2	气管支气管	6	1	有R1,LNM	1	1				2	1	无	1	1		无	0	0	无	未报		有	AE1/AE3(1+),CD117(-),CK5&6(-),P63 CD31,CD34,D2-40(显示脉管)。	AE1/AE3(1+),CD117(-),CK5&6(-),P63(-)]，未累及肺组织及脏层胸膜，可见神经侵犯，未见明确脉管瘤栓。中、下叶周围肺组织内可见灶状炭沫沉积。(2)（中间段支气管切缘）冰（参见631022）可见癌浸润。 淋巴结转移性癌（1/21） 中叶肺外支气管旁淋巴结 0/3	术前化疗，术后建议放疗，2016-5-23
P		634434	实性区需与基底鳞鉴别	6	GCSB	5	30	10	35	25	3	100	47	1319338	高伟	1	1	胸外科4	（11）（右肺下叶） 右肺下叶涎腺型癌，结合形态及科内讨论意见符合腺样囊性癌，部分区域分化较差呈实性巢状，伴坏死及多灶神经侵犯。肿瘤最大径3.5cm，累及脏层胸膜、叶段支气管和肺门大血管壁。支气管切缘未见癌。周围肺呈阻塞性肺炎改变。 淋巴结转移性癌（5/22） 肺内淋巴结 2/2 （1）（下肺静脉旁淋巴结） 2/3 （2）（隆突下淋巴结（7区）） 1/3 （3）（上叶支气管旁淋巴结）冰 0/1 （参见634343） （4）（上叶支气管旁淋巴结2）冰 0/1 （参见634344） （5）（中叶支气管旁淋巴结） 0/1 （6）（上叶支气管旁淋巴结3） 0/5 （7）（中间段支气管旁淋巴结） 0/1 （8）（下叶支气管旁淋巴结） 0/1 （9）（4R区淋巴结） 0/1 （10）（2R区淋巴结） 0/3 特殊染色结果显示:弹力纤维显示受累。 免疫组化结果显示: 6号组织块：AE1/AE3(2+)…	2016-05-27	2016-06-03 09:19:00	（11）肺叶切除标本，大小11×10×5.5cm，脏层胸膜局灶粗糙，距支气管断端1.5cm，见一灰白肿物大小3.5×2×2cm，切面灰白质硬界不清，与肺门血管关系密切，累及叶段支气管，紧邻肿物见一灰黄质韧区，范围5×4×3cm。周围肺灰红质软，肺内找到结节两枚，直径0.6-0.7cm。（1）结节数枚，直径0.6-0.7cm。（2）结节两枚，直径1.2-4.5cm。（5）结节一枚，直径0.8cm。（6）结节一枚，直径2cm。（7）结节一枚，直径1cm。（8）结节一枚，直径0.8cm。（9）结节一枚，直径2cm。（10）结节两枚，直径1.5-2cm。	叶段支气管	2	气管支气管	6	1	R0,LNM	0	1				2	1	血管壁侵犯	2	1		无	0	0	无	未报		有	AE1/AE3(2+),CK5&6(2+),P40(局灶3+),P63(局部3+),Napsin-A(-),TTF1(-),Syn(-),CgA(-),Ki-67(密集区50%)	术后因纵隔LNM行化疗，2016-11可疑复发后再行化疗	2017/5-11预后差电话妻15252824088和13775488555
P		635698		3	C	2	5	65	10	20	2	100	52	1319952	冯敏山	1	2	头颈外科2	（1）（右上颌窦）、（2）（右鼻侧壁及肿瘤）、（3）（筛窦及肿瘤） 右侧鼻腔腺样囊性癌。肿瘤累及右侧上颌窦及筛窦，（4）（右侧蝶窦）未见癌。	2016-06-02	2016-06-07 11:44:00	（1）囊壁组织一堆，大小3.5×2.5×1.0cm。囊内容物已流失，囊壁厚0.1-0.2cm，内壁光滑。（2）碎组织一堆，总大小8×6×2.5cm，切面灰白局部灰黄（3）碎组织一堆，大小4×3×1.5cm。（4）灰白碎组织一堆，总大小1.8×1.8×0.6cm，全埋。	右鼻腔，鼻窦	1	鼻腔鼻窦颅底	4	1	术中未侵犯鼻中隔-鼻底-鼻咽-上颌窦-蝶窦和骨质，切除鼻腔筛窦肿物，貌似干净	1	1				3	0	不确定	x	2		无	0	0	无	未报		无		术后放疗	2019-10-16
P0		637111		2	S	3	10	5	70	15	3	100	36	1323899	孙贤林	1	1	胸外科2	（1）（气管内肿物）冰及冰余 气管腺样囊性癌，实性型>50%，肿瘤侵透气管壁全层达外膜，可见神经侵犯，未见明确脉管瘤栓。（2）（气管下切缘）冰见癌浸润，（4）（气管上切缘）冰未见癌。 （3）（上纵隔淋巴结） 纤维脂肪组织中见少量淋巴细胞，未见癌。 （参见637111-637113） 免疫组化结果显示:AE1/AE3(3+),CK5&6(2+),Calponin(外层细胞+),P63(外层细胞+),Ki-67(30%+),CD117(2+),CD56(-),CgA(-),Syn(-),TTF1(-)。	2016-06-08	2016-06-18 10:45:00	炭黑结节一枚，直径0.3cm。	气管	2	气管支气管	6	1	有R1	1	1	只看冰冻号			3	1	无	x	2		无	0	0	无	未报		有	AE1/AE3(3+),CK5&6(2+),Calponin(外层细胞+),P63(外层细胞+),Ki-67(30%+),CD117(2+),CD56(-),CgA(-),Syn(-),TTF1(-)。		建议术后放疗，2016-11-30
P	形态特殊像PA	640698		1	B原5-5-10-80	4	15	15	20	50	2	100	66	1324111	董仲奇	1	2	胸外科2	（7）（左肺上叶） 肺叶段支气管腔内见恶性肿瘤浸润，呈巢状、条索状及腺样结构分布于粘液间质中，细胞异型明显，结合形态及目前的免疫组化结果，首先考虑为腺样囊性癌。肿瘤最大径2.1cm，未累及肺实质，未见明确脉管瘤栓及神经侵犯。周围支气管粘膜可见鳞状上皮重度不典型增生/原位癌。（8）（左主支气管切缘）、（9）（下叶支气管切缘2）及（10）（下叶支气管切缘1（缝线处））均未见癌。 （2）（上叶支气管切缘）冰 （参见640669） 支气管粘膜组织中局灶见鳞状上皮原位癌，可疑间质浸润。 淋巴结未见转移癌（0/33） 肺内淋巴结 0/2 肺外淋巴结 0/10 （1）（10区淋巴结） 0/5 （3）（上叶支气管旁淋巴结） 0/2 （4）（5区+6区淋巴结） 0/7 （5）（9区淋巴结） 0/2 （6）（7区淋巴结） 0/5 免疫组化结果显示:AE1/AE3(3+),CK19(1+),CK5&6(局灶+…	2016-06-27	2016-07-04 10:18:00	（7）肺叶切除标本，大小11.8×8.5×6.2cm，肺膜表面光滑，沿支气管剖开肺，肺门处叶段支气管腔内见一肿物，大小2.1×1.3×1.1cm，切面灰白实性质硬界不清，肿物主要位于叶段支气管腔内，未累及周围肺及上叶脏层胸膜，周围肺灰红质软，局部胸膜表面见多发肺大泡形成，直径1.5-2.3cm。肺内外见炭黑结节数枚，直径0.7-1.3cm，大者切面灰黑质中，周围肺灰褐实变，范围约6×5cm。（1）炭黑结节2枚，直径0.5-1.3cm。（3）炭黑结节1枚，直径0.6cm。（4）炭黑结节数枚，直径0.4-1.6cm。（5）炭黑结节2枚，直径0.6-0.8cm。（6）炭黑结节数枚，直径0.5-1.7cm。（8）支气管壁一段，直径1.9cm，宽0.4-0.6cm。（9）灰白软骨样组织，长0.3cm，宽0.2cm。（10）支气管壁，长2.2cm，宽0.7cm。	支气管	2	气管支气管	6	1	上叶支气管切缘可见原位癌	1	1		1	2.1cm	1	1	无	0	0		无	0	0	无	未报		有	AE1/AE3(3+),CK19(1+),CK5&6(局灶+),Calponin(-),Ki-67(60%),P40(-),P63(-),S100(2+),TTF1(-),CD117(2+)。		2018-03-01
P		644772		1	GCSB	5	10	40	20	30	2	100	35	1329236	商志军	1	1	头颈外科1	（1）（右侧上颌骨） 上颌窦腺样囊性癌，主要呈筛状型，部分呈实体型，可见神经侵犯，未见明确脉管瘤栓。肿瘤大小5×4×4cm，侵犯上颌骨、（2）（翼突）及（3）（眶骨膜）。（5）（框内侧壁切缘）冰、（7）（右侧鼻咽侧壁切缘）冰、（8）（鼻根部切缘）冰可见腺样囊性癌浸润。（4）（筛窦切缘）冰、（6）（翼突根部组织）冰、（9）（鼻翼旁切缘）冰、（10）（蝶窦粘膜）冰、（11）（右侧鼻咽侧壁切缘2）冰、（12）（鼻根部切缘2）冰、（13）（框内侧壁切缘2）冰 均未见癌。 pTNM分期：pT3（请结合临床） （参见644637、644634、644633、644609、644608、644606-644602）	2016-07-14	2016-07-25 08:55:00	（1）部分上颌骨及肿物切除标本，总大小7×6×3cm，附牙齿6颗，上颌窦内见一菜花样肿物，大小5×4×4cm，切面灰白粗颗粒状，质偏软，局灶可见出血及囊性变，未见明确坏死，与上颌骨关系不清。（2）灰红破碎组织一堆，总大小2×2×1cm，质硬。（3）灰红组织一粒，直径0.3cm。	右上颌窦	1	鼻腔鼻窦颅底	4	1	有R1	1	1		1	5cm	3	1	无	x	2	上颌骨	无	0	0	无	未报		无		术后放疗	2017-02-27
P赵大芬-卓	16；直径50微米两处神经，一处围，一处疑	656430		3	S	3		10	90		3	100	40	1340323	赵大芬	2	1	乳腺外科1	“左乳微创旋切术后” （1）（左乳单纯切除标本） 乳腺浸润性癌，结合形态及免疫组化结果符合腺样囊性癌。肿瘤大小1×1×0.8cm，未累及乳头、皮肤，邻近胸肌筋膜，胸肌筋膜及周围横纹肌组织内伴有炎细胞浸润，局灶可见神经侵犯，未见明确脉管瘤栓；癌旁伴有纤维组织增生及炎细胞浸润，符合术后改变。周围乳腺呈腺病改变。 淋巴结未见转移癌（0/9）。 （2）（前哨淋巴结1）冰 0/1（参见656290） （3）（前哨淋巴结2）冰 0/1（参见656291） （4）（前哨淋巴结3）冰 0/1（参见656292） （5）（前哨淋巴结4）冰 0/1（参见656293） （6）（前哨淋巴结5）冰 0/1（参见656294） （7）（前哨淋巴结6）冰 0/1（参见656296） （8）（前哨淋巴结7）冰 0/1（参见656297） （9）（前哨淋巴结8）冰 0/1（参见656298） （10）（前哨淋巴结9）冰…	2016-09-08	2016-09-18 10:25:00	左乳单纯切除标本，乳腺组织大小18×14×4cm，梭皮面积11×4cm，乳头未见明显异常，距乳头0.8cm，可见一陈旧性手术瘢痕，瘢痕下可见一皱缩区，其中有一缺损，缺损旁可见质硬肿物，大小0.8×1×1cm，切面灰白实性质硬，界尚清。紧邻胸肌筋膜，周围乳腺灰黄质软。	左乳	2	乳腺	7	1	外院局切后扩大单纯切，R0	0	1		1	1	1	1	无	0	0		无	0	0	无	未报		有	ER(-),PR(-),HER2(-),CD117(2+),P63(灶+),E-cadherin(1+),Ki-67(+35%)；肌上皮 CD10(-),calponin(-)。
P0改号	分化较好？核分裂低	660956		3	S	3	10	15	65	10	3	100	53	1345669	骆凤侠	2	2	头颈外科1	（1）（腮腺尾部肿物）冰及冰余（参见660956） 涎腺上皮性肿瘤，肿瘤大小3×2×2cm，浸润性生长，结合免疫组化结果，符合腺样囊性癌。 腮腺周围淋巴结未见转移癌（0/6）。 免疫组化结果: AE1/AE3(3+),CK5&6(2+),CK7(2+),Ki-67(+，20%),P63(3+),S100(2+)。 （2）（颌下清扫） 颌下腺组织，未见肿瘤。 备注：本例经2016-10-14科内会诊达成上述诊断意见。	2016-10-09	2016-10-14 10:43:00	涎腺组织大小3.5×3×2cm，切面未见明显结节及质硬区，周围少量脂肪组织内未见明显淋巴结。	腮腺	1	腮腺	1	1	术中见位于颌下腺和腮腺尾部之间，未单送切缘	0	1		1	3	2核实大小实质外	0	不确定	x	2		无	0	0	无	未报		有	AE1/AE3(3+),CK5&6(2+),CK7(2+),Ki-67(+，20%),P63(3+),S100(2+)。		2016-10-18
P		662822		4	GCSB	5	10	40	10	40	2	100	58	1347647	纪恩兴	1	2	头颈外科2	（1）（气管肿物） 腺样囊性癌，肿瘤累及气管软骨，侵达气管壁外的纤维脂肪组织。肿瘤累及气管壁周围切缘。	2016-10-17	2016-10-21 19:35:00	气管一段，长1.5cm-2.8cm，切缘直径2.5cm，气管壁内见一肿物，大小2.7×2.3×2cm，切面灰白实性，质硬，紧邻气管侧切缘，侵达气管壁外纤维脂肪组织。	气管	1	气管	6	1	气管切除5环张力大，无法保留足够切缘	1	1				3	1	不确定	x	2		无	0	0	无	未报		无		扩切，术后放疗	2018-10-10
P	贴近神经一侧	664823		4	C	2	10	70	10	10	2	100	55	1346067	刘文和	1	2	胸外科1	（4）（气管肿物） 气管腺样囊性癌，侵透气管壁全层达外膜，未见明确脉管瘤栓及神经侵犯。（6）（气管上切缘）冰及（7）（气管下切缘）冰（参见664764-664765）未见癌。 淋巴结未见转移癌（0/7） （1）（奇静脉弓上淋巴结） 0/2 （2）（气管旁淋巴结） 0/1 （3）（3A淋巴结） 0/1 （5）（7区淋巴结） 0/1 （8）（4R淋巴结） 0/2 免疫组化结果显示:CD117(2+),CD56(-),CK7(3+),Calponin(1+),CgA(-),P63(2+),Syn(-),Ki-67(+20%)。	2016-10-25	2016-11-01 20:03:00	（1）结节两枚，直径0.4-0.6cm。（2）结节一枚，直径0.8cm。（3）结节一枚，直径0.6cm。（4）气管一段，长2cm，多切面切开，于气管壁内见一肿物，大小2×1×2cm，切面灰白实性，质硬，界不清，累及部分气管粘膜。（5）结节一枚，直径0.6cm。（8）结节两枚，直径0.3-0.4cm。	气管	2	气管支气管	6	1	上下切阴性，但侵犯气管外壁	1	1				3	1	无	0	0		无	0	0	无	未报		有	:CD117(2+),CD56(-),CK7(3+),Calponin(1+),CgA(-),P63(2+),Syn(-),Ki-67(+20%)。	扩切	2017-02-17
R陈常梅		670684		8	GCSB	5	40	15	30	15	3	100	37	1018849	陈常梅	2	1	头颈外科1	2016年11-17复发手术 “筛窦癌外院术后” （5）（上颌窦组织）、（6）（面部软组织）、（7）（眶内肿物及部分眶底壁）、（8）（筛窦）、（9）（右部分上颌骨及右侧鼻侧壁） 以上组织中可见腺样囊性癌弥漫浸润，肿瘤侵及神经，可见脉管瘤栓及骨质受侵。 2012年2-2扩切病理号416406 （1）（内眦皮下组织）冰 （参见670593） 增生的纤维组织中见极少许异型细胞团，经连切后消失。（2）（眶下皮下组织）冰 （参见670594）、（3）（内眦瘢痕组织）冰 （参见670595）、（4）（面部皮下肿物）冰 （参见670602）内可见腺样囊性癌浸润。	2016-11-07	2016-11-28 14:53:00	（5）灰褐灰白破碎不整形组织一堆，大小2.7×3×0.5cm，切面灰白灰褐实性，触及少许骨质，直径1.0cm。（6）灰白不整形组织一块，大小1.7×0.2×0.3cm，质韧全埋。（7）灰白不整形组织一块，大小4×2.3×1.5cm，切面灰白实性质韧，似为肿物，另附游离骨质一块，大小1.2×0.6×0.6cm。（8）破碎骨质一堆，总大小4×0.6×0.5cm。（9）部分上颌骨及周围软组织切除标本，大小4.2×3×2.5cm，上颌骨表面见一灰白肿物，大小3×2.5×1cm，累及骨质。	筛窦，上颌窦	1	鼻腔鼻窦颅底	4	1	有	1	2	4.5年			4a	1	有	x	2	面部，眼眶，上颌骨	无	0	0	无	未报		无		溢泪2年余，2011-12-20右泪道外院活检，2012-2-2本院第一次手术，术后未治，2016-5右鼻堵留脓涕，11-3核磁复发	2019-09-16
P		675818		8	GCSB	5	40	10	10	40	2	100	61	1351398	周保连	2	2	胸外科2	（6）（气管肿物） 气管腺样囊性癌，侵透气管壁全层达外膜，可见神经侵犯。（4）（下切缘）冰 、（5）（上切缘）冰未见肿瘤。 淋巴结未见转移癌（0/19） （1）（10区淋巴结） 0/1 （2）（4R淋巴结） 0/4 （3）（4R+2R淋巴结） 0/7 （7）（7区淋巴结） 0/7	2016-12-18	2016-12-16 09:08:00	（1）炭黑结节一枚，直径0.5cm。（2）炭黑结节两枚，直径0.7-1.5×1×0.3cm。（3）炭黑结节数枚，直径0.9-大小2×1.7×0.5cm。（7）炭黑结节两枚，直径1.2-大小3×1×0.5cm。（6）部分气管组织，长1.7cm，切缘宽2cm及2.2cm，紧邻切缘，支气管腔内见一隆起型肿物，大小2.2×1.2×1.4cm，表面光滑。	气管	2	气管支气管	6	1	上下切阴性，但侵犯气管外壁	1	1				3	1	不确定	0	0		无	0	0	无	未报		无			2017-6-10随诊
P		681042		4	C	2	10	80	10		2	100	39	1361481	李小排	2	1	胸外科2	（10）（右肺中下叶）、（11）（右肺上叶） 肺腺样囊性癌，肿瘤大小4.8×4×2cm，主要位于右肺下叶根部，累及右主支气管、中间段支气管、下叶叶段支气管及中叶叶支气管，未累及脏层胸膜、上叶支气管开口及上叶叶段支气管。可见神经侵犯，未见明确脉管瘤栓。右肺上、中、下叶周围肺均呈轻度肺气肿改变。 （8）（右主支气管切缘2） 及（9）（右主支气管切缘3）均未见癌。 （6）（右主支气管切缘（缝线处））冰 （参见680995） 支气管壁内见腺样囊性癌浸润，冰冻组织石蜡连切片癌组织消失。 淋巴结转移性癌（4/27），未累及淋巴结被膜外。 右肺下叶肺外淋巴结 1/2 右肺下叶肺内淋巴结 2/2 右肺上叶肺内淋巴结 0/3 右肺上叶肺外淋巴结 0/2 （1）（9区淋巴结） 0/1 （2）（肺门淋巴结（10区）） 0/3 （3）（隆突下淋巴结（7区）） 0/3 （4）（中叶支气管旁淋巴结（11区）） 1/…	2016-12-30	2017-01-09 11:22:00	（10）右肺中下叶袖状切除标本，中叶大小8×6×3.5cm，下叶大小13.5×8×3cm，叶间裂发育完全，沿支气管剖开肺，于下叶肺根部见一肿物，大小4.8×4×2cm，切面灰白半透明质中，累及中间段支气管、下叶叶段支气管及中叶叶支气管，未累及上叶支气管开口，周围肺灰红质软。下叶肺外找到结节1枚，直径1.5cm。（11）肺叶切除标本，大小13×9×3cm，沿支气管剖开肺，叶段支气管粘膜光滑，多切面切开肺组织灰红质软，未见明确肿物及质韧区，肺内外找到结节数枚，直径0.5-0.8cm。（1）结节数枚，直径均为1cm。（2）结节数枚，直径0.3-0.5cm。（3）结节数枚，直径0.5-大小3×1.2×0.6cm。（4）结节2枚，直径1-1.5cm。（5）结节2枚，直径1.5-2.5cm。（7）结节数枚，直径0.8-2cm。（8）气管壁组织一段，长1.5cm，宽0.3cm，（9）气管壁一段，长3c…	叶段支气管	2	气管支气管	6	1	有R1,LNM	1	1				3	1	无	1	1		无	0	0	无	未报		有	CD117(1+),CK7(腺上皮+),Calponin(肌上皮+),Ki-67(+10%),P63(肌上皮+)。	术后化疗	2017-10-19
P		681169		10	SG	5	40	10	50		3	100	54	1362339	陈英	2	2	胸外科1	（6）（部分气管下段及肿物） 气管腺样囊性癌，侵透气管壁全层，大小2×2×0.8cm，可见神经侵犯，未见明确脉管内癌栓。肿瘤侵及气管切缘。 （8）（右肺上叶楔形切除标本）、（7）（右肺上叶结节）冰 （参见681040） 腺癌，高分化，最大径0.4cm（参见冰冻片，石蜡切片病变减少），未累及脏层胸膜。肺切缘净。 （2）（皮肤痣） 皮内痔，各侧切缘及基底切缘已切净。 （1）（舌骨） 骨组织。 淋巴结未见转移性癌（0/7） （3）（7区淋巴结） 0/2 （4）（4R+2R区淋巴结） 0/4 （5）（左气管食管沟淋巴结） 0/1	2016-12-30	2017-01-09 15:01:00	(1)舌骨大小5×1.5×1cm，肉眼未见明显病变。 (2)皮肤组织一条，大小6×1×0.5cm，皮肤中央略隆起，大小0.5×0.4×0.2cm，灰白质稍韧，局限于皮内。(3)灰黑结节两块，小者大小1×1×0.3cm，大者大小2×1×0.3cm。 (4)结节数枚，直径0.4-0.8cm。 (5)灰红组织一粒，直径0.2cm。(6)气管一段，长3.5cm，管径2cm，气管腔内一侧见偏心性增厚，大小2×2×0.8cm，灰白质细界不清，距一侧切缘最近0.3cm。(8)部分肺组织，大小2×7×1cm，周围见闭合器，一侧见断面，多切面切开，肺组织灰红质软，未见明确肿物。	气管	2	气管支气管	6	1	扩切，有RI	1	1				3	1	无	0	0		无	0	0	无	未报	右肺上叶高分化腺癌0.4cm	无		术后放疗	2019-01-07
R-冯照花一次病例		683580		9	C	2	30	60	10		2	100	53	1057077	冯照花	2	2	头颈外科1	“喉部腺样囊性癌术后” （11）（全喉）、（2）（喉内肿物）冰 （参见683279）、（13）（舌根切缘2）冰 （参见683345） 残喉组织中仍可见腺样囊性癌浸润。肿瘤侵犯双侧声门旁间隙，并累及甲状软骨及双侧杓状软骨，直接侵犯颈前横纹肌及皮下组织；累及舌根周围软组织。舌根切缘2、下切缘均未见癌。 （1）（左颌下淋巴结）冰（参见683275） 纤维脂肪组织中见腺样囊性癌浸润，未见淋巴结结构。周边见少许横纹肌组织。 （12）（舌根切缘）冰 （参见683333） 被覆鳞状上皮的粘膜组织边缘见少许癌组织浸润。 淋巴结转移性癌（5/54） 颈前淋巴结 0/1 （3）（左颈2a区淋巴结） 3/10 周围见癌结节，累及周围横纹肌及皮下组织。另见少许涎腺，未见肿瘤侵犯。 （4）（左颈2b区淋巴结） 0/2 （5）（左颈3区淋巴结） 0/8 （6）（左颈4区淋巴结） 0/4 （7）（右颈2a区淋巴结） …	2017-01-11	2017-01-18 18:39:00	（11）残喉切除标本，大小7×6×2cm，未见会厌软骨。上缘可见大量闭合器，双侧声门结构欠清，附气管一段，长5cm，气管表面可见气管切开开口。喉内见灰白色半透明质硬区，范围2.5×2×2.2cm，与周围界限不清，累及上端粘膜下组织。上端粘膜下组织增厚质硬，范围3×2×1cm，切面灰黄，似为肿瘤侵犯。（3）脂肪一堆，结节数枚，直径0.4-1.5cm，另触及一灰黄界限不清的质硬区，大小2.5×1.5×1.2cm。（4）脂肪一堆，结节两枚，直径0.3-0.4cm。（5）脂肪一堆，结节数枚，直径0.3-0.4cm。（6）脂肪一堆，结节数枚，直径0.3-0.5cm。（7）脂肪一堆，结节多枚，直径0.4-1.8cm。（8）脂肪一堆，结节两枚，直径0.6-0.8cm。（9）脂肪一堆，结节多枚，直径0.3-0.8cm。（10）脂肪一堆，结节数枚，直径0.3-0.6cm。	会厌喉面	1	喉	12	1		1	2	3年			4a	1	不确定	3核实淋巴结被膜受累？	1		无	0	0	无	未报		无		声嘶一年余，2012-9-5第一次水平部分喉手术，2016年初左右开始出现进行呼吸困难，2016-12-27核磁复发	2019-03-27
P	形态特殊像PA，有瘤栓,实性50无PNI而TRK1	684583	癌旁上皮伴鳞状原位癌	2	SB	5		5	55	40	3	100	53	1366571	张晓玲	2	2	妇科3	“补充病史：子宫肌瘤外院子宫次全切除术后” （11）（残存广泛宫颈标本）、（12）（左宫旁组织） 宫颈分化差的癌，肿瘤大2×1.6×0.7cm，伴黏液样间质，可见脉管瘤栓，累及宫颈间质0.7cm(宫颈全层厚约1.4cm)，结合肿瘤组织形态及免疫组化结果，考虑为腺样囊性癌,癌旁宫颈HSIL（CIN3）部分累腺。未见明确神经侵犯，未累及宫旁组织，残存宫颈断端及阴道断端均未见癌。 （1）（左附件及左圆韧带残端） 左卵管及左卵巢组织，另见纤维结缔组织，未见癌。 （2）（右附件及右圆韧带残端） 右卵管及右卵巢组织，另见纤维结缔组织，未见癌。 淋巴结未见转移癌（0/29） （3）（右腹股沟深淋巴结） 0/3 （4）（右髂外淋巴结） 0/3 （5）（右闭孔淋巴结及右髂内淋巴结）0/4 （6）（右髂总淋巴结） 0/1 （7）（左腹股沟深淋巴结） 0/5 （8）（左髂外淋巴结） 0/4 （9）（右闭孔淋巴…	2017-01-16	2017-01-25 10:01:00	（11）宫颈组织，长3cm，切缘宽6cm，下附阴道，长1-3.3cm，切缘宽11cm，于宫颈约6-12点处见一溃疡型肿物，大小2×1.6×0.7cm，切面灰红灰白质略韧界不清，肿物侵及宫颈壁大于二分之一，未累及阴道穹窿。（1）灰红组织一块，大小5×4×2.5cm，左附件结构不清，疑似输卵管一段，长2cm，直径0.3-0.5cm，疑似卵巢组织，大小3×2×1cm。（2）右卵管长6cm，直径0.5cm，伞开，右卵巢大小3×2×1cm，灰白灰红质韧。（3）结节一枚，大小2×2×0.4cm。（4）结节数枚，大小0.6×0.4×0.2-0.8×0.6×0.3cm。（5）结节数枚，直径0.4-大小2×1×0.4cm。（6）结节一枚，大小1×0.6×0.4cm。（7）结节数枚，大小均1×0.6×0.4cm。（8）结节数枚，直径0.3-大小1.2×0.4×0.3cm。（9）结节数枚，大小0.4×0.3×…	宫颈	2	宫颈	15	1	R0,ki-67-70%	0	1				1b	0	有	0	0		无	0	0	无	未报		有	P16(3+),CK18(2+),EMA(2+),BCL2(3+),NSE(2+),CD117(+),CD56(2+),Ki-67(+，70%),CD10(-),CK7(-),CgA(-),Syn(-),TTF1(-),CK34βE12(-),CK5&6(-),P40(-),P63(-),Calponin(-),SMA(-)。	术后放化疗	2017-07-19
P		686090		2	SB原15-5-40-40	5	30	10	30	30	3	100	48	1369001	刘素英	2	1	头颈外科2	“外院鼻咽肿物活检术后” （1）（鼻咽病灶） 鼻咽腺样囊性癌，肿瘤镜下最大径1.6cm，小灶侵及横纹肌组织。（2）（左侧切缘）及（3）（下切缘）均未见癌。 pTNM分期：pT1（请结合临床所见）	2017-01-22	2017-01-26 09:59:00	（1）灰褐不整形组织，大小4×3×1.5cm，局灶附粘膜，切面灰粉实性质中。（2）灰褐组织一块，大小1×1×0.3cm。（3）灰褐组织一块，大小1.2×0.6×0.3cm。	鼻咽	1	鼻腔鼻窦颅底	4	2	鼻咽肿物扩大切，送检切缘阴性，切片距离烧灼缘<1mm	1	1				1	0	不确定	x	2		无	0	0	无	未报		无		术后因呼吸困难如ICU一天，术后放疗	2017-10-16
P		694556		8	S	3	10	30	50	10	3	100	55	1374986	万秀红	2	2	头颈外科1	（1）（左上颌骨及肿瘤） 上颌窦腺样囊性癌，呈筛状型及实体型，可见神经侵犯，未见明确脉管瘤栓。肿瘤大小4×4×2.5cm，侵犯上颌骨骨质、硬腭及牙龈组织，紧邻左侧牙龈切缘、磨牙后牙龈切缘、硬腭后切缘、硬腭中线切缘，未累及牙龈前侧切缘、硬腭前切缘，（2）（筛窦）、（3）（碟窦）未见癌。 免疫组化结果显示:CD117(2+),CK7(3+),Calponin(1+),P63(1+)。	2017-03-09	2017-03-17 14:50:00	（1）左上颌骨切除标本，于左上颌窦内见一灰黄灰白肿物，质中，略呈胶冻样，大小4×4×2.5cm，另见牙齿7颗，第八颗磨牙疑似缺损，于第六颗至磨牙后牙龈肿胀，粘膜尚光滑。（2）灰褐不整形组织一堆，总大小2×1×0.8cm。（3）灰白组织一块，大小0.8×0.4×0.2cm。	上颌窦	1	鼻腔鼻窦颅底	4	1	紧邻切缘	1	1				2	1	无	x	2	上颌骨，硬腭	无	0	0	无	未报		有		术后放疗	2017-06-14
P		699978		5	GCSB	5	10	40	10	40	2	100	50	1380260	谭磊	2	1		（6）（舌口底下颌骨切除） 口底腺样囊性癌。肿瘤最大径6.0cm，侵犯周围横纹肌组织及脂肪组织，未累及下颌骨，可见神经侵犯，未见明确脉管瘤栓。（3）（下齿槽神经断端）冰 、（4）（舌神经断端）冰 未见癌。（参见699627、699629）） （7）（下颌骨内侧神经组织）冰 （参见699709） 神经组织中见癌组织浸润，符合腺样囊性癌。。 淋巴结未见转移性癌（0/5）。 （1）（面前淋巴结1）冰 0/1 （参见699585） （2）（面前淋巴结2）冰 0/1 （参见699586） （5）（左颈2区淋巴结） 0/3 pTNM分期：pT3N0（请结合临床）	2017-03-30	2017-04-08 12:02:00	（6）不整形软组织一块，大小6×5×2.5cm，局灶似有包膜，切面灰白质韧，部分略呈胶冻样，附部分下颌骨，大小4.5×4×2.5cm，内侧附粘膜及软组织，未见明确肿物。（5）结节数枚，直径0.5-1cm。	口底	1	口腔小涎腺比舌下腺靠外	2	1	累及颌下腺，距边缘<1mm	1	1				4	1	无	0	0		无	0	0	无	未报		无		术后外院放疗3次因伤口未愈感染中断，2018-7舌根复发，2018-10-10复发灶切除基底有癌	2019-12-09
Re-0	实性90无PNI而TRK1	700733		5	S	3	10		90		3	100	45	1382110	陈超	1	1	头颈外科1	“左上腭腺样囊性癌术后” （3）（左眶内侧壁肿物）、（4）（右侧额窦肿物）、（5）（左筛窦前颅底复发肿物）、（1）（钛板周围组织）冰及冰余（参见700612）、（2）（左颞下窝组织）冰及冰余（参见700614） 左筛窦前颅底腺样囊性癌，结合病史，符合术后复发。肿瘤累及左眶内侧壁及右侧额窦；未累及左筛窦前颅底内游离骨质、钛板周围组织及左颞下窝组织。	2017-04-05	2017-04-11 11:27:00	（3）灰红灰白组织一块，大小2×2×0.8cm，质硬全埋。（4）灰褐结节一枚，直径1.5cm，质硬全埋。（5）灰白灰褐肿物，大小4×3.5×2cm，质硬粗颗粒感。并见游离骨及软骨组织一块，大小3.5×3.5×1.5cm。另见游离金属支架一块。	左上腭，鼻窦	1	口腔（上腭）	5	1	复发累及筛窦额窦近眶尖，广泛	1	2				4	0	有	x	2	眼眶，鼻腔鼻窦	无	0	0	无	未报		无		2016-4外院上腭术后放疗	2017-04-12
P卓	3，ki5%	706368		2	GCSB	5	40	40	10	10	2	100	50	1391175	王晓燕	2	1	乳腺外科1	（1）（左乳癌扩切标本） 乳腺浸润性癌，结合免疫组化染色，符合腺样囊性癌，肿瘤大小1.5×1×1cm，未见明确脉管瘤栓及神经侵犯；周围乳腺组织呈腺病改变，皮肤及侧切缘、（冰7）（内切缘）（参见706161）、（冰8）（外切缘）（参见706163）、（冰9）（下切缘）（参见706164）及（冰10）（上切缘）（参见706165）均未见癌。 淋巴结未见转移癌（0/6） （冰1）（前哨淋巴结1） 0/1（参见706145） （冰2）（前哨淋巴结2） 0/1（参见706146） （冰3）（前哨淋巴结3） 0/1（参见706147） （冰4）（前哨淋巴结4） 0/1（参见706148） （冰5）（前哨淋巴结5） 0/1（参见706149） （冰6）（前哨淋巴结6） 0/1（参见706150） pTNM分期：pT1cN0 免疫组化结果显示：HER2(-)，ER(+<5%，中阳)，PR(-)，AR(+…	2017-04-27	2017-05-08 19:44:00	（1）梭皮及乳腺组织，梭皮大小9×1cm，乳腺组织大小6×4×3.5cm，切面乳腺内见灰白肿物，大小1.5×1×1cm，肉眼距基底切缘最近0.3cm，距皮肤最近2.5cm。	左乳	2	乳腺	7	1	R0	0	1		1	1.5	1	0	无	0	0		无	0	0	无	未报		有		建议术后放疗	2019-04-16
Re-0		711604		1	S	3	10	10	80		3	100	54	1392769	梁运芝	2	2	头颈外科1	“右颌下腺样囊性癌外院术后” （冰1）（右口底肿物） 结合病史，形态符合腺样囊性癌，可见神经侵犯，未见明确脉管瘤栓。累及周围横纹肌组织。局部累及切除组织边缘。	2017-05-18	2017-05-23 15:33:00	（冰1）灰红不整形组织一块，大小2.8×2×1.8cm，切面灰白质中偏韧。	右颌下腺，右口底	1	颌下腺	3	1	有R1，复发扩大切	1	2				3	1	无	x	2		无	0	0	无	未报		无		4年前手术后化疗,复发术后建议放疗	2017-06-26
Re		711803		7	C	2	5	90	5		2	100	34	1315077	刘卫平	2	1	头颈外科2	“舌根腺样囊性癌术后1年” （4）（大部分舌及舌根）（冰6）（扁桃体切缘）（冰7）（舌根后切缘）（冰8）（舌背切缘）（冰9）（右前口底切缘）（冰10）（基底后切缘）（冰11）（基底前切缘）（参见711432、711437-711441） 舌组织中仍可见腺样囊性癌浸润；另见散在分布的异物（缝线）及异物巨细胞反应，结合病史，符合复发。肿瘤大小2.0×1.5×0.3cm，累及横纹肌。扁桃体切缘、舌根后切缘、舌背切缘、右前口底切缘、基底后切缘及基底前切缘均未见癌。 淋巴结未见转移癌（0/8） （冰1）（颏下淋巴结1） 0/1（参见711406） （冰2）（颏下淋巴结2） 0/1（参见711407） （冰3）（颌下淋巴结1） 0/1（参见711408） （冰4）（颌下淋巴结2） 0/1（参见711409） （冰5）（颌下淋巴结3） 0/1（参见711410） （1）（颏下淋巴结清扫） 0 纤维血管…	2017-05-18	2017-05-24 11:51:00	（1）脂肪组织一块，大小1.5×0.5×0.5cm，未触及明确结节，全埋。（2）脂肪一堆，结节一枚，直径0.5cm，另见涎腺组织，大小3.5×3×2cm，多切面切开，切面灰黄分叶状，未见明确灰白肿物及质硬区。（3）脂肪一堆，结节2枚，直径1.2-2cm。（4）部分舌切除标本，大小7×6×3cm，距舌根切缘1.5cm，舌背部局灶粘膜粗糙，范围1×1cm，粗糙粘膜下见一灰白质稍韧区，大小2×1.5×0.3cm，界不清，质中，累及舌肌。	舌根	1	舌根小涎腺	2	1	复发切除，送切缘干净	0	2	1年			1	0	无	0	0		无	0	0	无	未报		无		2016-5-16外院舌根手术R1，复发术后行放疗	2019-07-06
P		714087		3	G	1	50	10	20	20	2	100	48	1390145	陈保伏	1	1	头颈外科1	（冰1）（腭部肿物） 涎腺来源的肿瘤，肿瘤细胞具有双层上皮分化，呈小管状、条索状及局灶筛状结构，冰余制片显示肿瘤基底不规则，边界欠清，可见神经侵犯。结合免疫组化结果，符合腺样囊性癌，以管状型为主。肿瘤侵犯腭部粘膜伴溃疡形成，未见明确脉管瘤栓。肿瘤紧邻局灶基底切缘（相距<1mm）。 免疫组化结果显示：CK7(腔面上皮+)，CK5/6(2+)，Calponin(肌上皮+)，P63(肌上皮+)，Laminin(1+)，S-100(灶状+)，Ki-67(20%+)。	2017-05-26	2017-06-06 18:57:00	（冰1）灰红组织，大小3.5×2.5×1cm，一侧为粘膜面，粘膜面粗糙，局部隆起，面积2.5×2，取部分隆起区冰冻。	腭部	1	口腔（上腭）	5	1	基底<1mm	1	1				核实浸润深度等	1	不确定	x	2		无	0	0	无	未报		有	K7(腔面上皮+)，CK5/6(2+)，Calponin(肌上皮+)，P63(肌上皮+)，Laminin(1+)，S-100(灶状+)，Ki-67(20%+)。	术后放疗	2019-03-08
P		715308	5号B成分多	5	S	3		10	60	30	3	100	30	1397962	李秋平	1	1	胸外科2	（4）（右肺中下叶） 结合形态及免疫组化，符合肺腺样囊性癌，肿瘤位于支气管腔内并侵及周围肺，大小5.6×2.7×1.5cm，可见脉管瘤栓，未见明确神经侵犯，未累及脏层胸膜。支气管切缘未见癌。下叶周围肺呈轻度肺气肿改变，中叶周围肺间质纤维化。 淋巴结未见转移性癌（0/18） （1）（9区淋巴结） 0/2 （2）（7区淋巴结） 0/4 （3）（4R区淋巴结） 0/6 中间段支气管旁淋巴结 0/2 下叶肺外淋巴结 0/1 下叶肺内淋巴结 0/1 中叶肺外淋巴结 0/2 pTNM：pT2bN0 免疫组化结果显示：AE1/AE3(3+)，SMA(-)，P63(肌上皮+)，CK5/6(肌上皮+)，CK 34βE12(3+)，Syno(-)，ChrA(-)，Ki-67(+,40%阳)。	2017-06-02	2017-06-12 13:40:00	（1）炭黑结节两枚，直径0.4-0.6cm。（2）炭黑结节，直径2.7×1.5×0.6cm。（3）炭黑结节数枚，直径0.4-0.8cm。（4）右肺中下叶切除标本，下叶大小13×11×5cm，中叶大小10×6×3cm，中间段支气管直径2cm，长1.2cm，距中间段支气管切缘0.7cm，支气管腔内可见一结节状隆起型肿物，肿物大小5.6×2.7×1.5cm，切面灰白质硬韧，主要位于下叶叶支气管腔内累及中间段支气管及下叶段支气管，并累及中叶叶段支气管管壁。多切面切开周围肺下叶及中叶肺组织灰红质软，局灶可见扩张支气管。肺内外找到结节数枚，直径0.3-0.7cm。	支气管	2	气管支气管	6	1	R0，LN阴性	0	1		1	5.6		1	不确定	0	0		无	0	0	无	未报		有	免疫组化结果显示：AE1/AE3(3+)，SMA(-)，P63(肌上皮+)，CK5/6(肌上皮+)，CK 34βE12(3+)，Syno(-)，ChrA(-)，Ki-67(+,40%阳)。		2019-08-21
Re-0		716648		3	C	2		100			2	100	56	1396228	王玉贤	2	2	头颈外科2	17-06631（“左侧口底舌下肿物”） 涎腺腺样囊性癌（筛状型）； 送检切片未显示边缘与正常组织的切缘情况。“左舌下腺腺样囊性癌术后” （1）（左口底肿瘤） 腺样囊性癌，肿瘤大小5×2.3×2cm，可见神经侵犯，未见明确脉管瘤栓。肿瘤累及小涎腺及周围纤维脂肪组织，未累及鳞状上皮粘膜及周围横纹肌组织。（冰1）（舌神经切缘）（参见716580）、（冰2）（舌下神经切缘）（参见716581）、（冰3）（后基底切缘）（参见716582）、（冰4）（前基底切缘）（参见716583）、（冰5）（前切缘）（参见716584）、（冰6）（后切缘）（参见716585）未见癌。 淋巴结未见转移癌（0/17）。 （2）（左颈2区淋巴结） 0/6 （3）（左颈3区淋巴结） 0/11	2017-06-08	2017-06-14 07:09:00	（1）灰褐不整形组织，大小5.5×3×2.5cm，切面见一灰粉结节状肿物，大小5×2.3×2cm，质偏细界欠清。（2）结节数枚，直径0.3-0.8cm。（3）结节数枚，直径0.2-0.8cm。	左舌下腺	1	舌下腺	2	1	送检无，但肿瘤5cm，距烧灼缘<1mm	1	2	1年				1	无	0	0		无	0	0	无	未报	肺早癌可能	无		15个月前外院左舌下肿物切除，术后建议放疗	2017-06-28
P0		716763		5	SC	5		50	50		3	100	58	1395903	张福万	1	2	神外组1	（1）（左颞部肿物） 耳部皮肤真皮及皮下见腺样囊性癌组织浸润，少部分区域呈实体型结构，伴多灶性坏死。肿瘤累及软骨及骨质，并侵犯脑膜。 （冰1）（左颞肌切缘）（参见716579） 纤维脂肪及横纹肌组织。横纹肌组织边缘见少许异型腺体浸润，形态与主体肿瘤相似（716763），符合癌组织浸润。 免疫组化结果显示：AE1/AE3(3+)，CK5/6(-)，P63(-)，P40(-)，CD117(1+)，S-100(1+)，Calponin(-)，SMA(-)。	2017-06-08	2017-06-17 16:29:00	（1）破碎不整形组织一堆，总大小10.5×4.5×1.5-4.5cm，一侧可见耳朵，切面于外耳道下软组织见一灰白肿物，大小4×3×1.5cm，切面灰白，似累及外耳道软骨，另见膜样物一片，大小4.5×2.5×1.5cm，一侧附灰白肿瘤组织，一侧光滑。另见破碎游离骨组织，骨组织表面糟脆，被肿瘤侵犯。	左颞部	1	中颅底（颞骨岩部）	20	1	有	1	1					1	不确定	x	2	脑膜	无	0	0	无	未报		有	AE1/AE3(3+)，CK5/6(-)，P63(-)，P40(-)，CD117(1+)，S-100(1+)，Calponin(-)，SMA(-)。	半年前左颞皮下隆起，术前1月前左面瘫	2017-06-28
P		723871		3	S	3	10		90		3	100	64	1394463	朱满华	2	2	头颈外科1	17-06649（右耳前壁） 涎腺型上皮癌，结合免疫组化首先提示腺样囊性癌。 主要免疫组化：P63(+),CK(+),S-100(-),P53(-),Ki-67(约40%+)。 本院免疫组化结果显示:CK5&6(3+),Laminin(灶+),P40(2+),SMA(1+),CK18(3+),CD117(1+)。 特殊染色结果显示:粘卡(±)。 “右耳腺样囊性癌术后” （1）（右侧骨性外耳道前下壁）、（2）（中耳）、（3）（外耳道肿物）、（4）（右下颌骨颏突） 外耳道腺样囊性癌，累及皮肤、软骨、（右侧骨性外耳道前下壁），伴神经侵犯，未见明确脉管瘤栓。（右下颌骨颏突）、（中耳）、外耳道切缘及基底切缘未见癌。 免疫组化：AE1/AE3(3+)，CK7(3+)，CK5/6(2+)，Calponin(1+)，P63(2+)，SMA(1+)，Laminin(-)，S-100(1+)，Ki-67(+…	2017-07-05	2017-07-19 17:27:00	（1）破碎质硬组织一堆，大小3×2×0.5cm。（2）破碎质硬组织一堆，总直径0.8cm。（3）部分外耳道及周围软组织，总大小3.5×3×2.5cm，近下端局灶皮肤表面糜烂，直径0.4cm，切面其下方组织灰白色，质硬韧，界限不清，大小约1.5×1×0.5cm，似侵犯软骨，距软组织最近切缘2cm。（4）骨组织两块，总大小2.5×2×1.5cm。	右外耳道	1	外耳道	9	1	扩切不保证	1	1					1	无	x	2	皮肤	无	0	0	无	未报		有	CK5&6(3+),Laminin(灶+),P40(2+),SMA(1+),CK18(3+),CD117(1+)。	7年前右耳出现症状	2019-07-18
Re		724756		3	C	2		90	10		2	100	28	1357458	王宇鹏	1	1	头颈外科1	（B超送检穿刺-右腮腺术区） 细胞形态考虑为腺样囊性癌。 734809“右腮腺腺样囊性癌术后” （1）（右腮腺术区肿物） 增生的纤维组织及少许导管上皮组织，伴炎细胞浸润，未见明确恶性证据“右腮腺腺样囊性癌术后” （1）（右腮腺复发肿物） 腮腺腺样囊性癌。肿瘤最大径3.5cm，呈多结节状浸润涎腺周围纤维脂肪组织，局部可见围神经生长。 rpTNM分期：rpT3（请结合临床）	2017-07-10	2017-07-15 14:20:00	（1）灰褐不整形组织，大小3.5×2.5×2cm，切面呈灰黄质中结节状。	右腮腺	1	腮腺	1	1	复发肿物包绕面神经完整切除,延伸至烧灼缘	1	2					1	不确定	x	2		无	0	0	无	未报		有		2016/1/8外院术后	2019-09-20
P	形态特殊	725547		5	BS原0-0-20-80	5			50	50	3	100	71	1406082	吴金芳	2	2	头颈外科2	745982 （1）（活检-硬腭？） 涎腺源性恶性肿瘤，结合病史及形态，首先考虑为腺样囊性癌。（1）（部分右侧上颌骨） 硬腭涎腺源性恶性肿瘤，结合形态及免疫组化结果，首先考虑为腺样囊性癌。肿瘤形态不典型，浸润性生长，累及神经及上颌骨，粘膜切缘净。 免疫组化结果显示：AE1/AE3(局灶2+)，CD10(3+)，CD117(2+)，CK7(局灶2+)，SMA(-)，S-100(2+)，Ki-67(密集区域约40%+)，P63(-)。	2017-07-12	2017-09-06 10:42:00	（1）部分上颌骨、牙龈粘膜及硬腭切除标本，大小5×4×2cm，上附6颗牙齿，内侧硬腭粘膜面积5×3.5cm，粘膜中央见一隆起型肿物，大小2.7×2×1.5cm，切面灰白实性质硬界不清。肿物局灶似侵犯骨质。另见破碎骨组织一堆，大小5×3.5×1cm，未见明确肿物。其中含牙齿1颗。	硬腭	1	口腔（上腭）	5	1	R0还算局限，粘膜切缘净，累及骨质	0	1					1	不确定	x	2	上颌骨	无	0	0	无	未报		无		半年前起病，3个月前活检切除，本次算扩切更合适	2017-10-09
P		725998		6	GCSB	5	20	30	30	20	3	100	39	1405968	孙继兵	1	1	头颈外科2	（1723465）（喉部(活检3块)） 腺样囊性癌。 （2）（部分喉） 会厌根部腺样囊性癌，肿瘤最大径2.5cm，可见神经侵犯，肿瘤侵及会厌全层，累及会厌前间隙，未累及甲状软骨、横纹肌组织及（1）（右侧部分声室带）。（冰5）（右咽侧壁切缘）、（冰6）（左咽侧壁切缘）、（冰7）（会厌骨切缘）、（冰8）（右室带切缘）及（冰9）（左室带切缘）（参见725808-812）未见肿瘤。 淋巴结未见转移癌（0/4） （冰1）（左上颈淋巴结1）0/1（参见725757） （冰2）（左上颈淋巴结2）0/1（参见725758） （冰3）（右颈淋巴结1） 0/1（参见725760） （冰4）（右颈淋巴结2） 0/1（参见725761） pTNM分期：pT3N0	2017-07-13	2017-07-19 10:48:00	（1）片状不整形粘膜组织，形状不规则，未见明确粘膜样区。（2）部分喉，会厌大小6×3×1.0cm，未见明确声门区，会厌下部及右侧部分为主，左侧部分缺失，于会厌粘膜下可见灰白肿物，大小2.5×1.5×1cm，肿瘤切面灰白质细腻，侵透会厌软骨，局灶区紧邻甲状软骨骨膜。	会厌	1	喉	12	2	送检切缘阴性，累及会厌前间隙距离边缘<1mm	1	1		1	2.5		1	不确定	0	0		无	0	0	无	未报		无			2019-07-03
P		731979		3	GC	5	50	50			1	100	41	1409947	刘萍	2	1	头颈外科2	（冰1）（右颌下腺及肿物） 形态符合涎腺腺样囊性癌，肿瘤大小2×1.5×1cm，累及涎腺周围纤维组织，可见多灶神经侵犯，未见明确脉管瘤栓。 周围淋巴结未见转移癌（0/2）。 （冰1）（右颌下腺及肿物）（参见731979） 形态符合涎腺腺样囊性癌，肿瘤大小2×1.5×1cm，累及涎腺周围纤维组织，可见多灶神经侵犯，未见明确脉管瘤栓。 淋巴结未见转移性癌（0/10） （冰1）（右颌下腺及肿物）周围淋巴结 0/2 （1）（右颈2区淋巴结） 0/8 pTNM:T1N0 17-09581（右侧颌下腺肿物穿刺）少许涎腺源性肿瘤，首先应除外腺样囊性癌。	2017-08-09	2017-08-15 10:39:00	（1）结节数枚，直径0.5-0.8cm。	右颌下腺	1	颌下腺	3	1	颌下腺包膜还算完整,距边缘<1mm	1	1	只看冰冻号	1	2cm		1	无	0	0		无	0	0	无	未报		无			2018-10-24
RR张伟0		745989		3	S	3		20	80		3	100	53	976220	张伟	1	2	头颈外科1	“右腮腺癌术后” （1）（右腮腺面神经复发肿物） 纤维及横纹肌组织内见腺样囊性癌浸润，可见神经侵犯。 （冰1）（右颌下结节）（参见745895） 纤维组织中见腺样囊性癌浸润。 （冰2）（右下颌后缘软组织切缘）（参见745899）纤维组织，未见癌。	2017-10-09	2017-10-13 08:16:00	（1）灰黄不整形组织一块，大小4×2×2cm，局部可见缝线，缝线处为一条索状组织，长0.5cm，直径0.2cm。其余组织切面灰白质硬，大部分被肿物占据。	右腮腺，有颌下腺	1	腮腺	1	1	延伸至烧灼缘	1	2					1	不确定		2		无	0	0	无	未报		无		2017-3MRI复发，术中见右腮腺区、右颌下均见肿瘤	2017-10-18
P		755024		2	GC	5	60	40			1	100	52	1433280	范启桃	2	2	头颈外科1	（冰1）（右颌下清扫） 涎腺上皮来源恶性肿瘤，形态符合腺样囊性癌。肿瘤大小2.2×2×1.8cm，侵及涎腺组织、周围纤维脂肪组织及横纹肌组织，可见神经侵犯，未见明确脉管瘤栓。 淋巴结未见转移癌（0/6）。	2017-11-13	2017-11-17 08:20:00	（冰1）灰红组织总大小4.5×3×2cm。已被临床剖开，剖面见一肿物，大小2.2×2×1.8cm，灰白实性质硬界不清，似累及周围涎腺组织，涎腺组织大小3×2×1.5cm。另于周围脂肪组织中找见结节数枚，直径0.4-1.0cm。取部分该肿物冰冻。	右颌下	1	颌下腺	3	1	病变较局限，延伸烧灼缘	1	1		1	1.2		1	无		0		无	0	0	无	未报		无		术后放疗	2019-07-02
Re-0		761375		2	GCSB	5	20	30	30	20	3	100	38	1439129	闫红丽	2	1	头颈外科2	“左腮腺肿物外院术后” （冰1）（左腮腺浅叶及肿物）（参见761375） 腮腺腺样囊性癌，主要呈筛状型，部分为实性型。肿瘤侵犯周围脂肪及横纹肌组织，可见神经侵犯，未见明确脉管瘤栓。 （1）（左腮腺深叶） 腮腺组织，未见癌。 淋巴结未见转移癌（0/13） （2）（左颈2区淋巴结清扫） 0/9 （3）（左颈3区淋巴结清扫） 0/4 pTNM分期：pT3N0“左腮腺肿物外院术后” （冰1）（左腮腺浅叶及肿物） 腮腺腺样囊性癌，主要呈筛状型，部分为实性型。肿瘤侵犯周围脂肪及横纹肌组织，可见神经侵犯，未见明确脉管瘤栓。（左侧腮腺）： 腺样囊性癌，筛状型。（穿刺-右上颌窦肿物） X014410 有涎腺上皮来源的肿瘤细胞，考虑为腺样囊性癌。18-03557（左侧腮腺）： 腺样囊性癌，筛状型。	2017-12-06	2017-12-13 07:43:00	（1）灰黄组织一块，大小3.5×3.5×0.5cm，局灶质韧，未见明确肿物。（2）结节数枚，直径0.3-0.7cm。（3）结节数枚，直径0.3-0.7cm。	左腮腺	1	腮腺	1	2	6cm扩切，延伸烧缘	1	2					1	无		0		无	0	0	无	未报		无		2007年耳后肿物外院切除未送，2013年起自觉复发	2018-05-11
P		765133		5	G	1	90			10	2	100	57	1435197	齐万欣	1	2	头颈外科1	（3）（气管肿物） 气管腺样囊性癌，肿瘤最大径2.5cm，侵达气管外膜，粘连但未累及甲状腺组织。可见侵犯神经，未见明确脉管瘤栓。（4）（气管前壁）及（5）（气管前壁2）可见腺样囊性癌浸润。（6）（气管下壁）、（冰3）（上切缘）（参见765070）、（冰6）（前切缘2）（参见765088）、（冰7）（后切缘2）（参见765089）、（冰8）（下切缘2）（参见765090）及气管环周切缘未见癌。 （冰2）（前切缘）（参见765069） 气管壁内见癌组织浸润，形态符合腺样囊性癌，石蜡切片中癌消失。 （冰4）（下切缘）（参见765071） 气管壁外膜中见腺样囊性癌浸润。 （冰5）（后切缘）（参见765072） 气管壁内小灶异型腺体，不除外癌的可能，石蜡切片中消失。 （1）（甲状腺左叶）、（2）（喉前组织）、（冰1）（甲状腺右叶肿物）（参见765064） 结节性甲状腺肿。 甲状腺左叶旁淋巴结未见转…	2017-12-20	2017-12-28 16:03:00	（1）甲状腺左叶，大小4×3×2.5cm，被膜光滑，切面灰红，未见肿物。（2）甲状腺一块，大小2×0.8×0.4cm。（3）气管壁一段，长3.7cm，宽1.5-2.5cm，粘膜表面粗糙，面积2×1.5cm，切面粗糙区可见一肿物，大小2.5×2×1cm，灰白质细界不清，累及气管壁全层。（4）气管一段，大小4.5×0.5×0.5cm。（5）气管一段，大小3.5×0.5×0.5cm。（6）气管一段，大小2.5×0.5×0.5cm。	气管	1	气管	6	1	R1	1	1		1	2.5cm		1	无		0		无	0	0	无	未报	胃癌T2N0	无	EBER(-)。	2017-11-21先行远端胃癌术，气管癌术后放疗，胃癌未行化疗	2020-01-07
Re	切	766750		1	S	3	10	20	50	20	3	100	39	1215966	肖瑞萍	2	1	头颈外科1	X015395（穿刺-超声引导-左腮腺术区结节） 有腺样囊性癌细胞。“左侧腮腺腺样囊性癌术后” （1）（左腮腺肿物）、（3）（咬肌表面肿物）、（冰1）（左腮腺瘢痕组织）（参见766652）、（冰2）（左腮腺肿物）（参见766653）、 腮腺腺样囊性癌，累及腮腺外纤维、脂肪组织。可见侵犯小神经。 （2）（左腮腺深叶组织） 萎缩的涎腺组织，未见肿瘤。 （冰3）（面神经表面肿物）（参见766663） 少许纤维组织中可见腺样囊性癌浸润，包绕但未见侵犯神经。 腮腺淋巴结未见转移癌（0/2）。 rpTNM分期：rpT3N0（请结合临床）	2017-12-27	2018-01-02 18:57:00	（1）灰褐不整形组织数块，大小3×3×2cm，局灶切面灰白质韧，大小1.5×1.5×1.2cm，界不清。（2）纤维脂肪组织，总大小2×2×0.5cm。（3）不整形组织一块，大小2.5×2×1cm，切面灰白质韧。	左腮腺	1	腮腺	1	1	复发灶手术，面神经受累，没扫颈清，延伸烧缘	1	2					1	不确定	x	2		无	0	0	无	未报		无		2014-12外院左腮腺ADCC术后，	2019-05-17
P		774095		10	GCSB	5	10	30	30	30	3	100	51	1449622	王心奎	1	1	头颈外科2	（1）（右鼻侧壁）、（2）（部分硬腭）、（3）（鼻中隔） 被覆鳞状上皮及假复层纤毛柱状上皮的粘膜组织内均可见腺样囊性癌浸润，并累及骨、横纹肌组织，可见侵犯神经。T18-0263（鼻咽部） 腺样囊性癌。	2018-01-24	2018-01-31 11:41:00	（1）灰白粘膜组织及灰白破碎组织，总大小5×4×1.5cm，粘膜表面尚光滑，未见明确肿物。（2）不整形灰白组织一块，大小4×2.5×1.2cm，粘膜表面见一灰白粗糙区，面积1.3×0.6cm，距侧切缘最近0.8cm，周围粘膜组织灰白僵硬。（3）软骨样组织，大小5×2.5×1cm，表面被覆粘膜组织，局灶见一灰褐粗糙区，范围2.5×1.5×0.8cm。	右鼻腔，硬腭	1	鼻腔鼻窦颅底	4	1	侵犯骨质和硬腭，R1	1	1					1	不确定		2		无	0	0	无	未报		无		术后放疗	2018-06-04
P0		775047		2	S	3	10		90		3	100	54	1451119	高祥生	1	2	头颈外科1	（冰3）（左口底肿物）（参见775047） 涎腺源性肿瘤，符合腺样囊性癌。肿瘤最大径2.5cm，侵犯横纹肌、神经束及小涎腺，伴坏死及囊性变。免疫组化：Calponin(2+)，P63(2+)，CD10(-)，CK7(3+)，CK18(1+)，S-100(-)，CK5/6(3+)。 特殊染色：AB/PAS(+/-)。 （冰7）（舌腹切缘）、（冰8）（右侧口底切缘）、（冰9）（牙龈后切缘）、（冰10）（下切缘2）（参见775077-775079、775090） 上述送检组织均未见癌。 （冰4）（牙龈切缘）（参见775048）、（冰5）（下切缘）（参见775049） 粘膜组织内见癌浸润。 （冰6）（牙龈切缘2）（参见775076） 粘膜下见挤压的核深染异型细胞团浸润，考虑为癌。 （4）（部分下颌骨） 少许骨组织，未见肿瘤累及。 淋巴结转移性癌（1/18），累及淋巴结被膜外纤维脂肪及神经组织： …	2018-01-29	2018-02-05 10:17:00	（1）结节样物数枚，直径0.3-0.5cm。（2）结节样物数枚，直径0.3-0.8cm。（3）结节样物数枚，直径0.3-0.4cm。（4）破碎骨组织一堆，总大小3×3×0.5cm，取光。	左口底，	1	舌下腺	2	1	有R1,LNM	1	1	只看冰冻号				1	不确定		1		无	0	0	无	未报		有	Calponin(2+)，P63(2+)，CD10(-)，CK7(3+)，CK18(1+)，S-100(-)，CK5/6(3+)。 特殊染色：AB/PAS(+/-)。		2018-03-19
Re		782143		12	S	3	20		80		3	100	48	1459520	徐洪波	1	1	神外组1	（1）（左侧颅眶沟通肿瘤） 腺样囊性癌，累及周围纤维组织、横纹肌、骨组织及神经。	2018-03-05	2018-03-08 19:32:00	（1）破碎灰黄红褐色肿瘤组织一堆，总大小8×8×3cm，其中部分可辨认为骨组织，肿物切面灰白粗颗粒状，部分区域似累及骨。	左侧颅眶沟通	1	泪腺/颅眶沟通	19	1	R2,放疗科认为R1	1	1					1	不确定		2		无	0	0	无	未报		无		2017-10-12外院手术R2	2018/5/11疼痛，预后差截瘫可能电话妻13997111836和13909785176
P		783854		5	GS原20-10-20-50	5	30	20	30	20	3	100	44	1459904	王永苏	1	1	胸外科3	（5）（左肺上叶） 左肺上叶腺样囊性癌，可见神经侵犯，未见明确脉管瘤栓。肿瘤最大径4.2cm，主要位于叶段支气管，侵犯局灶肺组织及（7）（左肺上叶袖切的支气管壁组织），未累及脏层胸膜。（冰2）（下切缘）（参见783801）可见癌组织浸润，（冰1）（左肺上叶支气管切缘）（参见783755）、（冰3）（上切缘）（参见783802）、（冰4）（下切缘2）（参见783820）均未见癌。周围肺组织呈慢性炎，局灶伴支气管上皮化生。 淋巴结未见转移癌（0/24） 肺外淋巴结 0/3 肺内淋巴结 0/2 （1）（11区淋巴结） 0/7 （2）（4L区淋巴结） 0/4 （3）（左主支气管旁淋巴结）0/1 （4）（下肺韧带旁淋巴结） 0/3 （6）（7区淋巴结） 0/4 pTNM：pT2bN0 782181	2018-03-12	2018-03-20 09:54:00	（1）炭黑结节数枚，直径0.6-1.5cm。（2）炭黑结节数枚，直径0.8-1.2cm。（3）炭黑结节1枚，直径0.8cm。（4）炭黑结节数枚，直径0.5-0.8cm。（5）肺叶组织大小17×11×4cm，脏层胸膜表面光滑，沿支气管剖开肺，距支气管断端0.5cm处见一肿物，大小4.2×3×2.5cm，肿物切面灰白质硬界欠清，累及叶段支气管，未累及脏层胸膜，多切面切开周围肺，周围肺灰红质软。肺内外找到炭黑结节数枚，直径0.5-1.5cm。（6）炭黑结节数枚，直径0.8-1.5cm。（7）支气管壁组织，总大小1.5×1×1cm。主支气管长0.6cm，直径1.2cm，	支气管	2	气管支气管	6	1	R0	0	1		1cm	4.2cm		1	无		0		无	0	0	无	未报		无		建议术后放疗？	2019-10-15
P		784392		3	B原0-20-10-70	4	10	20	0	70	2	100	21	1461634	王泽尧	1	1	头颈外科1	（冰1）（左颌下腺及肿物） 涎腺上皮来源的肿瘤，间质明显粘液变性，局部细胞丰富，结合冰余组织切片，肿瘤主要呈条索及腺样结构，少量筛状，并显示小灶神经侵犯，符合腺样囊性癌；肿瘤最大径2.5cm，界限清楚，局灶凸向涎腺组织内生长。周围涎腺未见明显异常。 免疫组化结果显示：Ki-67(活跃区40%+)，Calponin、P63(肌上皮+)，S-100(肿瘤细胞和神经3+)，CK19(3+)，CK5/6(3+，主要为肌上皮细胞)，Vimentin(3+)，CD34(-)。 pTNM分期：pT2（请结合临床） 注：本例经科内早读会诊，同意该诊断。	2018-03-14	2018-03-26 11:40:00	（冰1）灰红不整形组织一块，大小4×3.5×2cm，沿最大面剖开，剖面见一肿物，大小2.5×2×1.5cm，切面灰白灰黄实性质韧，界尚清，取部分肿物冰冻。周围腺体灰白质软。	左颌下腺	1	颌下腺	3	1	2.5cm，距边缘<1mm	1	1					1	不确定		2		无	0	0	无	未报		有	Ki-67(活跃区40%+)，Calponin、P63(肌上皮+)，S-100(肿瘤细胞和神经3+)，CK19(3+)，CK5/6(3+，主要为肌上皮细胞)，Vimentin(3+)，CD34(-)。	发现肿物8年，术后放疗49Gy，病理疑难早读，信任弱	2019/10/29无检查结果
P		785096		5	SC	5	20	40	40		3	100	39	1461248	郭建军	1	1	头颈外科2	（冰2）（右腮腺及肿物） 腮腺腺样囊性癌。肿瘤大小4.5×4.2×2cm，累及腮腺外纤维脂肪及横纹肌组织。可见多发神经侵犯。 腮腺旁另见淋巴结一枚，未见转移癌（0/1）。 （详见785147）X021104（穿刺-右腮腺肿物） 涎腺上皮来源的肿瘤细胞，首先考虑为腺样囊性癌。	2018-03-15	2018-03-21 10:19:00	（冰2）灰红组织，大小7×4×2.5cm，多切面切开，切面见一肿物，大小4.5×4.2×2cm，肿物切面灰白实性质硬界欠清，取部分肿物冰冻。其余组织灰黄分叶状。	右腮腺	1	腮腺	1	2	4cm，距边缘<1mm	1	1	只看冰冻号				1	不确定		0		无	0	0	无	未报		无		术后放疗	2020-01-08
P		787297		9	BC	5		50		50	2	100	26	1463224	张瑶瑶	2	1	胸外科4	（7）（右肺中下叶袖状切除标本） 右肺中间段支气管根部腺样囊性癌，累及右主支气管、中及下叶叶段支气管和右肺下叶肺实质，未累及脏层胸膜，侵及肺门大血管壁。肿瘤大小3.5×3.5×3cm，可见多灶神经侵犯，未见明确脉管瘤栓。（冰3）（上叶支气管切缘）（参见787256）及（冰4）（主气管切缘）（参见787257）均可见肿瘤累及。中叶及下叶周围肺组织未见明显异常。 （冰2）（叶间肿物）（参见787180） 形态符合腺样囊性癌。 （6）（上叶支气管旁肿物） 纤维组织内见单个异型腺体，并可见粘液，伴重度灼烧退变，形态不除外腺样囊性癌浸润；另见淋巴结一枚，未见转移癌。 淋巴结转移性癌（3/33） （冰1）（7区淋巴结） 0/3，淋巴结间纤维组织内可见腺样囊性癌浸润 （参见787161） （1）（7区淋巴结） 0/3，淋巴结周围脂肪组织内见腺样囊性癌浸润 （2）（上叶支气管旁淋巴结）0/6 （3）（1…	2018-03-23	2018-03-29 15:32:00	（1）结节两枚，直径0.5-1.5cm。（2）结节数枚，直径0.3-1cm。（3）结节一枚，直径0.3cm。（4）结节数枚，直径0.5-1cm。（5）结节数枚，直径0.5-1cm。（6）结节一枚，直径0.5cm。（7）中叶肺大小11×8×5cm，下叶肺9×7×7cm，叶间裂发育尚可，上叶支气管长0.5cm，主支气管长0.5cm，中间段支气管长1.5cm，距主支气管断端1cm，中间段支气管及下叶叶段支气管内见一肿物，大小3.5×3.5×3cm，肿物堵塞下叶支气管，累及部分中叶叶段支气管，并侵及中下叶肺实质，局灶紧邻下叶肺膜。多切面切开周围肺，周围肺灰红质软，中叶肺局灶肺膜下见一炭黑结节，直径0.5cm。	中间段支气管	2	气管支气管	6	1	有R1,LNM	1	1					1	无		1		无	0	0	无	未报		无		术后放疗	2020-01-08
[truncated: 15 more columns]

## Sheet: 剔除染色与分型不符的切片
	病理号（705213之后在麦迪库）	TYPE-IHC修正	TRK分组简
	498757	3	2
	500317	1	2
	503592	5	2
	504458	4	2
	516975	3	1
	518891	4	2
	524519	2	2
	525012	5	3
	526015	3	2
	526900	3	1
	531053	5	2
	533747	2	3
	534878	5	2
	535433	2	2
	536083	3	2
	539308	3	2
	542114	3	2
	543148	5	2
	547096	1	2
	548003	1	2
	551287	1	2
	553547	1	3
	557517	1	2
	558332	3	2
	558393	2	2
	561587	5	2
	564137	5	2
	564808	3	2
	565078	1	1
	565397	1	2
	572619	2	2
	575225	5	2
	576315	2	2
	579394	5	3
	583707	1	2
	588154	5	2
	594300	5	3
	594530	5	2
	599800	3	2
	600838	1	2
	602858	1	3
	604277	2	3
	605149	3	2
	605476	1	2
	609615	3	1
	610392	2	2
	611712	3	2
	618539	3	2
	627768	1	2
	629464	1	2
	631111	3	2
	635698	2	2
	637111	3	2
	640698	4	1
	644772	5	3
	656430	3	2
	660956	3	2
	662822	5	2
	664823	2	2
	670684	5	2
	675818	5	2
	681042	2	2
	681169	5	2
	683580	2	2
	684583	5	1
	686090	5	2
	694556	3	2
	699978	5	3
	700733	3	1
	706368	5	2
	711604	3	2
	711803	2	3
	714087	1	2
	716648	2	3
	716763	5	2
	723871	3	2
	724756	2	3
	725547	5	2
	725998	5	2
	729568	2	3
	731979	5	2
	734215	3	1
	745989	3	3
	754646	3	2
	755024	5	3
	761375	5	2
	765133	1	2
	772140	3	3
	774095	5	2
	775047	3	2
	782143	3	1
	783854	5	2
	784392	4	2
	785096	5	2
	787297	5	3
	789704	2	3

## Sheet: 2010-2018primaryACCHN
ID	tubular%	cribriform%	Solid%	sclerosis%	grade	grade-HGT	age	sex	age group	date of surgery	site	margin status	max size(cm)	T stage	stage group	PNI	N stage	PORT dose and subsequent treatment	date of progression	type of progression	date of death	last contact	PFS(mo)	progression	OS(mo)	death
503592	60	40			1	1	51	1	2	2014-05-16	tongue	0	1.5	3	3	1	x	no PORT	no progression	no	alive	2020-10-26	76.5	0	76.5	0
504458	10	10	10	70	2	2	58	2	2	2014-05-23	tongue	0	1.5	3	3	1	0	no PORT	2017-02-20	M-lung	alive	2020-10-26	33	1	77	0
516975	10		90		3	4	27	2	1	2014-08-13	lacrimal gland	1	3	4b	4b	1	x	tumor bed69.96gy/high risk area60.06gy	2015-02-26	M-parietal bone	2015-12-01	2020-10-26	6.5	1	16	1
518891	15	5		80	1	1	73	2	2	2014-08-25	floor of mouth	1	3.5	3	3	1	1	PORT dose not available	2020-02-01	M-liver	alive	2020-10-26	66	1	74	0
524519		80	20		2	2	49	1	1	2014-09-29	maxillary sinus	1	4	4a	4a	1	x	tumor bed69.96gy/high risk area60.06gy	no progression	no	alive	2015-02-13	4.5	0	4.5	0
543148	10	30	10	50	2	2	65	2	2	2015-01-26	nasal cavity	1	1.5	4b	4b	1	x	tumor bed66gy/high risk area60.06gy	no progression	no	alive	2017-01-06	23.5	0	23.5	0
548003	80	20			1	1	47	2	1	2015-03-02	trachea	1	5	4a	4a	1	x	no PORT	unknown since 2019-11-15		alive	2020-10-26	56.5	0	66.5	0
558332	10	30	40	20	3	3	51	2	2	2015-04-29	lips	1	2	2	2	1	x	no PORT	2018-03-27	R	alive	2019-11-13	35	1	54.5	0
564137		30	20	50	2	2	50	1	1	2015-05-29	parotid gland	1	3	3	3	1	0	tumor bed69.96gy/high risk area60.06gy/concurrent nimotuzumab, apatinib after metastasis	2016-01-01	M-lung	alive	2020-10-26	7.5	1	65	0
565078	100				1	1	56	2	2	2015-06-03	trachea	1	3	3	3	0	x	tumor bed66gy/high risk area60.06gy	no progression	no	alive	2017-06-08	24	0	24	0
575225	40	40	20		2	2	62	2	2	2015-07-23	floor of mouth	1	3	3	3	1	x	lost of follow-up	no progression	no		lost of follow-up
576315	30	50	5	15	2	2	45	1	1	2015-07-29	sublingual gland	1	2	3	3	1	0	tumor bed66gy/high risk area60.06gy	unknown since 2019/11/19		alive	2020-10-26	52	0	63	0
588154	15	15	70		3	4	54	2	2	2015-10-08	palate	1	4.5	4a	4a	1	x	lost of follow-up	no progression	no		lost of follow-up
594300	10	35	15	40	2	2	44	1	1	2015-11-09	trachea	1	3.5	4a	4a	1	x	no PORT, apatinib after metastasis	2018-11-08	M-lung	alive	2020-08-31	36	1	57.5	0
599800	5	30	55	10	3	4	53	2	2	2015-12-04	submandibular gland	1	4.5cm	3	4a	1	2b	PORT dose not available	no progression	no	alive	2020-10-26	58	0	58	0
604277	5	70	5	20	2	2	51	2	2	2015-12-28	submandibular gland	1	4.5	3	3	1	0	no PORT	no progression	no	alive	2020-10-26	57	0	57	0
627768	70	15	5	10	2	2	49	2	1	2016-04-27	larynx	1	2	4a	4a	1	0	PORT dose not available	no progression	no	alive	2020-10-26	54	0	54	0
635698	5	40	5	40	2	2	52	1	2	2016-06-02	nasal cavity	1	5	3	3	0	x	tumor bed69.96gy/high risk area60.06gy/low risk area50.96Gy	no progression	no	alive	2020-10-26	55.5	0	55.5	0
644772	10	45	10	35	2	2	35	1	1	2016-07-14	maxillary sinus	0	5	3	3	1	x	tumor bed69.96gy/high risk area60.06gy/low risk area50.96Gy	2020-01-01	M-lung	alive	2020-10-26	42	1	51	0
660956	10	15	65	10	3	3	53	2	2	2016-10-09	parotid gland	0	3	2	2	0	x	no PORT	no progression	no	alive	2020-10-26	48.5	0	48.5	0
662822	10	40	15	35	2	2	58	1	2	2016-10-17	trachea	1	2.7	3	3	1	x	tumor bed59.92Gy	no progression	no	alive	2020-09-08	48	0	48	0
686090	30	10	30	30	2	2	48	2	1	2017-01-22	nasopharynx	1	4	1	1	0	x	tumor bed69.96gy/high risk area60.06gy	no progression	no	alive	2017-10-21	9	0	9	0
694556	10	30	50	10	3	4	55	2	2	2017-03-09	maxillary sinus	0	4	2	2	1	x	tumor bed53gy/high risk area45.5gy	no progression	no	alive	2020-10-26	42	0	42	0
699978	10	40	10	40	2	2	50	2	1	2017-03-30	floor of mouth	1	6	3	3	1	0	no PORT	2018-07-01	R	alive	2020-09-09	16	1	42	0
714087	50	10	20	20	2	2	48	1	1	2017-05-26	palate	1	2.5	2	2	1	x	PORT dose not available	no progression	no	alive	2020-10-26	41	0	41	0
716763		50	50		3	4	58	1	2	2017-06-08	external auditory canal	1	4	4	4	1	x	no PORT	2018-12-01	R&m-lung	2018-12-01	2020-10-26	18	1	18	1
723871	10	10	70	10	3	3	64	2	2	2017-07-05	external auditory canal	1	1.5	2	2	1	x	no PORT	2019-07-18	M-lung	alive	2020-10-26	24.5	1	39	0
725998	20	30	30	20	2	2	39	1	1	2017-07-13	larynx	1	2.5	3	3	1	0	no PORT	unknown since 2019/7/3		alive	2020-10-26	24	0	36	0
731979	50	50			1	1	41	2	1	2017-08-09	submandibular gland	1	2	2	2	1	0	no PORT	no progression	no	alive	2020-10-26	38.5	0	38.5	0
755024	45	50	5		2	2	52	2	2	2017-11-13	submandibular gland	1	2.2	3	3	1	0	PORT dose not available	no progression	no	alive	2020-10-26	35.5	0	35.5	0
765133	80	15		5	1	1	57	1	2	2017-12-20	trachea	1	2.5	3	3	1	0	tumor bed66gy/high risk area60.06gy	no progression	no	alive	2020-06-23	30	0	30	0
774095	10	30	30	30	2	2	51	1	2	2018-01-24	nasal cavity	1	2.5	3	3	1		tumor bed69.96gy/high risk area60.06gy	no progression	no	alive	2018-06-04	4.5	0	4.5	0
775047	10		90		3	3	54	1	2	2018-01-29	floor of mouth	1	2.5	3	3	1	1	no PORT, chemotherapy after metastasis	2019-12-01	M-lung	alive	2020-10-26	22.5	1	33	0
784392	10	20	0	70	1	1	21	1	1	2018-03-14	submandibular gland	1	2.5	2	2	1		PORT dose not available	unknown since 2019-4-11		alive	2020-07-12	12	0	28	0
785096	20	40	40		3	3	39	1	1	2018-03-15	parotid gland	1	4.5	3	3	1	0	tumor bed69.96gy/high risk area60.06gy	2020-01-08	M-lung	alive	2020-09-15	22	1	31.5	0
376390	5	70	15	10	2	2	58	2	2	2010-08-11	root of tongue	1	6.1	3	4a	0	2b	no PORT	no progression	no	2011-12-01	2020-10-26	16	0	16	1
380895	20	10	60	10	3	3	43	1	1	2010-10-20	parotid gland	1	4	4a	4a	1	0	no PORT, surgery after recurrence	2012/4/24,2012-5	R,then m-lung	alive	2012-10-10	18	1	24	0
380989	45	35	20		2	2	64	2	2	2010-10-20	trachea	1	1	3	3	1		tumor bed70.29/high risk area61.71	unknown since 2011-3-1		2011-06-01	2020-10-26	4.5	0	8	1
383834	25	35	35	5	3	3	42	1	1	2010-11-26	maxillary sinus	1	3.5	4a	4a	1		tumor bed69.96gy/high risk area60.06gy	2013-01-24	M-lung	alive	2020-10-26	26	1	119	0
387615	3	2	90	5	3	4	48	2	1	2011-01-19	floor of mouth	1	4	3	4b	1	N3b	tumor bed63.9/high risk area54.6/low risk area 50.96	2011-08-01	M-lung	2012-12-01	2020-10-26	7	1	22	1
388202	10	60	10	20	2	2	42	1	1	2011-01-26	maxillary sinus	0	5	3	3	0		tumor bed69.96gy/high risk area60.06gy	no progression	no	alive	2019-05-28	100	0	100	0
388458	30	40	20	10	2	2	48	2	1	2011-02-10	root of tongue	1	5	3	3	1	0	no PORT	no progression	no	alive	2012-03-19	13.5	0	13.5	0
388968	40	40	10	10	2	2	47	2	1	2011-02-16	root of tongue	1	3	2	2	1	0	no PORT	no progression	no	alive	2012-03-21	13	0	13	0
399183	5	85	5	5	2	2	37	2	1	2011-06-22	floor of mouth	1	1.5	3	3	1	0	lost of follow-up	no progression	no		lost of follow-up
399434	30	70			1	1	63	2	2	2011-06-23	maxillary sinus	1	6	4a	4a	1	0	no PORT	2012-09-14	R	2016-04-01	2020-10-26	15	1	58	1
402188		30	30	40	2	2	72	1	2	2011-07-27	floor of mouth	1	1	2	2	0	0	no PORT	no progression	no	2017-12-01	2020-10-26	77	0	77	1
403999	10	80		10	2	2	56	1	2	2011-08-18	trachea	1	2	3	3	0		tumor bed69.96gy/high risk area60.06gy	no progression	no	alive	2020-09-24	109	0	109	0
404252	5	50	15	30	2	2	39	1	1	2011-08-22	nasal cavity	0	4	1	1	0		no PORT	no progression	no	alive	2017-04-13	68	0	68	0
409299	10	30	30	30	2	2	54	2	2	2011-10-28	nasal cavity	0	2	3	3	1	0	tumor bed73.59//high risk area60.06	no progression	no	alive	2020-09-20	107	0	107	0
416406	35	35	30		2	2	32	2	1	2012-02-02	lacrimal gland	1	2	4a	4a	1		no PORT, radiotherapy after recurrence	2016-10-01	R	alive	2020-10-26	56	1	105	0
424121	20	35	15	30	2	2	45	1	1	2012-04-26	nasal cavity	0	1.2	2	2	0		PGTV69.96/PTV1 60.06/PTV2 50.96, surgery for metastasis	2019-07-01	M-lung	alive	2020-10-26	86.5	1	102	0
424961	20	35	10	35	2	2	41	1	1	2012-05-04	palate	0	2	3	3	1	0	PORT dose not available	no progression	no	alive	2015-01-23	33	0	33	0
427250	5	10	75	10	3	4	44	1	1	2012-05-31	palate	1	3.9	4a	4a	1		no PORT, then received radiotherapy after surgery for recurrence	2012/9/11,2012-10-22	R,m-lung	2017-06-01	2020-10-26	3	1	61	1
427337	2	10	55	33	3	4	62	2	2	2012-06-01	parotid gland	1	5.5	3	3	1	0	no PORT	2012-12-08	R&LNM	2013-01-15	2020-10-26	6	1	7.5	1
427664	5	80	5	10	2	2	40	1	1	2012-06-06	submandibular gland	1	3.5	3	4a	1	2b	tumor bed69.96gy/high risk area60.06gy/low risk area50.96Gy	no progression	no	alive	2020-09-24	99.5	0	99.5	0
429727	10		90		3	4	56	1	2	2012-06-28	parotid gland	1	1	4a	4a	1	0	tumor bed69.96gy/high risk area60.06gy	no progression	no	alive	2020-09-26	99	0	99	0
431954		30	35	35	3	3	58	1	2	2012-07-23	sublingual gland	1	3.5	3	3	1	0	PORT dose not available	2015-03-19	M-chest wall	2020-07-01	2020-10-26	32	1	96	1
434226	5		90	5	3	4	58	2	2	2012-08-16	maxillary sinus	1	5	4b	4b	1		no PORT	2013-06-15	R	2013-06-15	2016-08-01	10	1	10	1
442676	5	30	55	10	3	3	45	1	1	2012-11-22	maxillary sinus	1	6	4a	4a	1		PORT dose not available	2018-07-15	M-lung	alive	2018-07-15	68	1	68	0
444077	10		90		3	4	41	2	1	2012-12-10	submandibular gland	1	1.5	3	3	1	2b	lost of follow-up	no progression	no		lost of follow-up
449294	60	20	20		2	2	54	2	2	2013-02-04	palate	1	2.5	2	2	1		tumor bed69.96gy/high risk area60.06gy	no progression	no	alive	2020-10-26	92.5	0	92.5	0
454115	5	5	90		3	4	66	2	2	2013-03-28	parotid gland	1	4	4a	4a	1	1	no PORT	2014-03-24	M-dura meter	alive	2014-04-17	12	1	12.5	0
459458		45	5	50	2	2	59	1	2	2013-05-15	tonsil	0	2.8	2	2	1	0	PORT dose not available, surgery for metastasis	2020-05-01	M-lung	alive	2020-10-26	84	1	89.5	0
463191	5	20	55	20	3	3	46	1	1	2013-06-19	trachea	1	2.8	4	4	1		tumor bed69.96gy/high risk area60.06gy/concurrent nimotuzumab	2014-06-01	M-lung	2020-02-14	2020-10-26	12	1	80	1
471418	10	40	10	40	2	2	50	2	1	2013-08-28	tonsil	1	4	2	2	0	0	tumor bed66gy/high risk area60.06gy	no progression	no	alive	2020-09-24	85	0	85	0
473877	20	60	10	10	2	2	54	2	2	2013-09-18	larynx	1	4	4	4	1		no PORT	2018-01-06	R	alive	2018-01-06	52	1	52	0
475841	10	20	40	30	3	3	70	2	2	2013-10-11	nasopharynx	1	2	1	1	0		PORT dose not available	no progression	no	alive	2020-09-26	83	0	83	0
490362	5	30	35	30	3	3	57	1	2	2014-02-12	trachea	1	2.5	3	3	1		no PORT	2020-05-20	M-cervical subcutaneous tissue	alive	2020-06-12	75.5	1	76.5	0
507798	40	40	10	10	2	2	50	2	1	2014-06-12	external auditory canal	1	2	1	1	1		no PORT	no progression	no	alive	2020-09-22	75	0	75	0
597726	5	5	90		3	4	29	1	1	2015-11-25	nasal cavity	1	3.5	3	3	1		tumor bed69.96gy/high risk area60.06gy	2019-03-09	M-lung	alive	2020-10-26	39.5	1	59	0
643626	5		95		3	4	50	2	1	2016-07-11	submandibular gland	1	1.7	1	3	1	1	no PORT, chemotherapy after metastasis	2017-02-01	R&m-lung	2020-09-01	2020-10-26	7	1	50	1
761440	70	30			1	1	47	2	1	2017-12-06	external auditory canal	1	1	1	1	1		lost of follow-up	no progression	no		lost of follow-up
770367	85	15			1	1	48	2	1	2018-01-10	external auditory canal	1	1	2	2	1	0	tumor bed63.9/high risk area54.6/low risk area 50.96	no progression	no	alive	2020-06-11	29	0	29	0
						3: conventional grade 3		1: male	1: <=50y			0: <1mm				0: negative								0: no		0: no
						4:HGT		2: female	2: >50y			1: >=1mm				1: positive								1: yes		1: yes
